# Supplementary material
Source: PubMed Central journal article supplement (PMC2917266)

**Enantioselective Synthesis of Allylboronates Bearing Tertiary or Quaternary  
B-Stereogenic Carbon by NHC-Cu-Catalyzed Substitution Reactions**

Aikomari Guzman-Martinez and Amir H. Hoveyda\*

*Department of Chemistry, Merkert Chemistry Center,  
Boston College, Chestnut Hill, Massachusetts 02467*

**SUPPORTING INFORMATION, PART II**

**NMR Spectra**

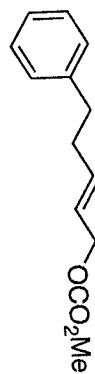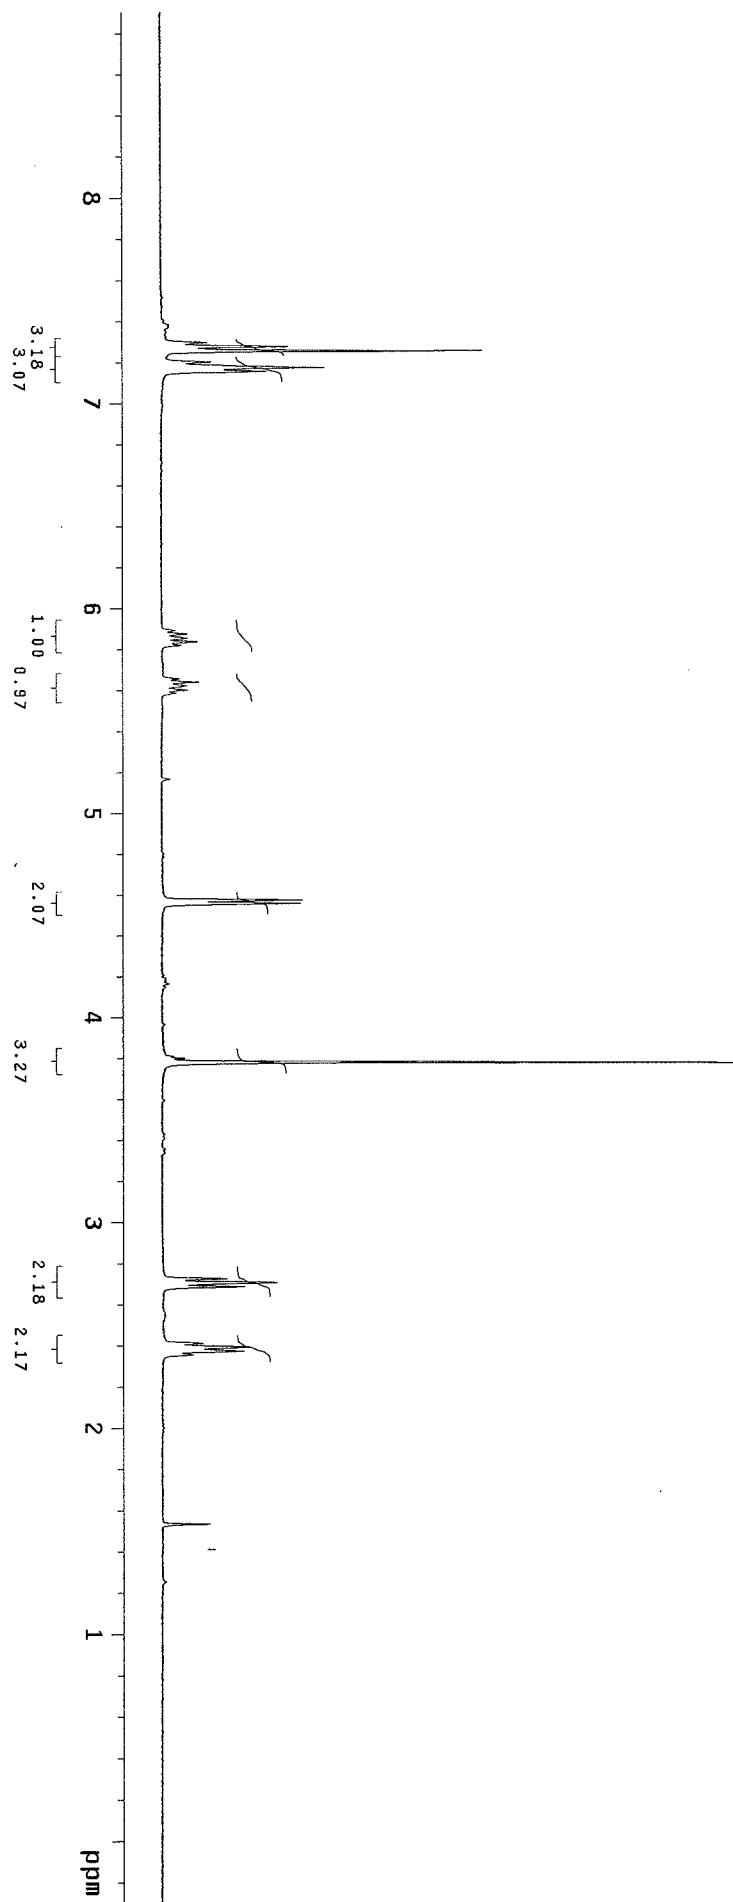

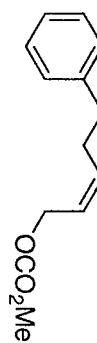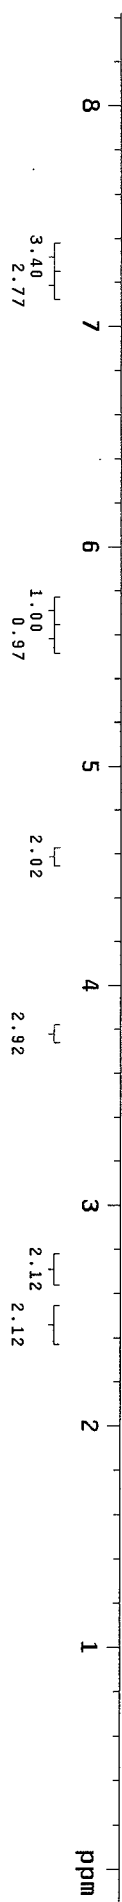

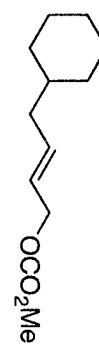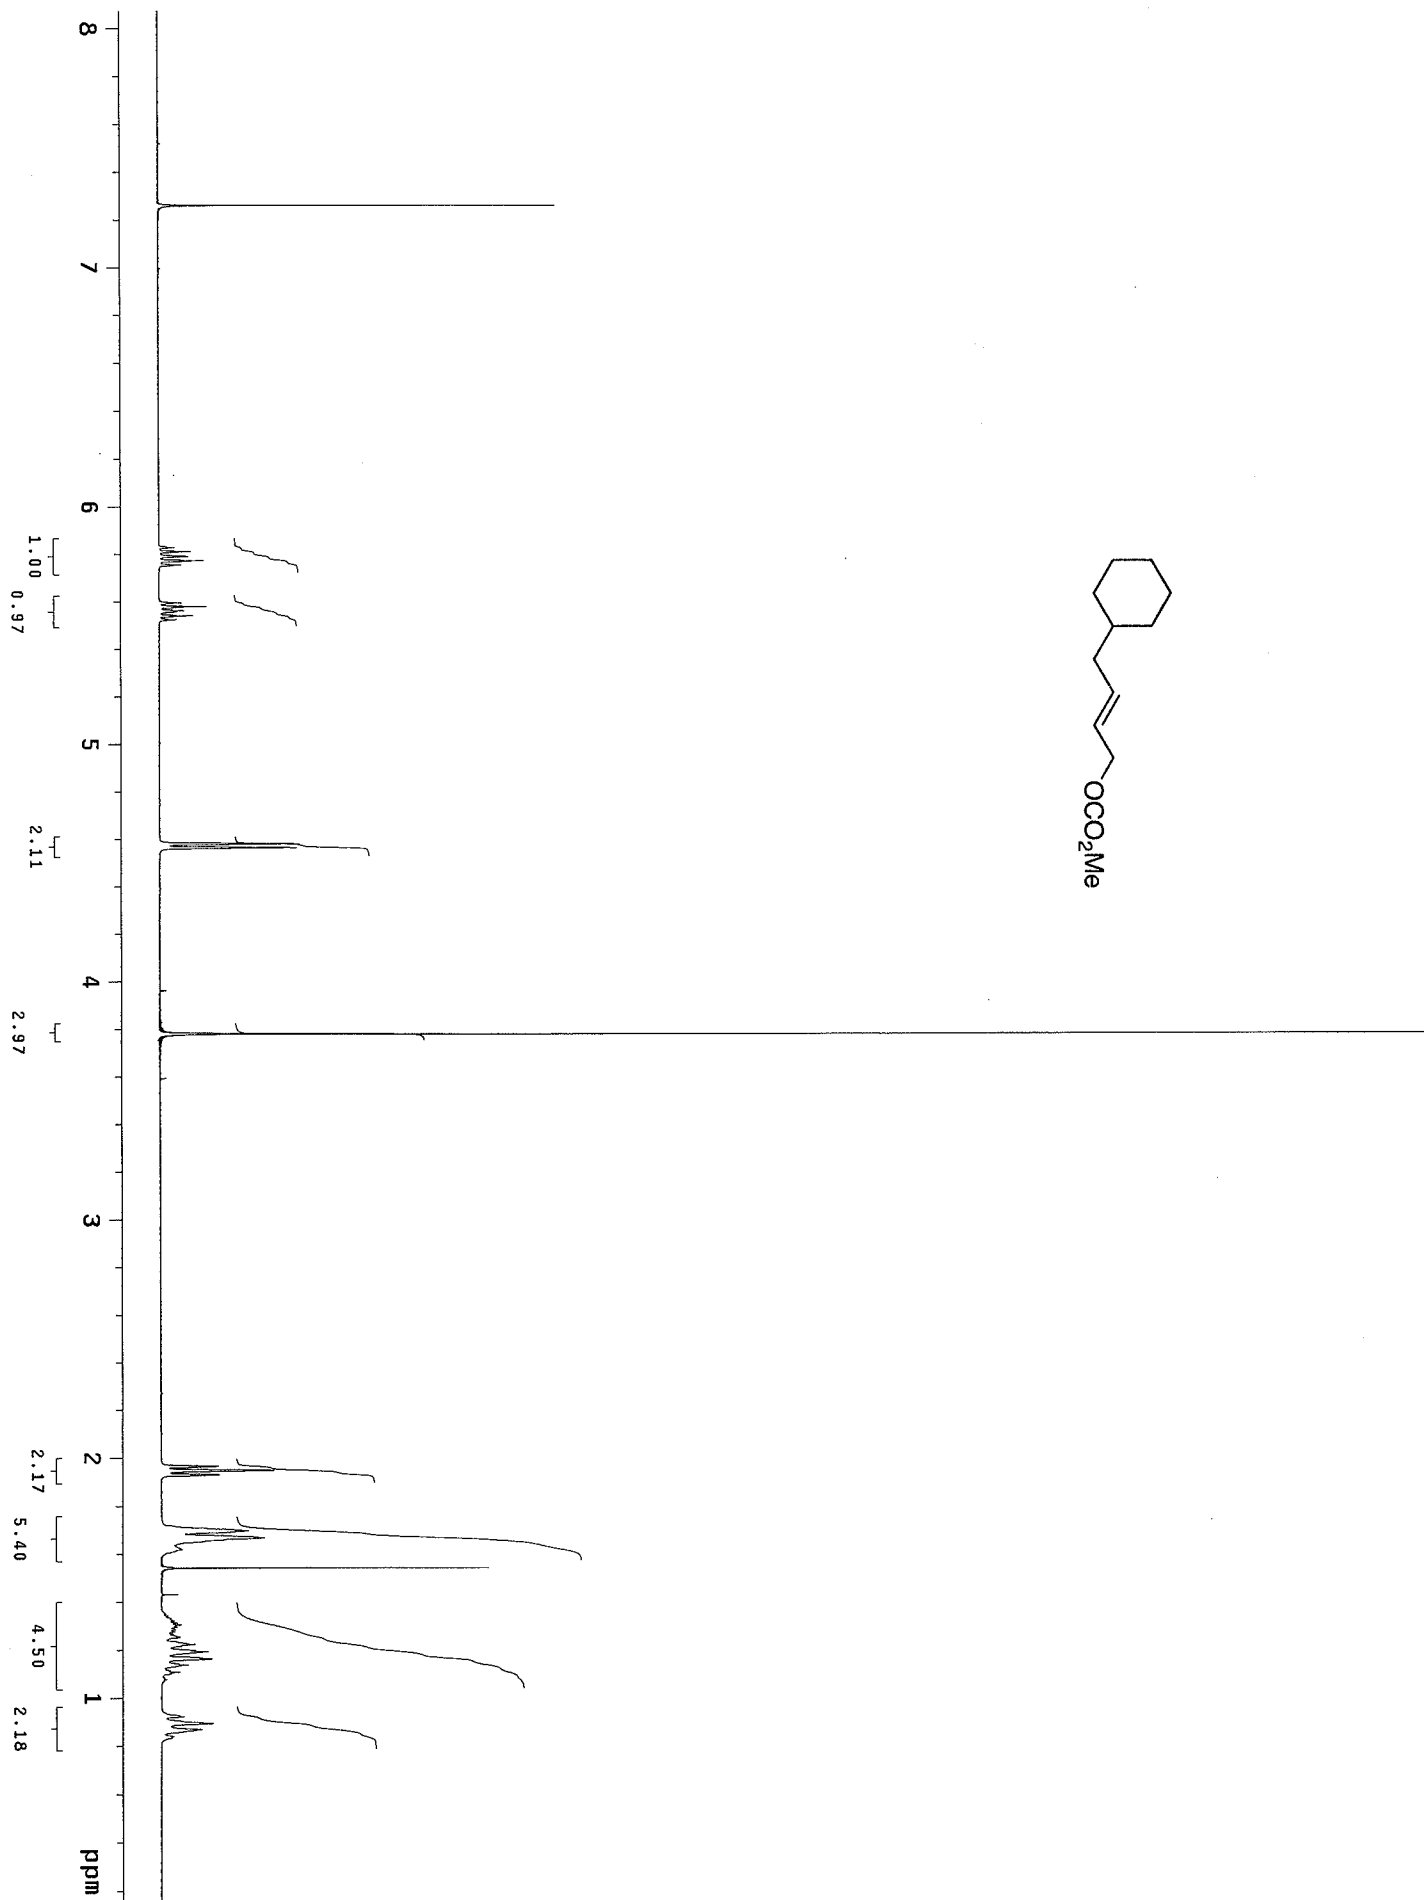

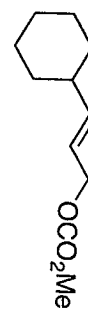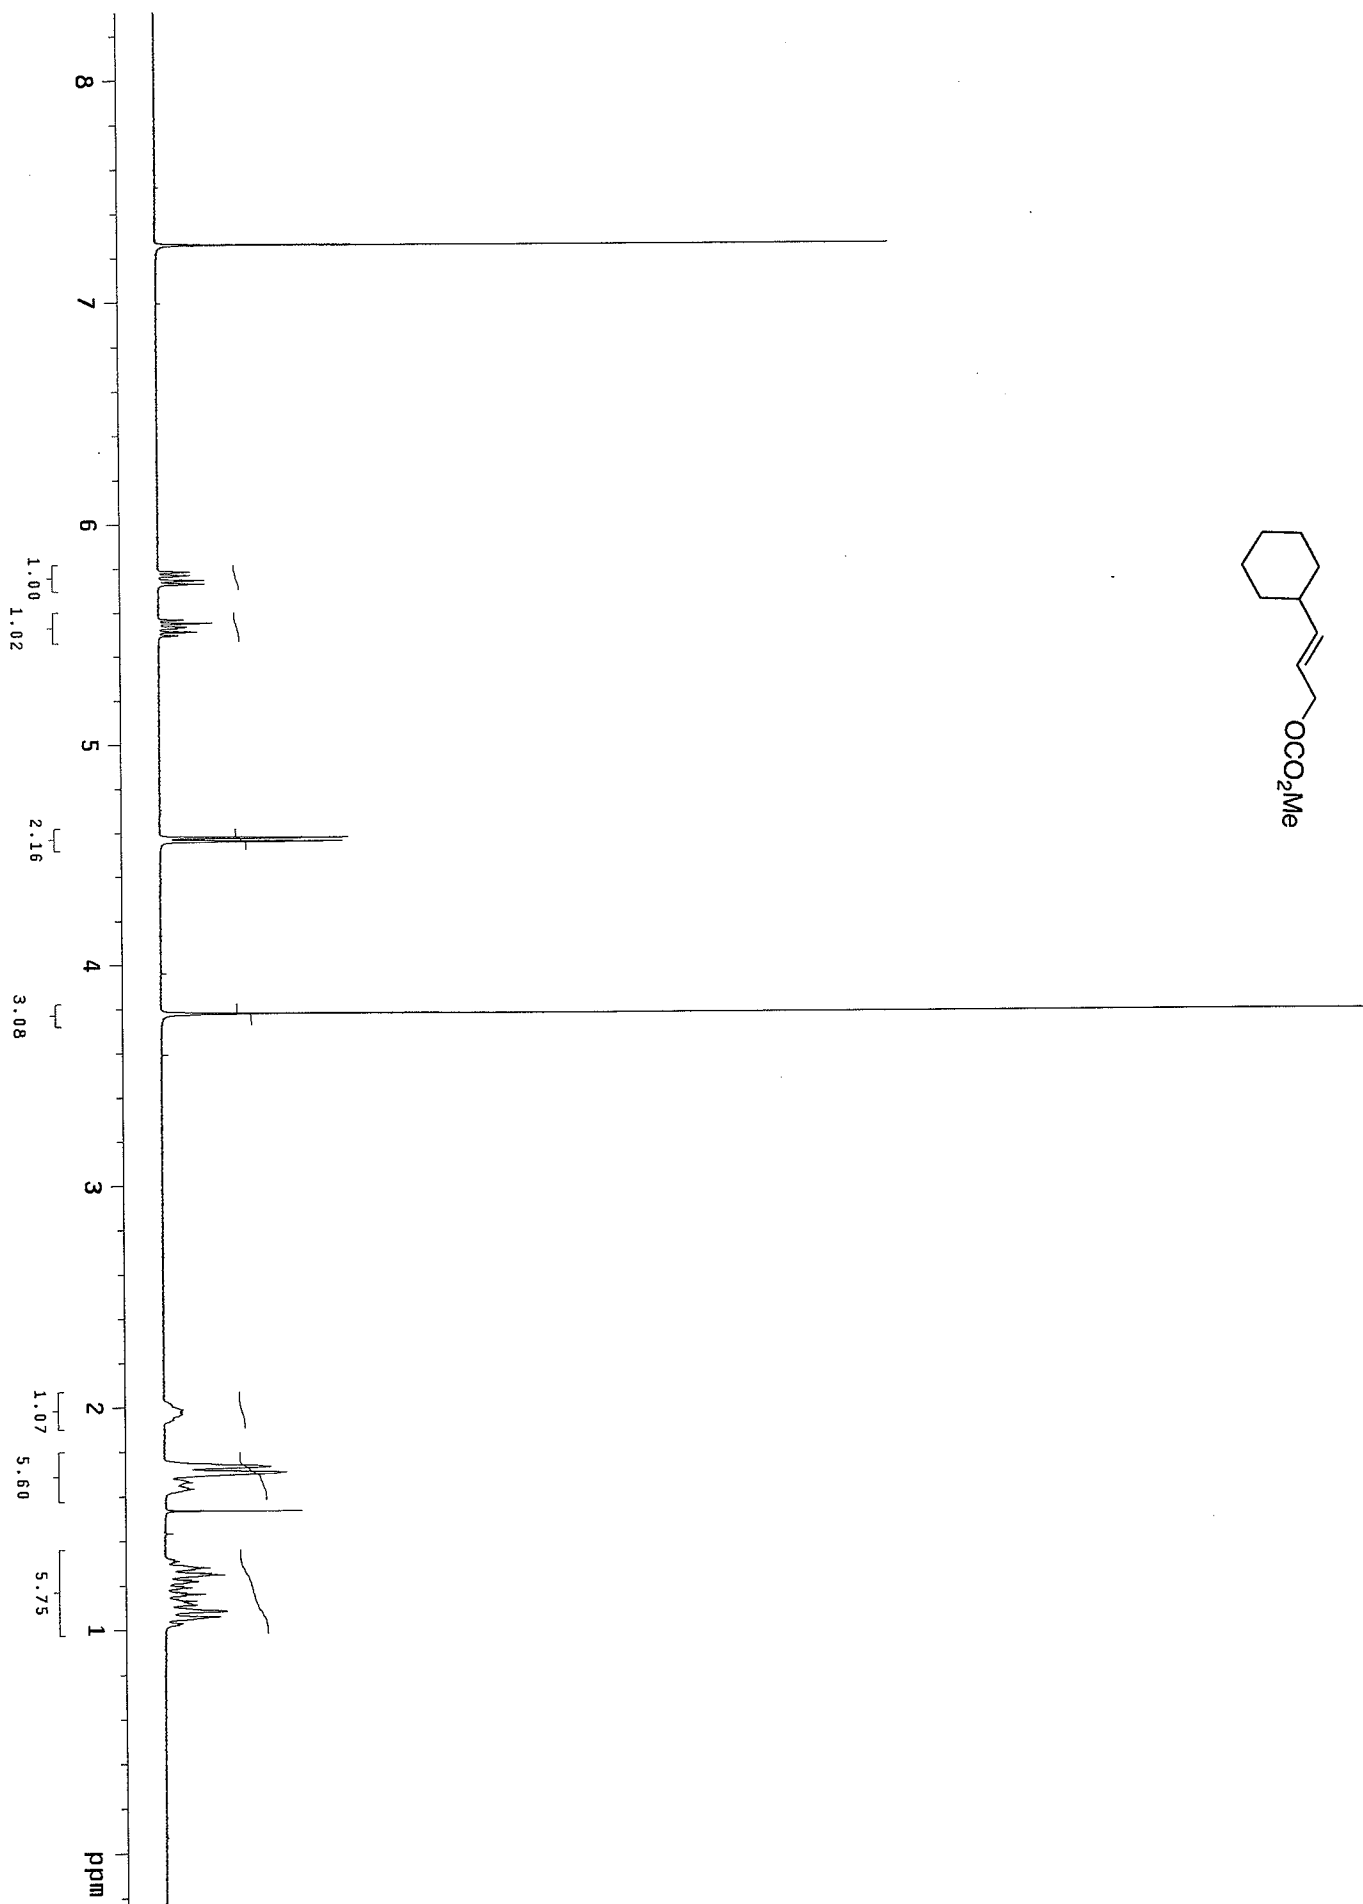

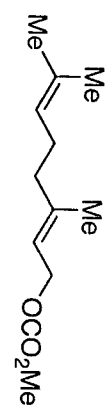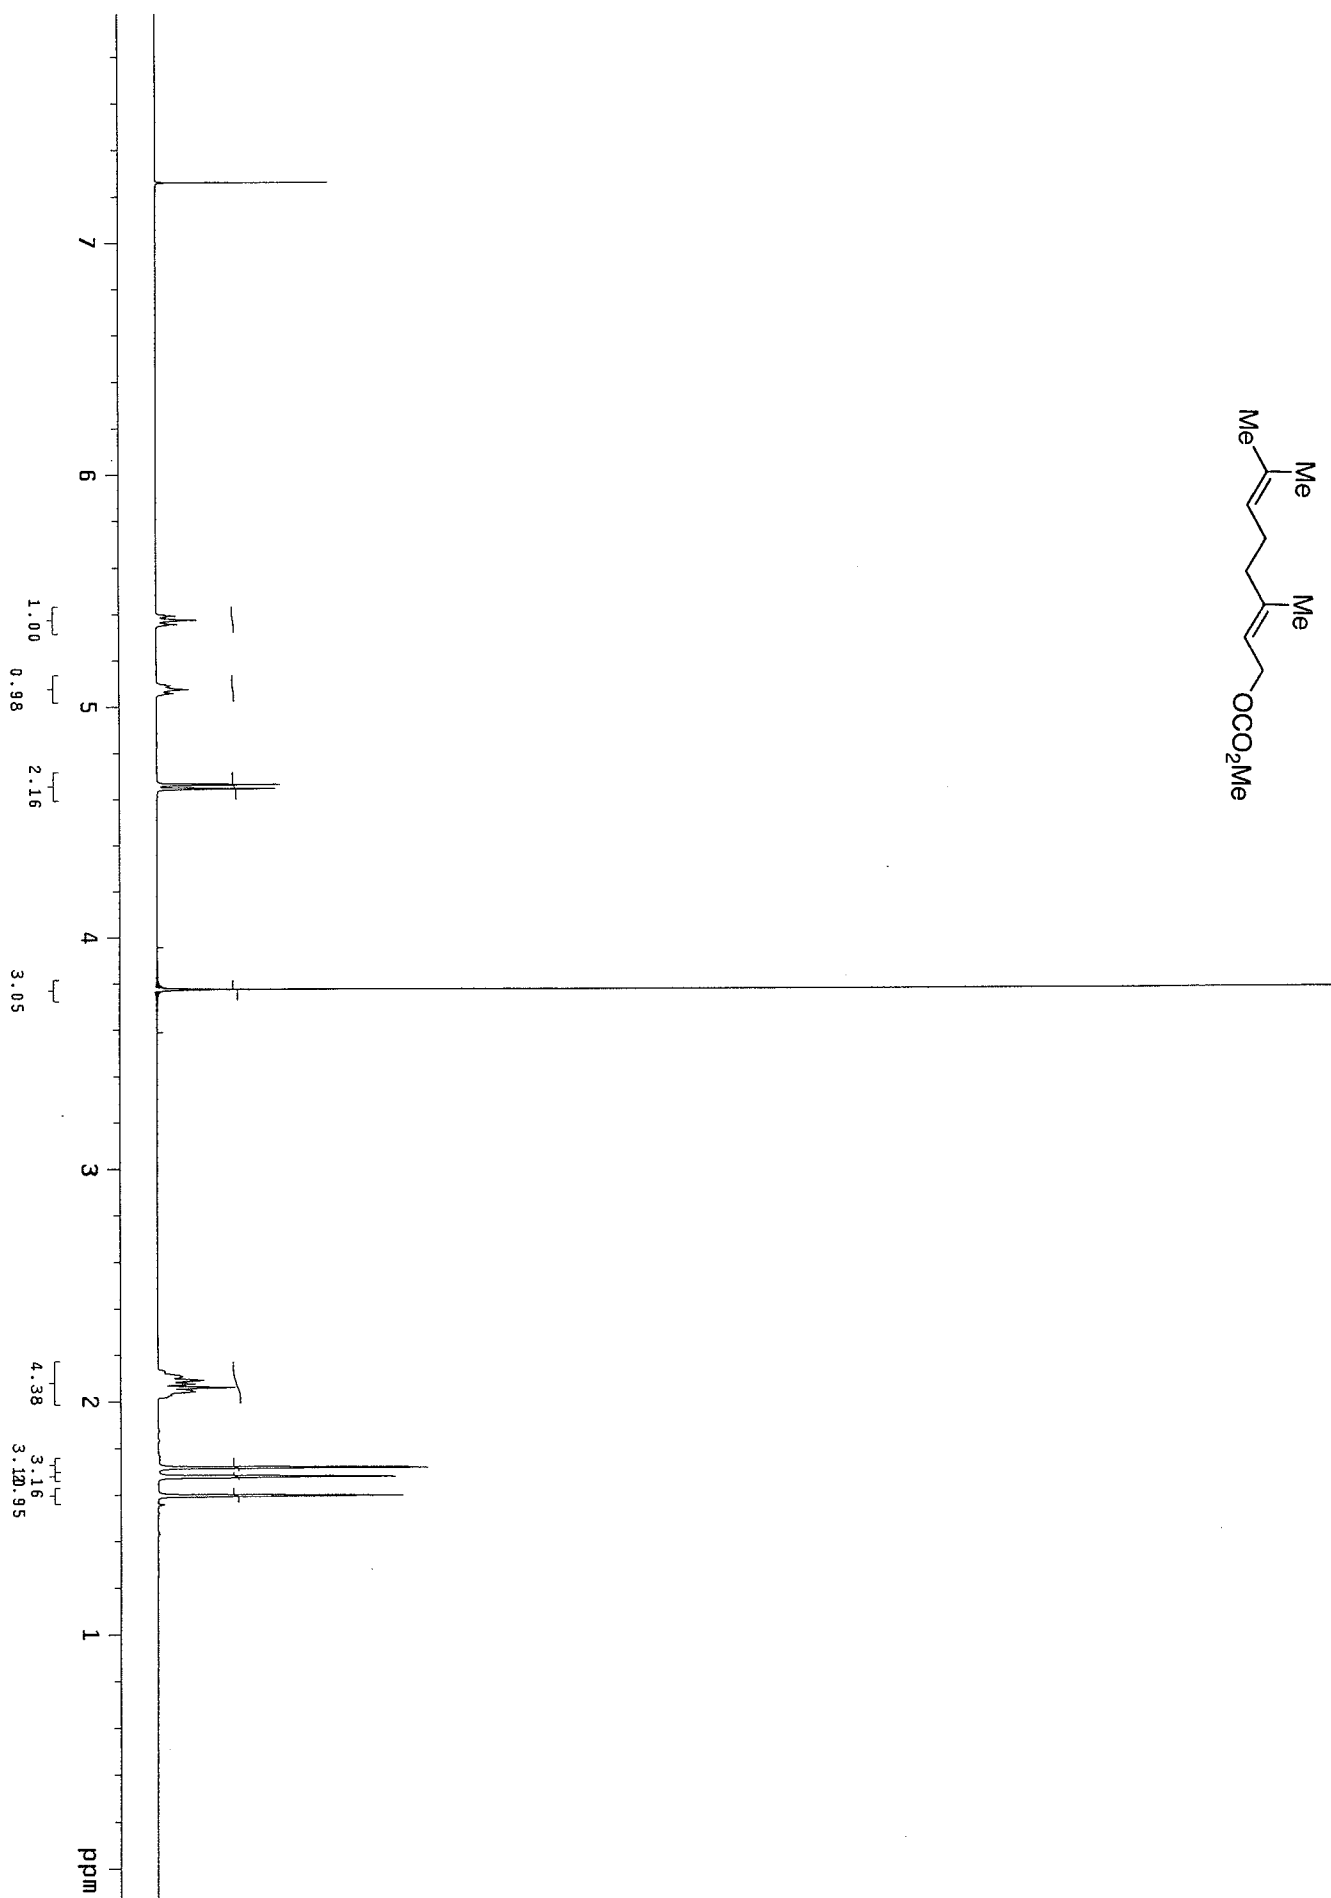

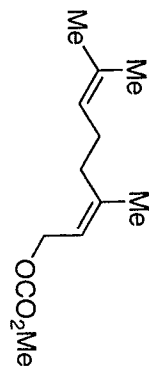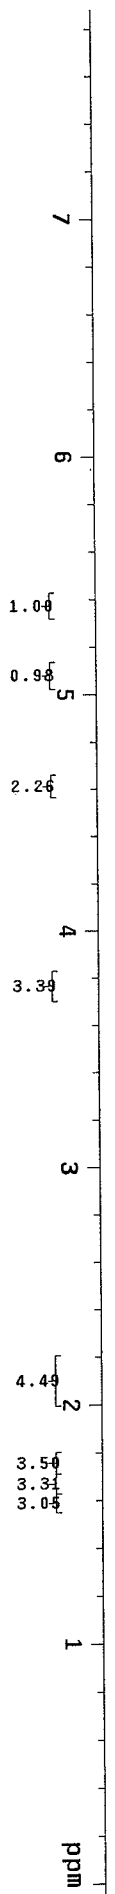

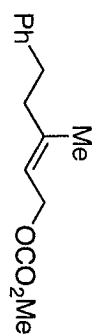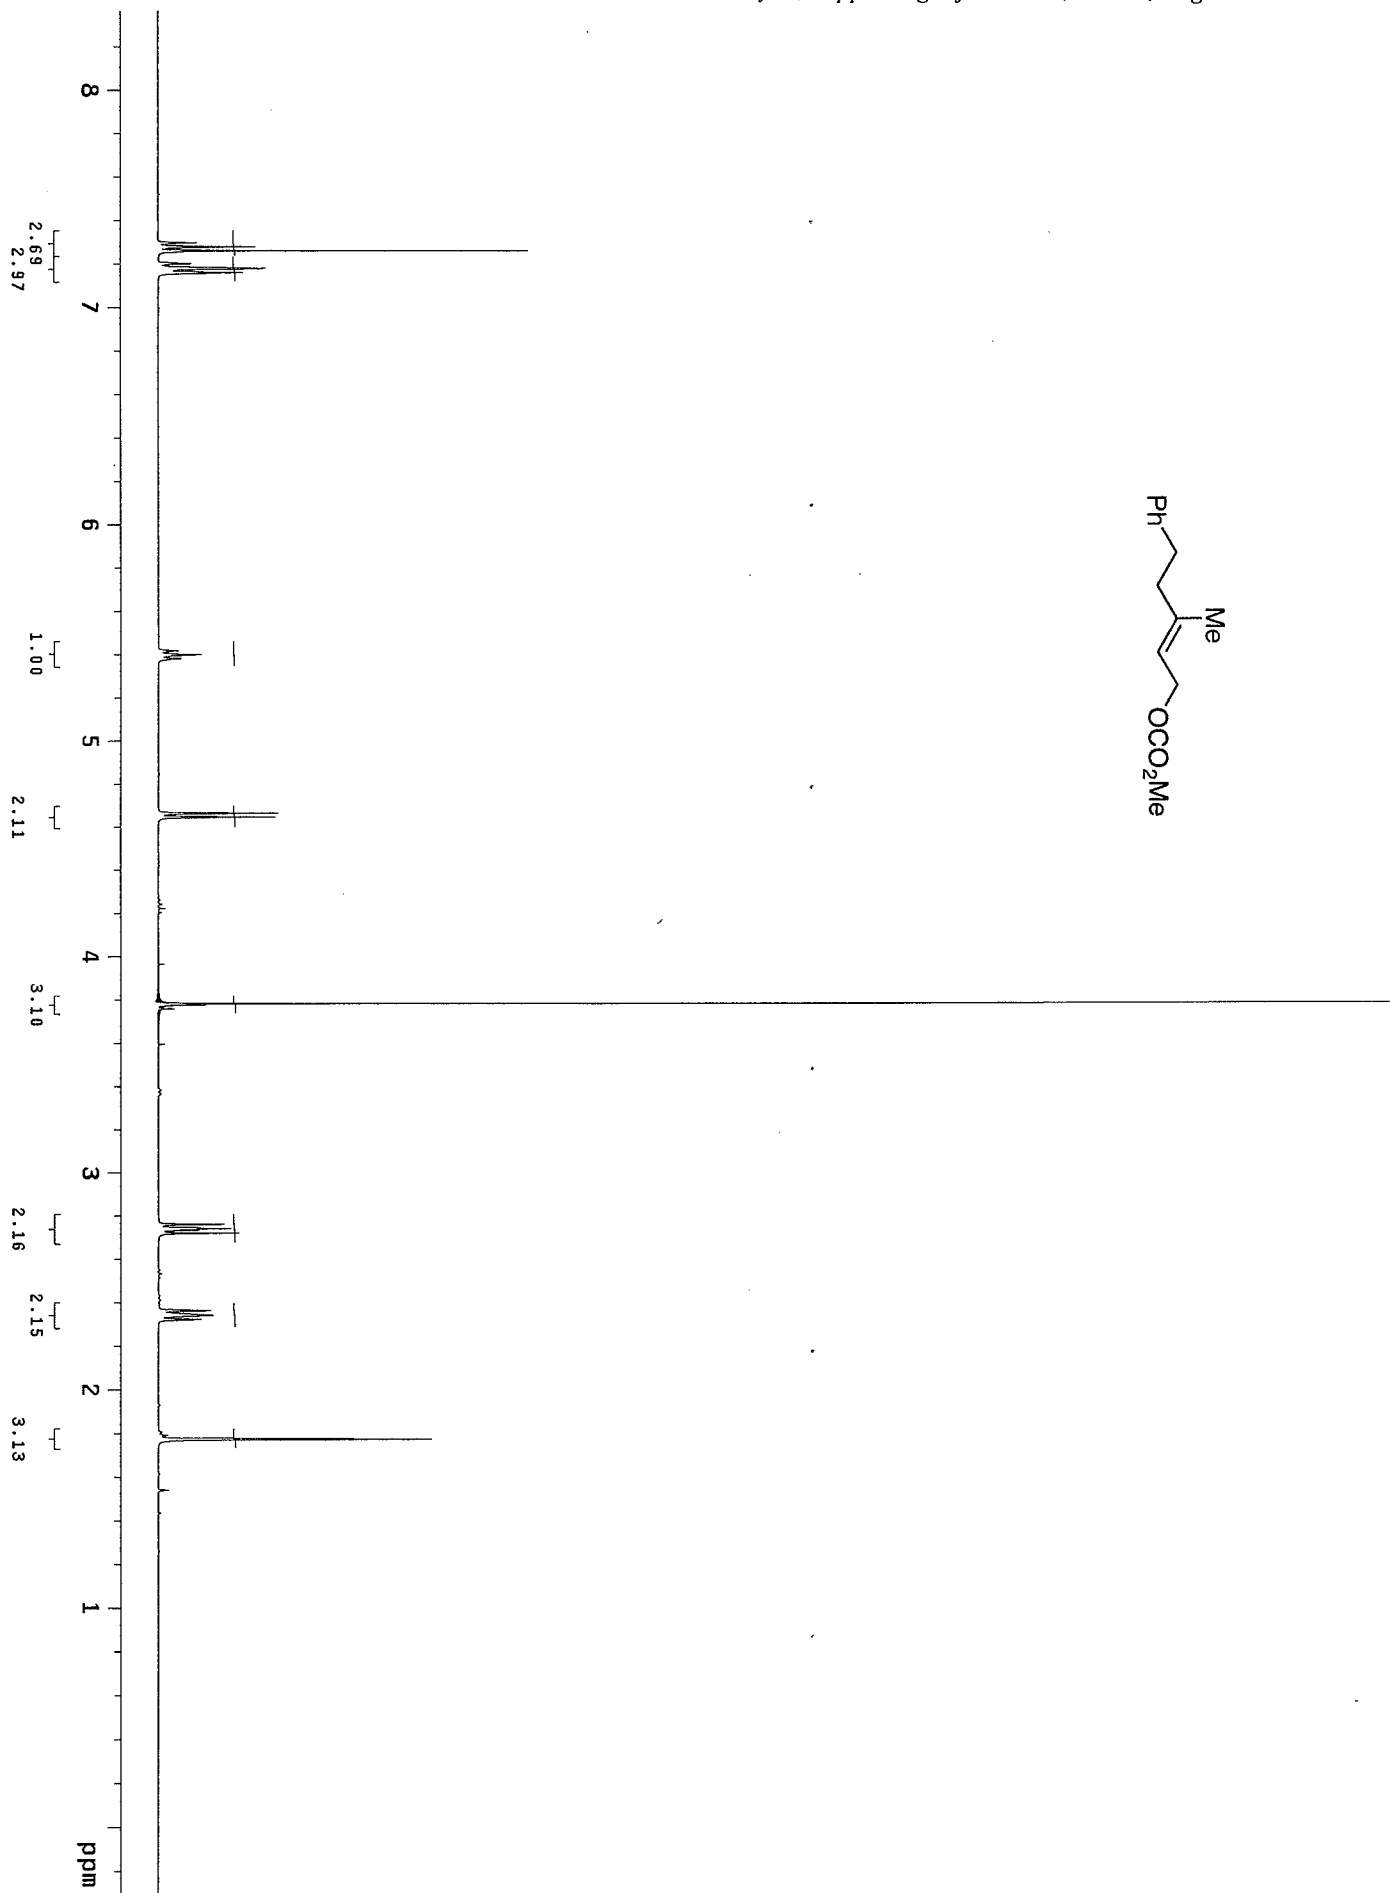



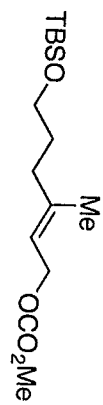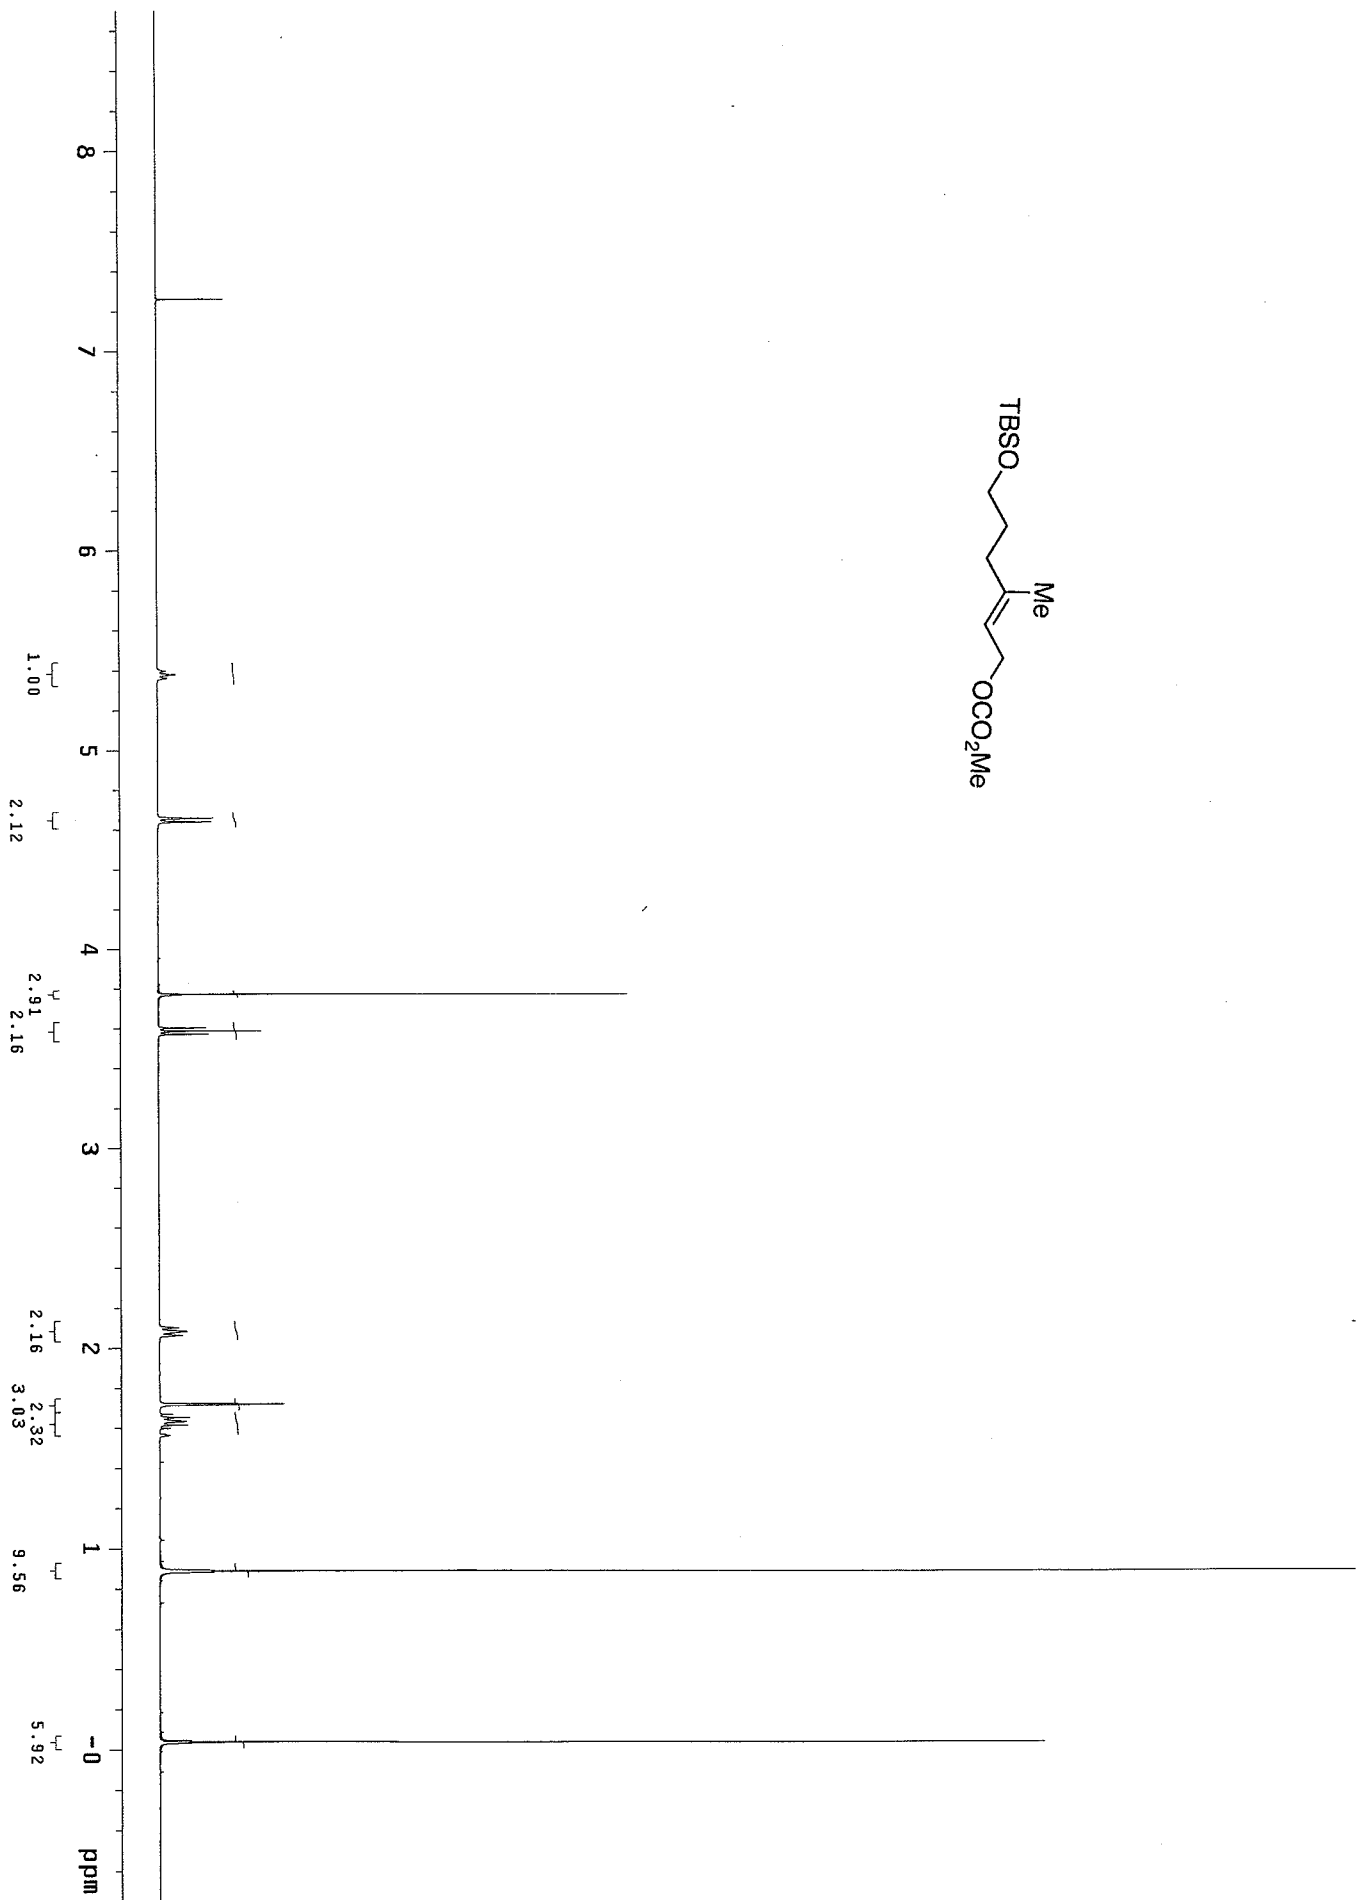

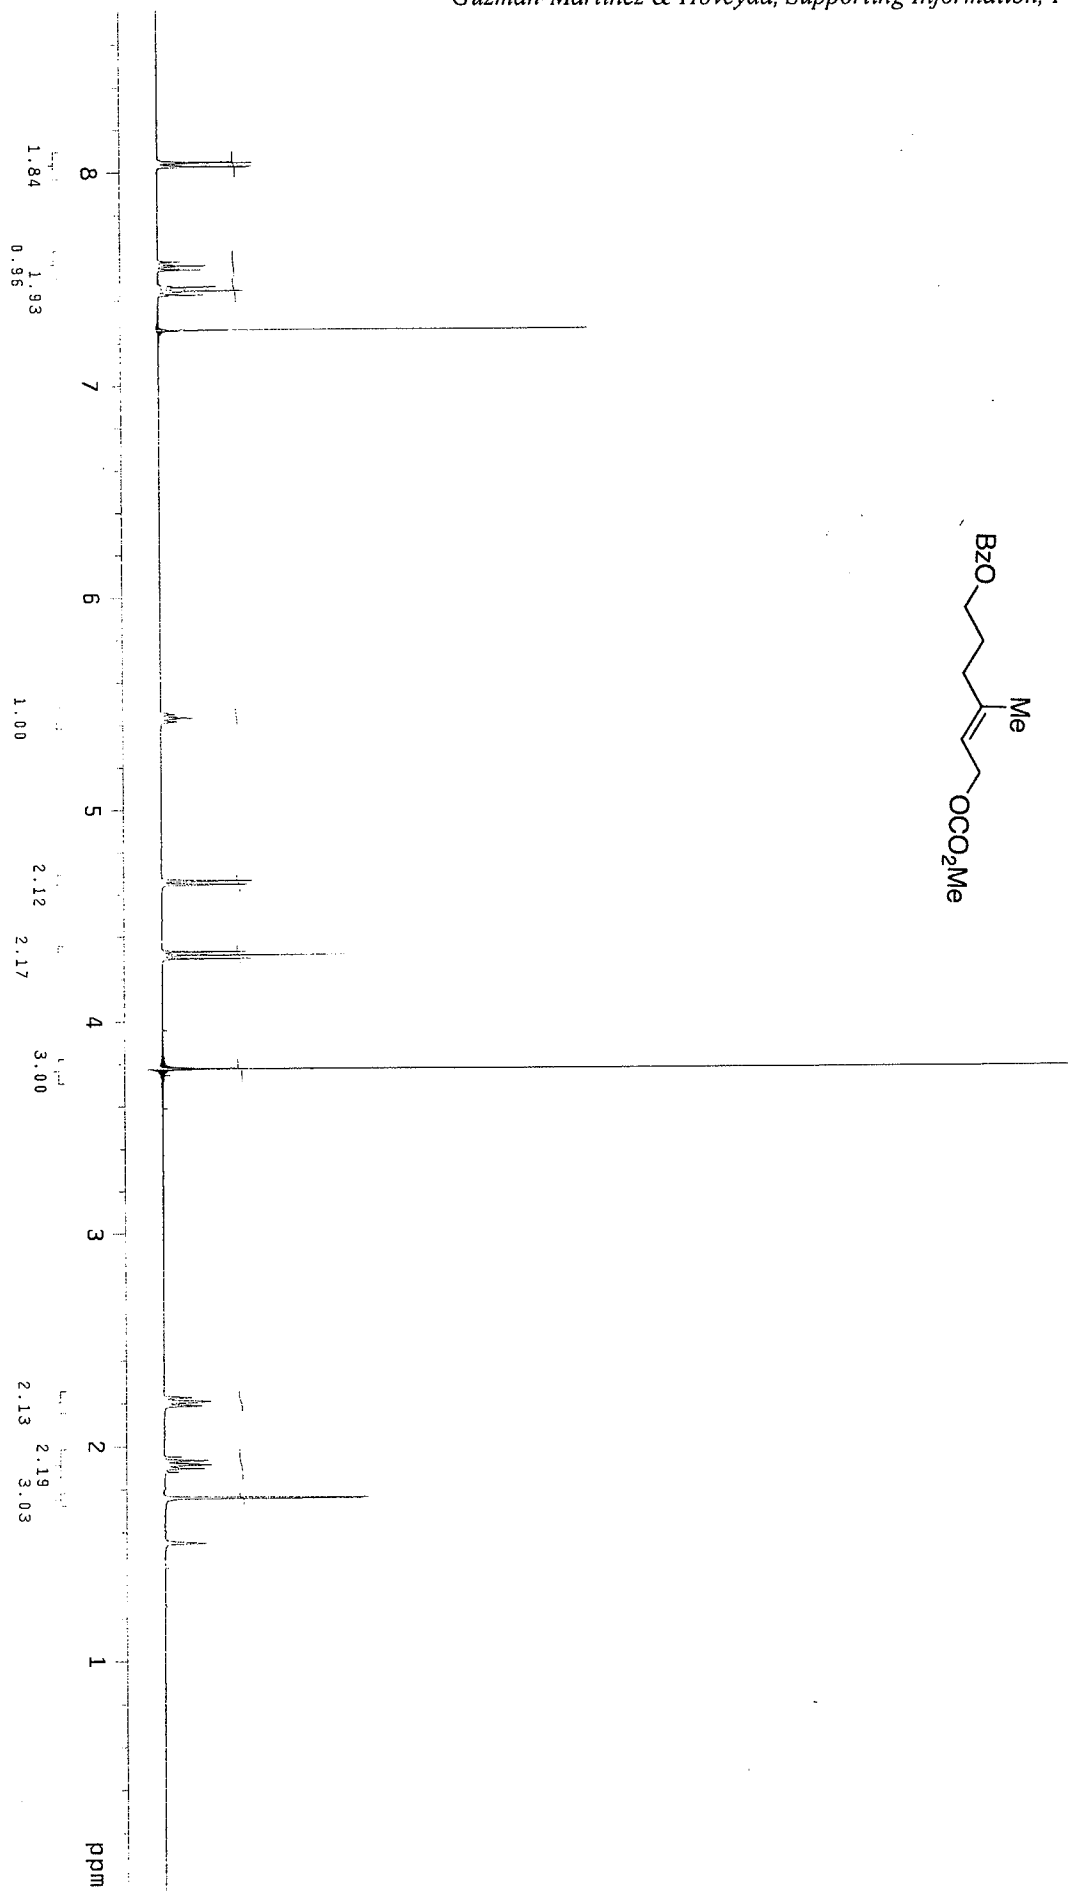

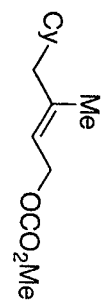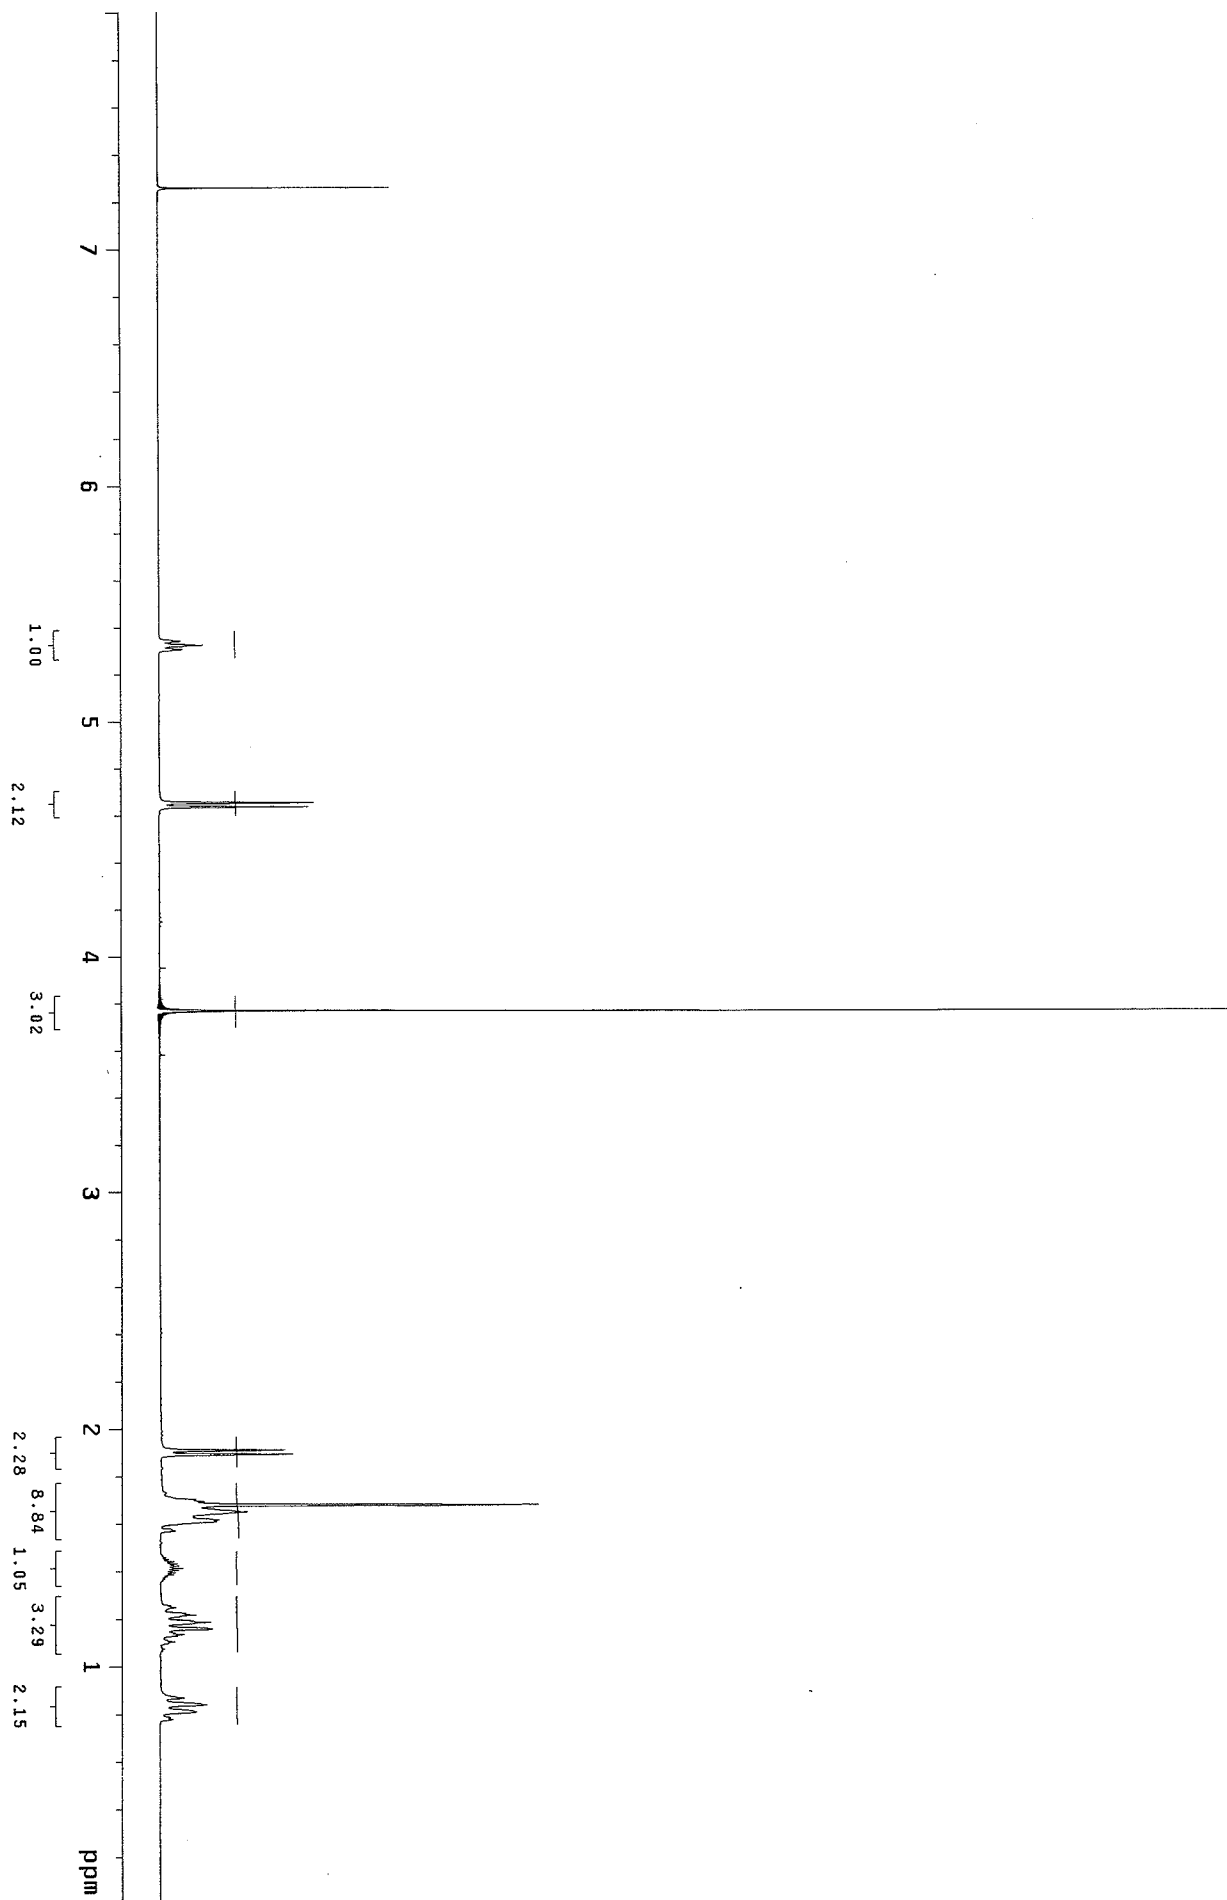

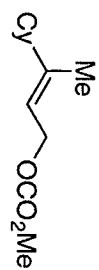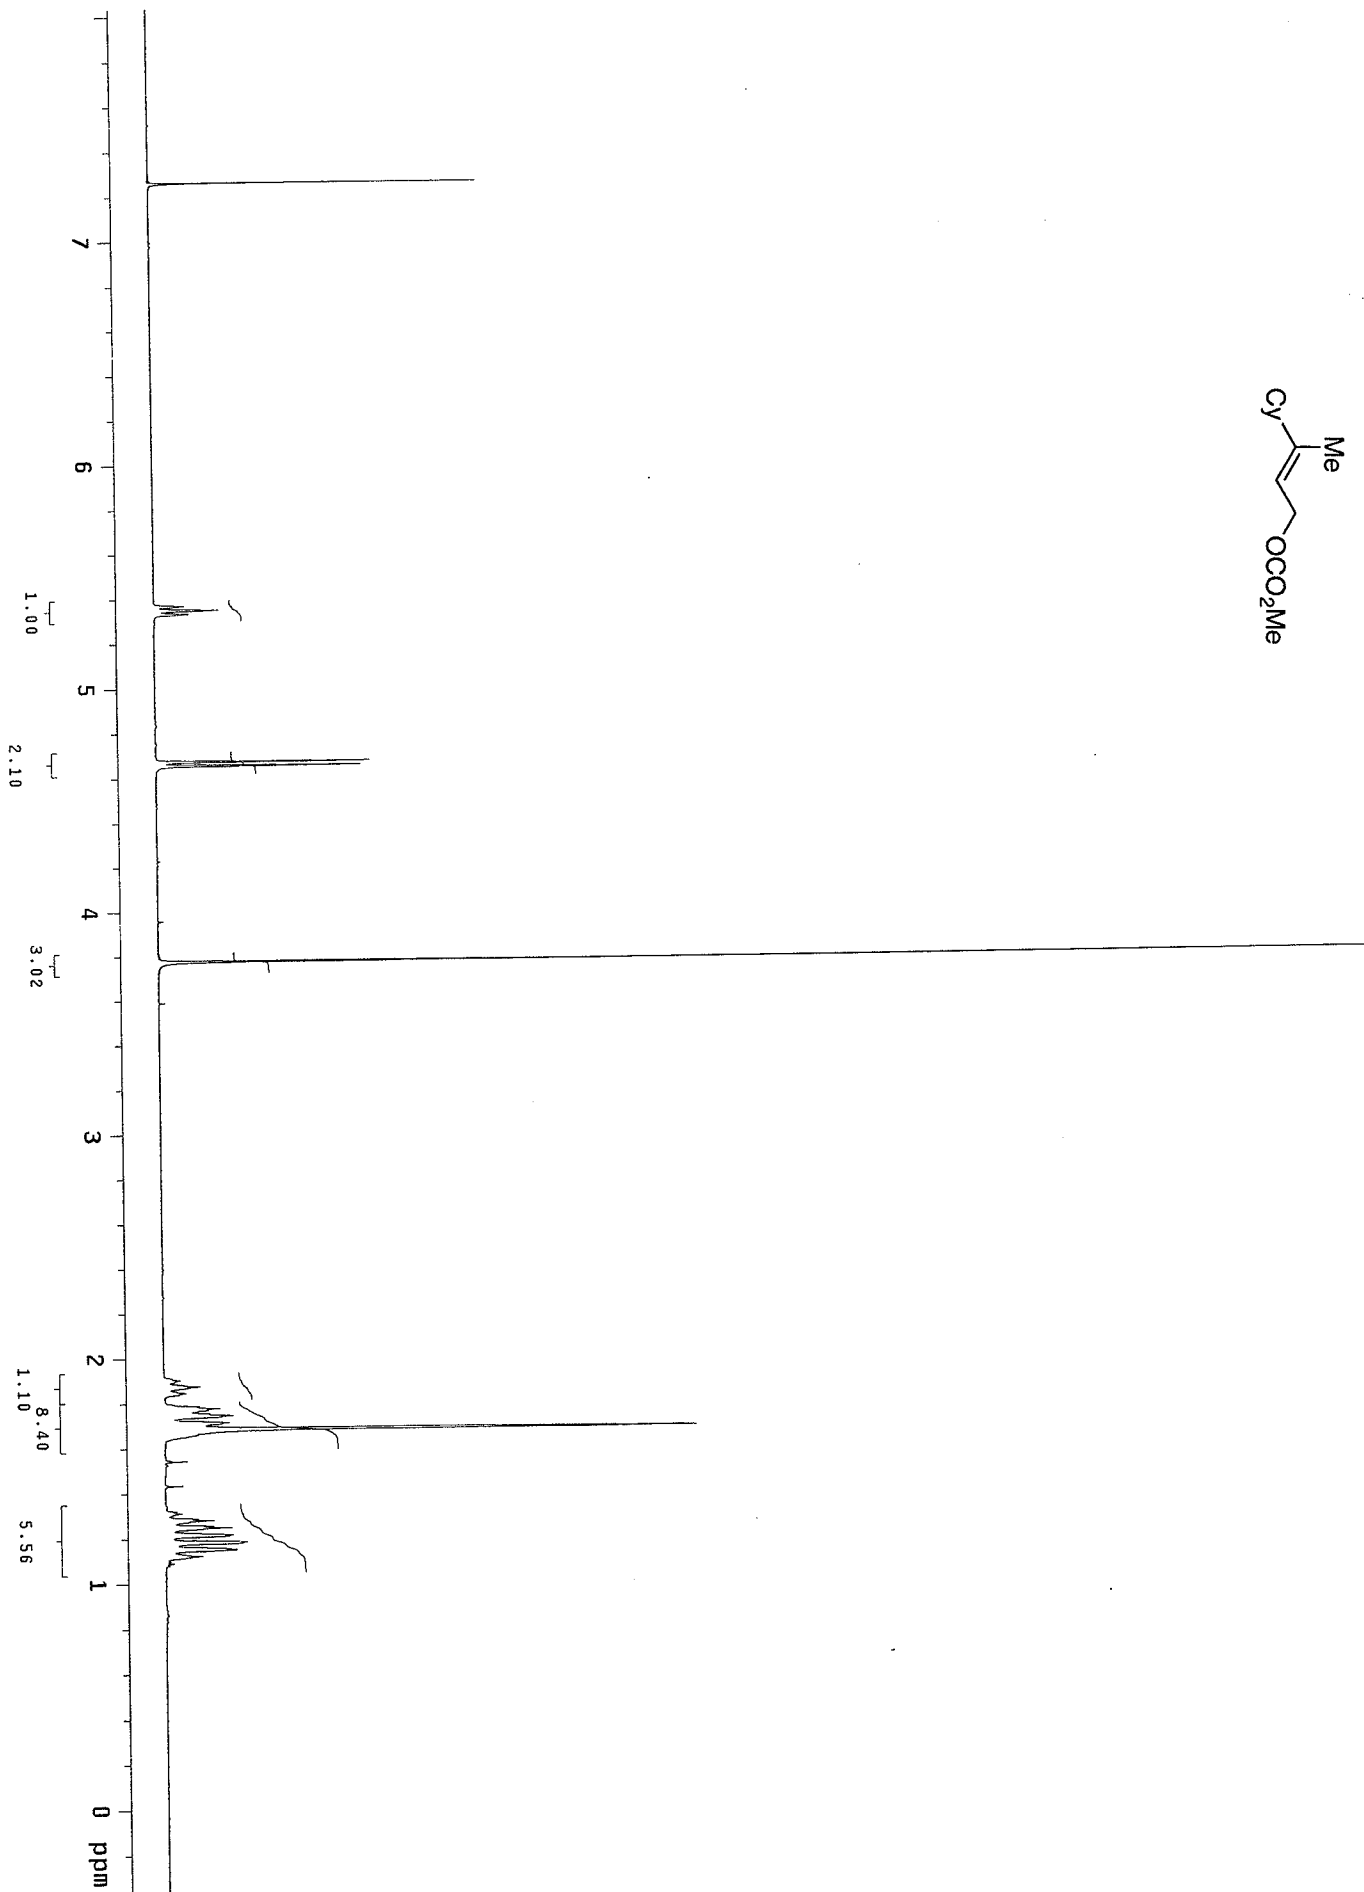

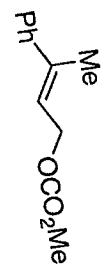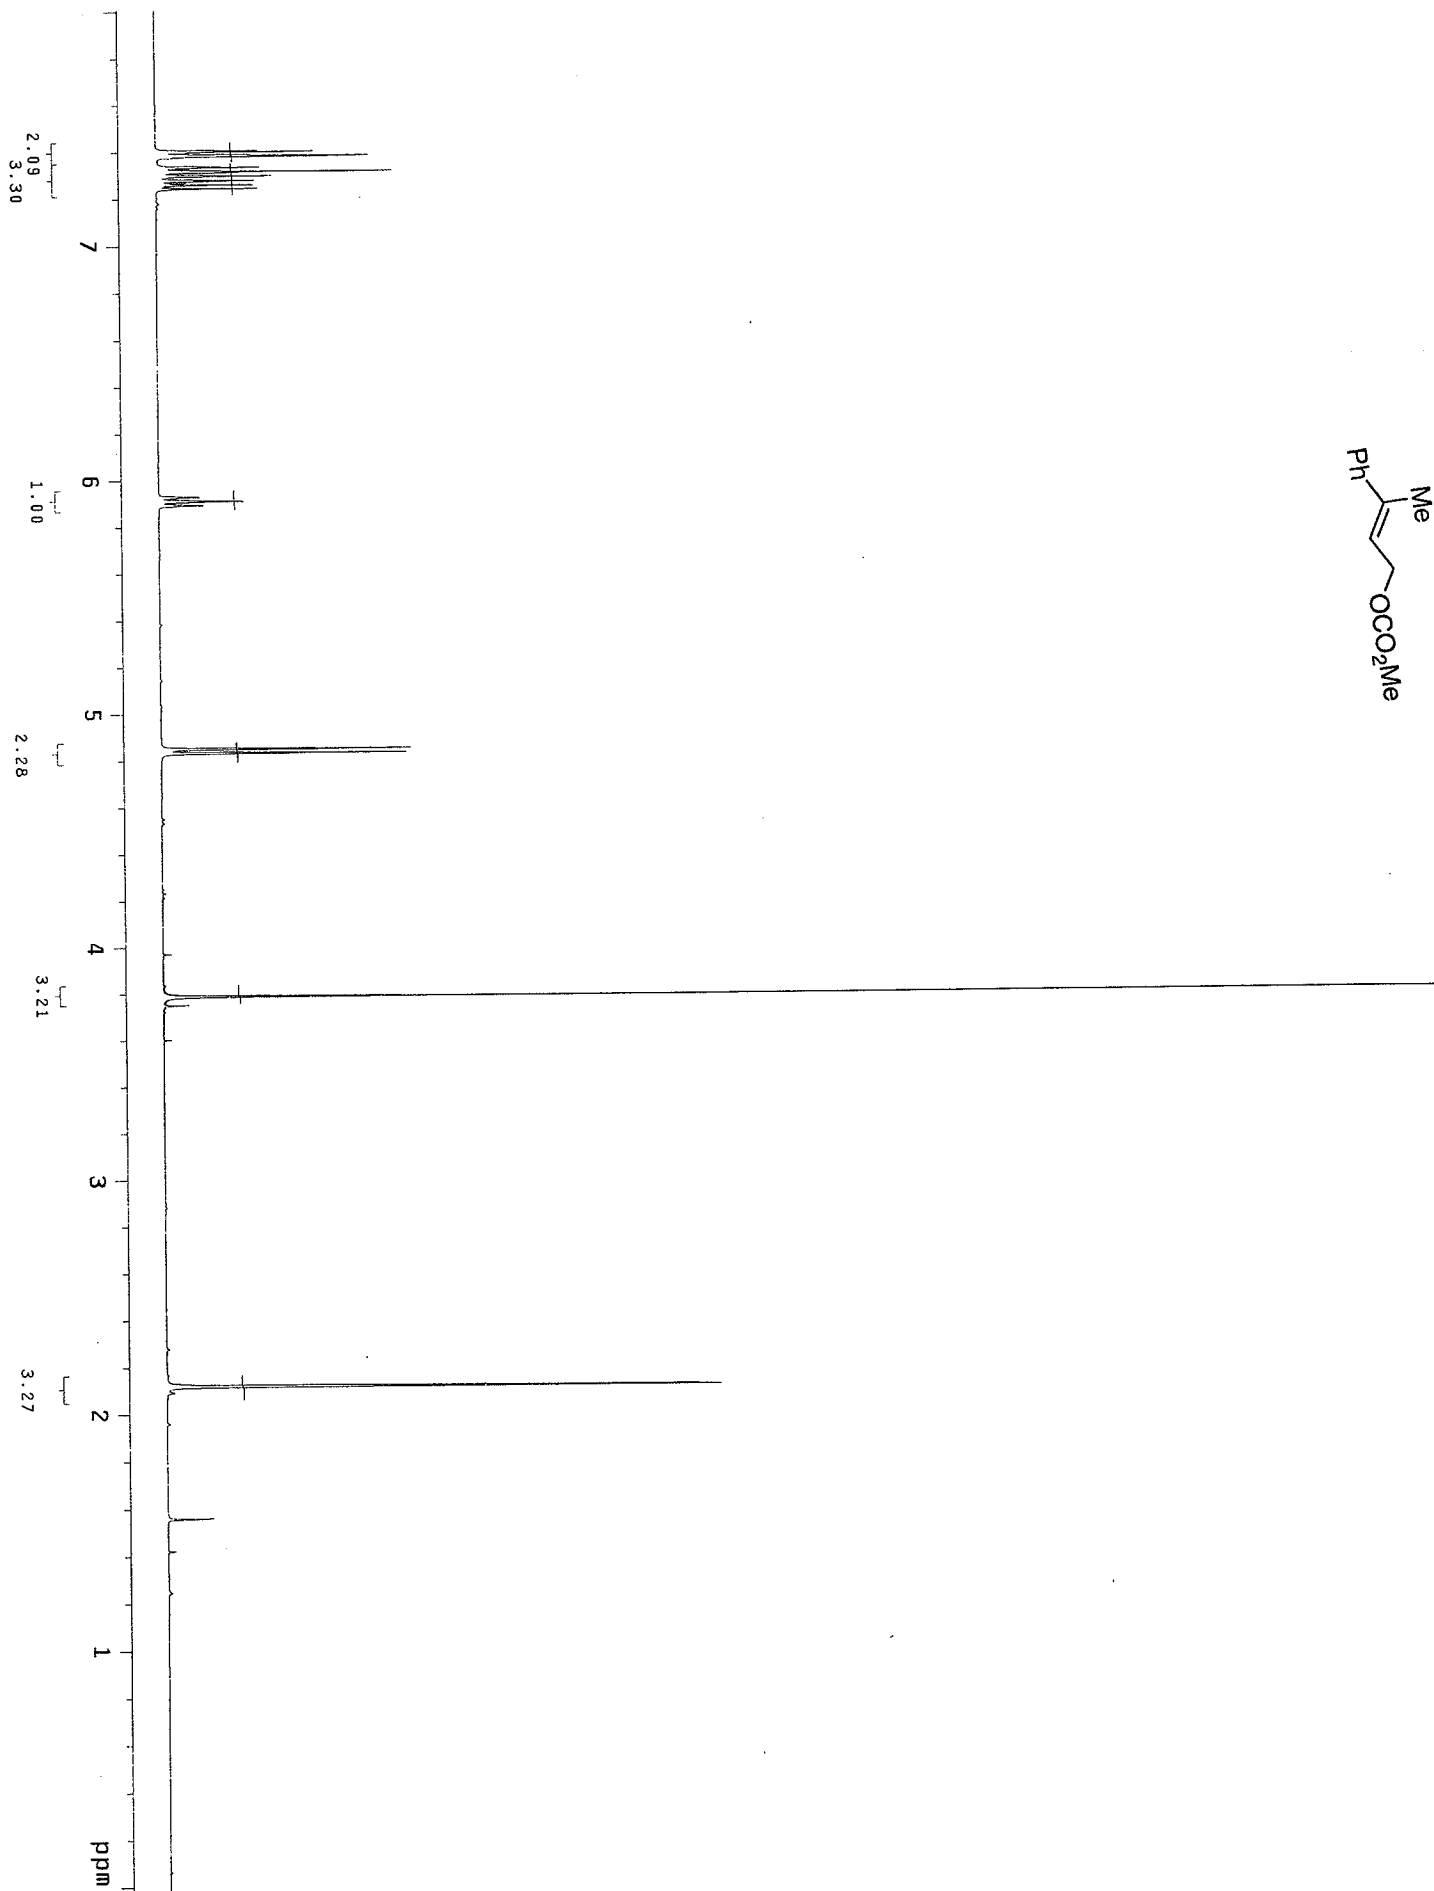

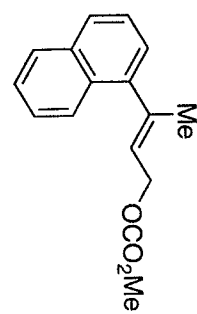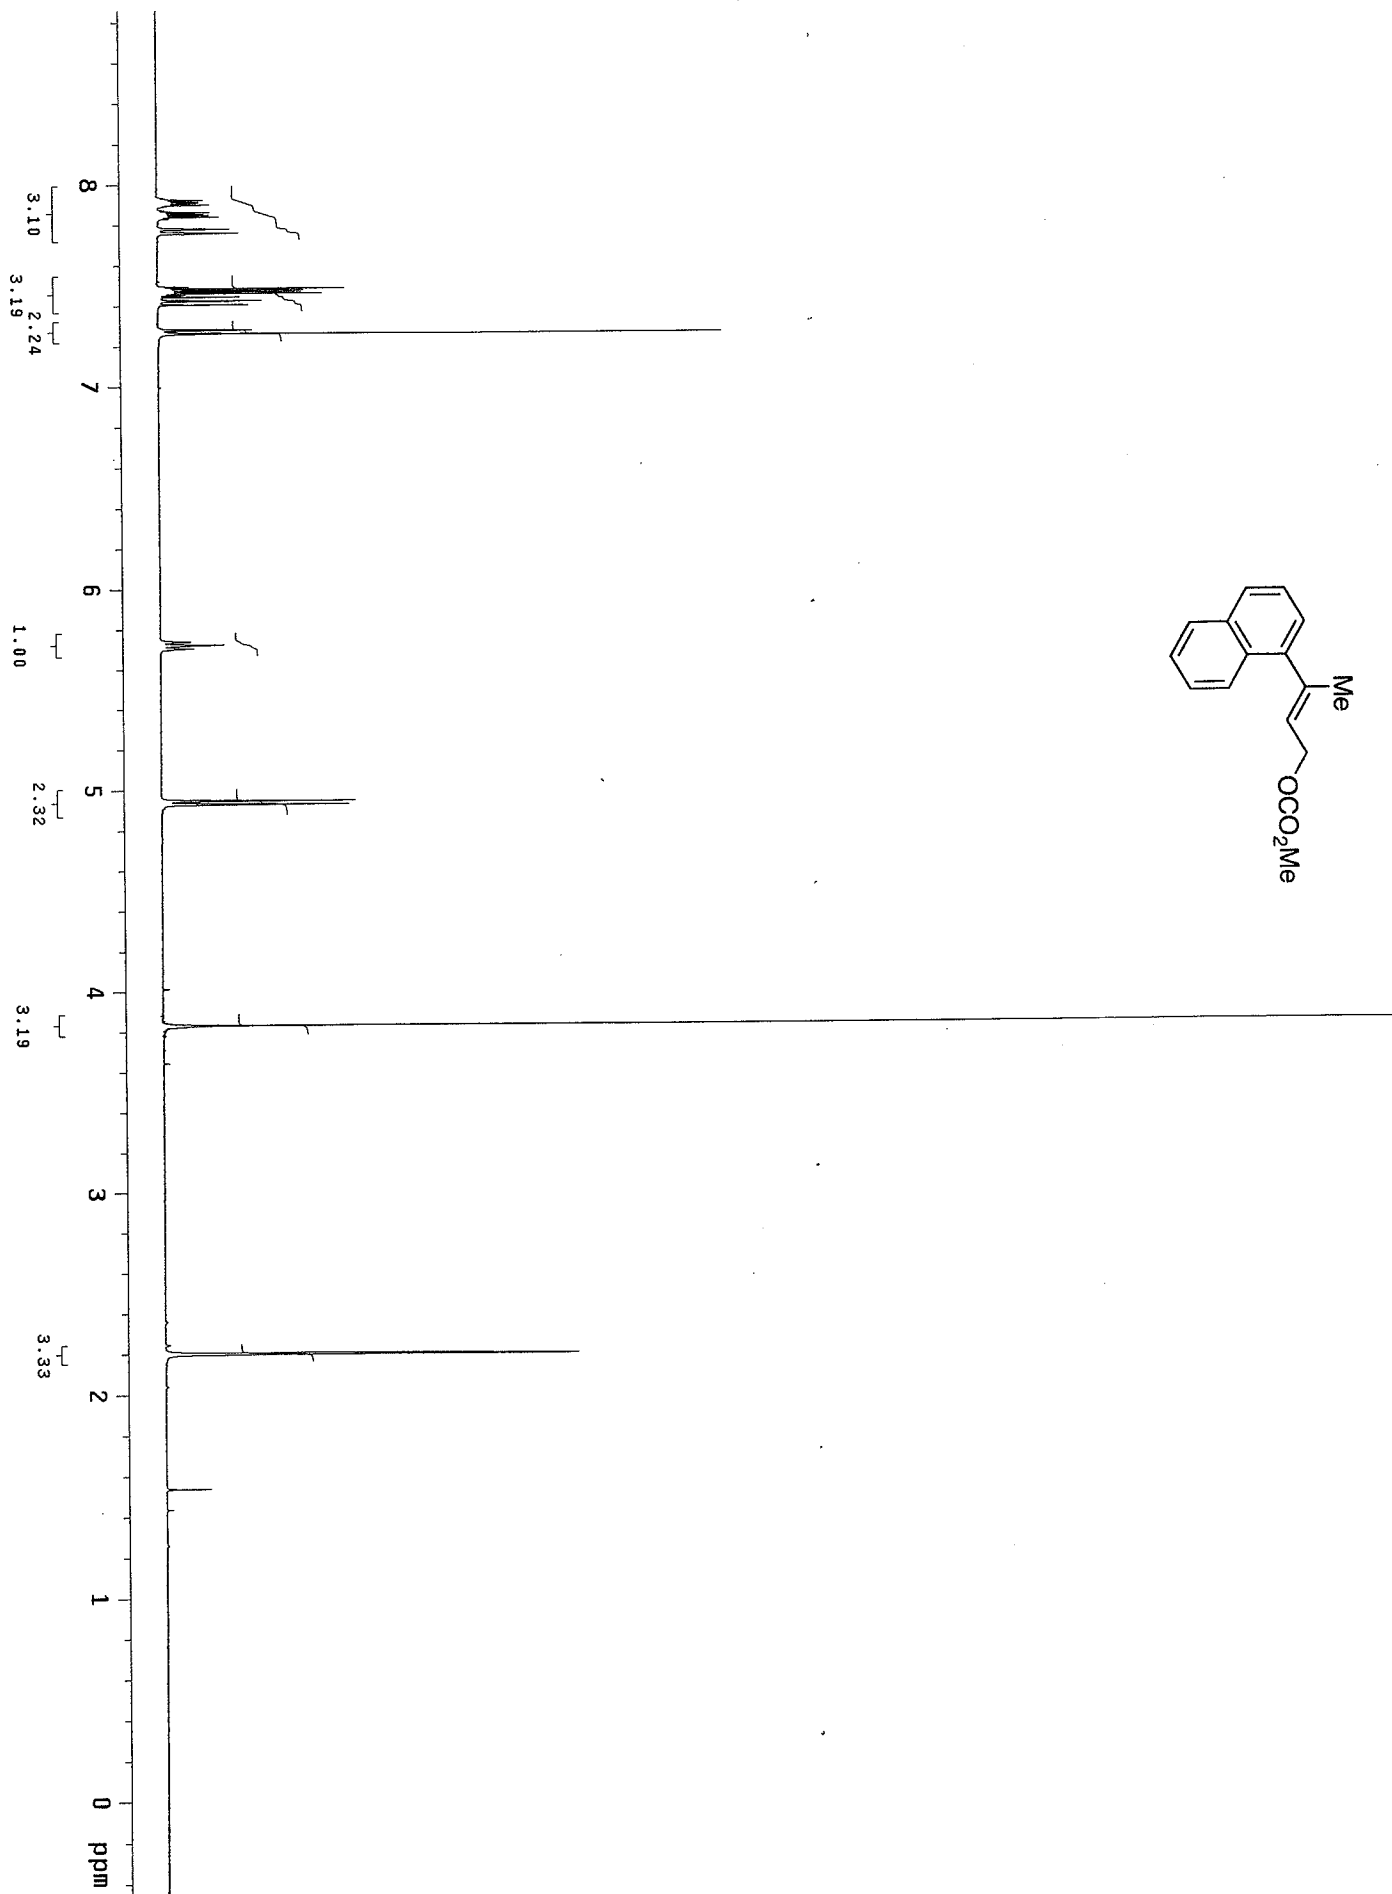

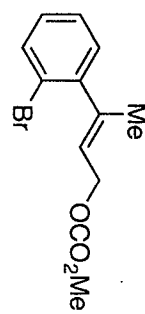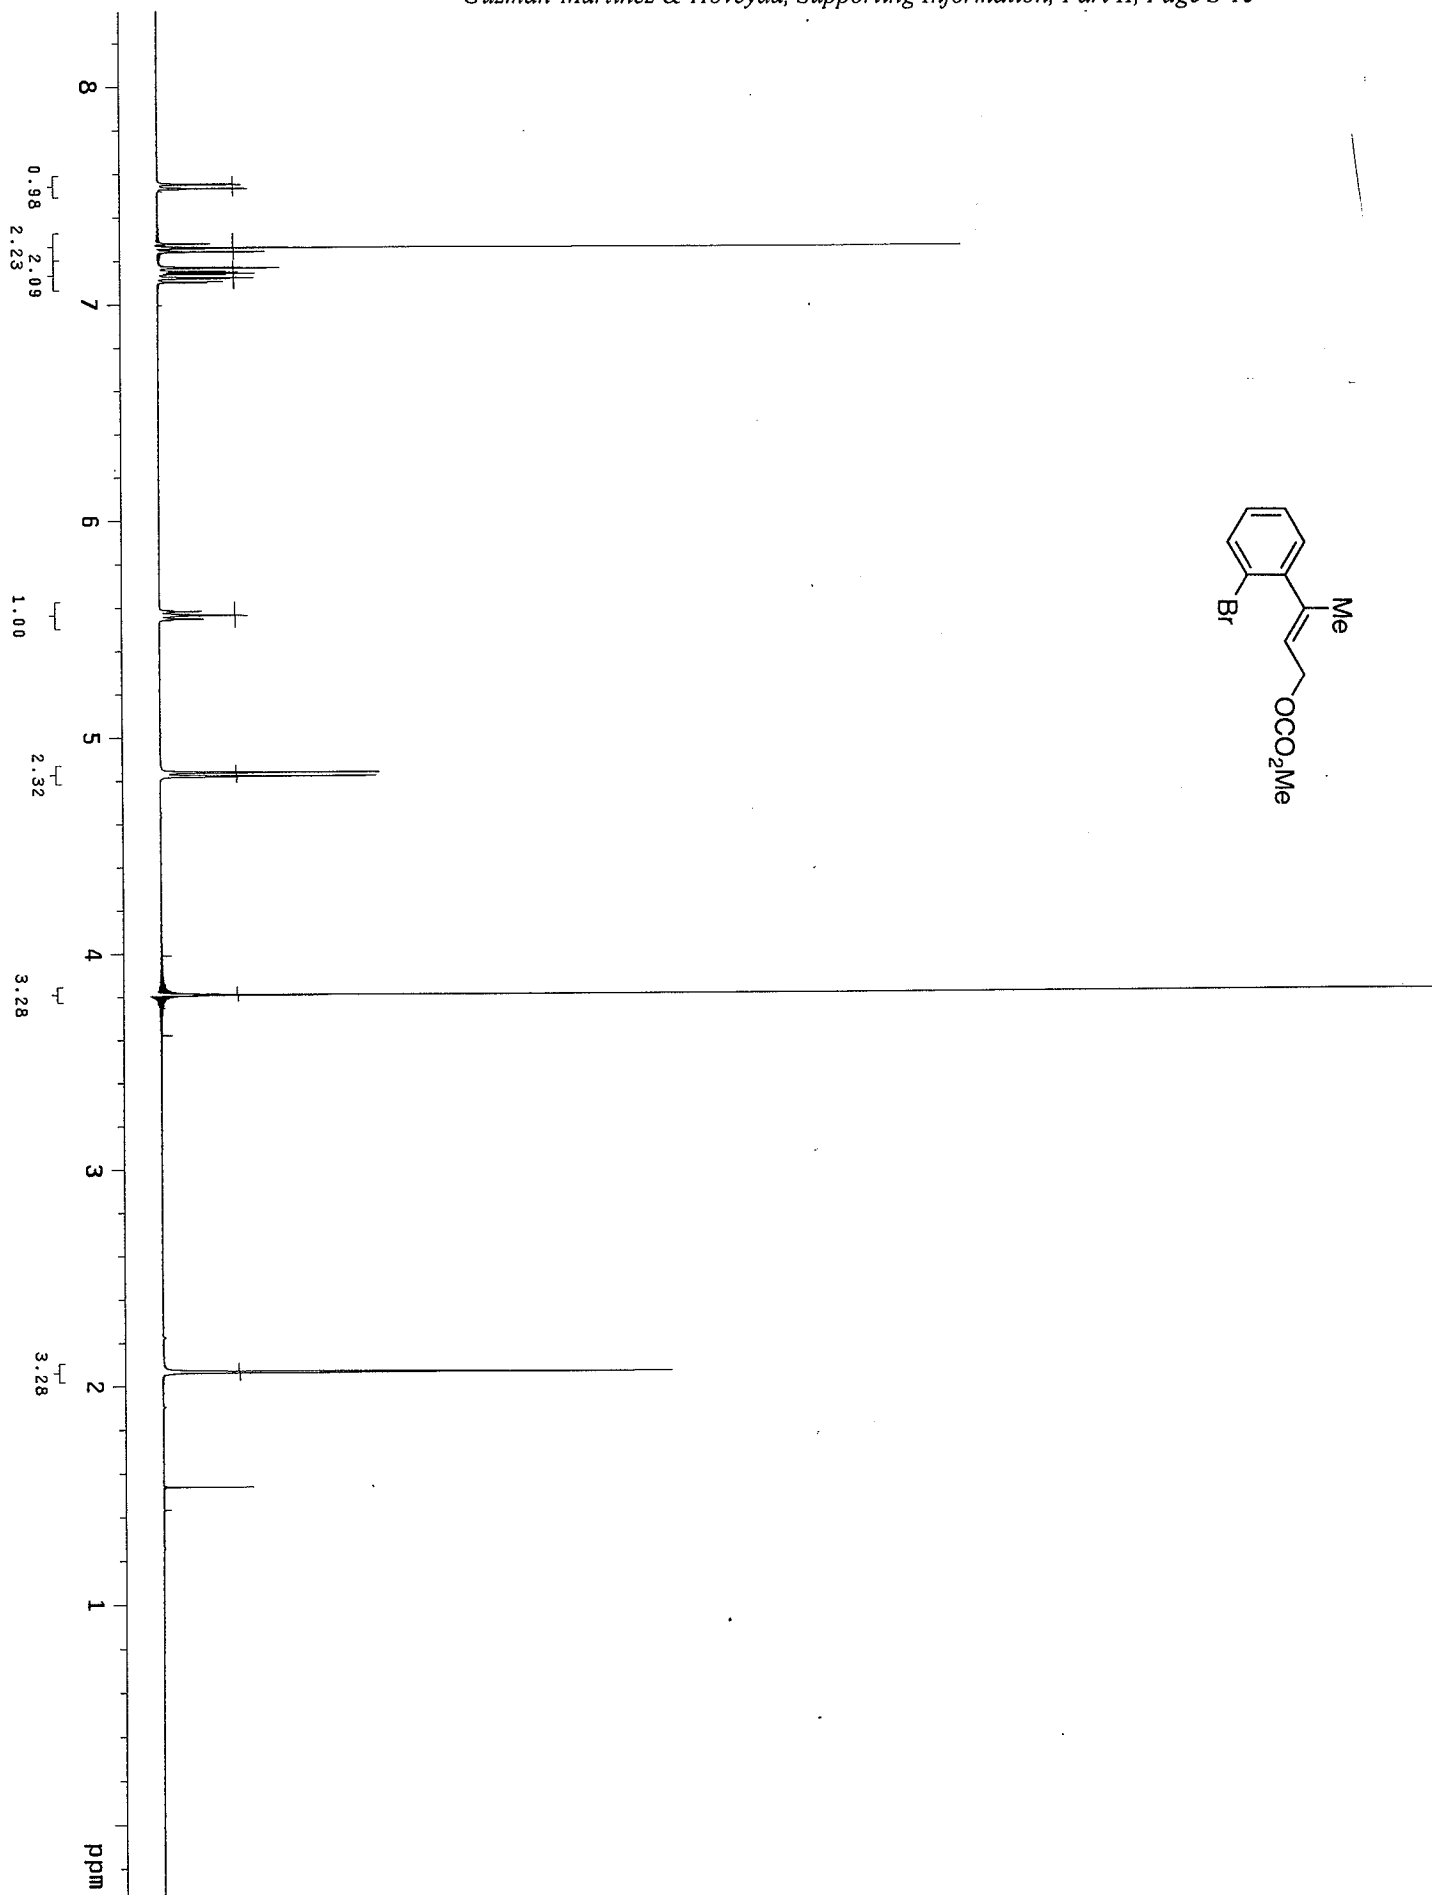

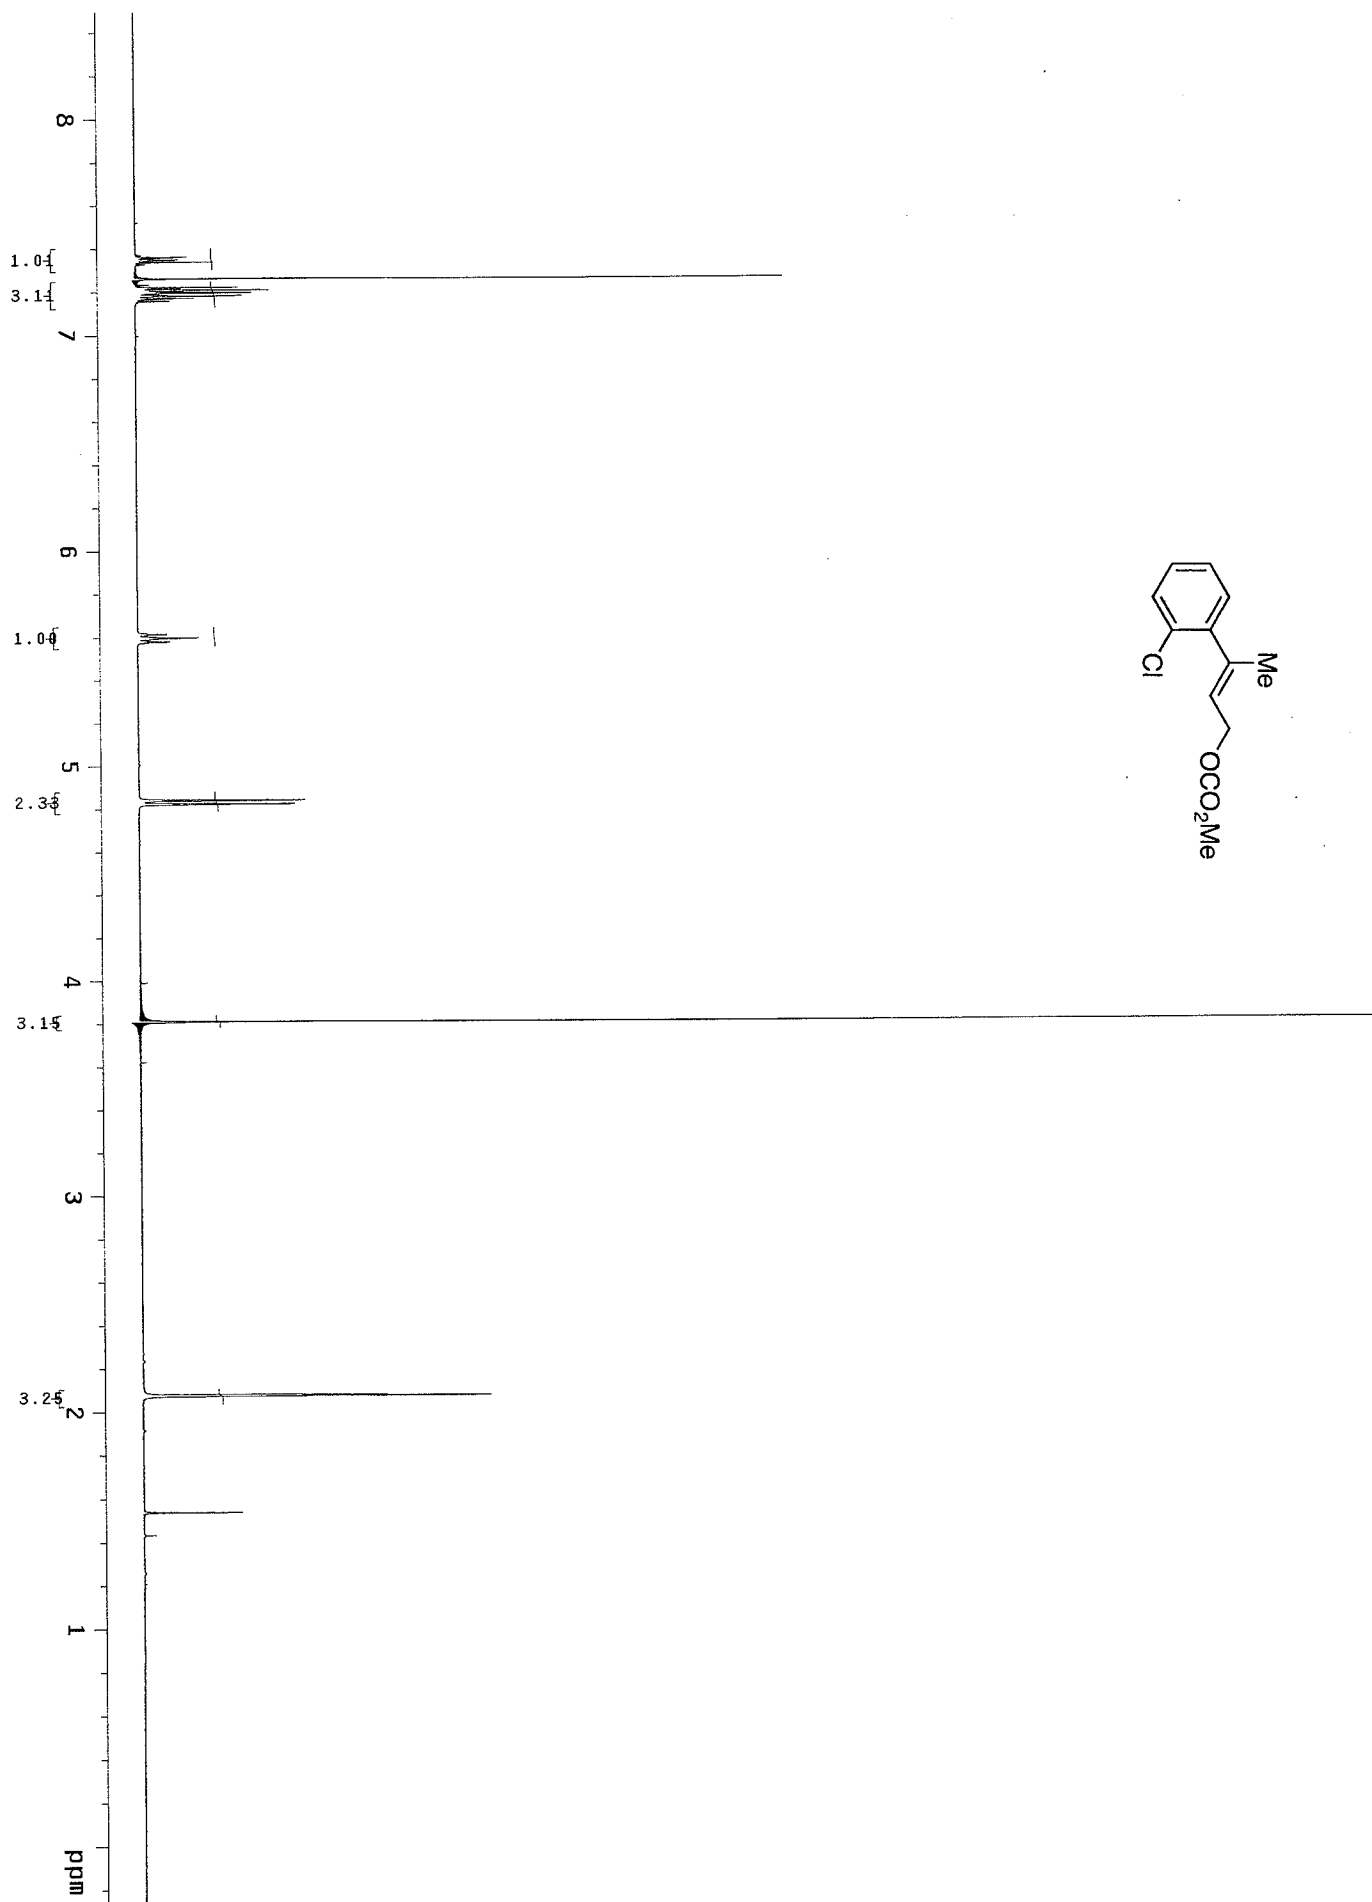



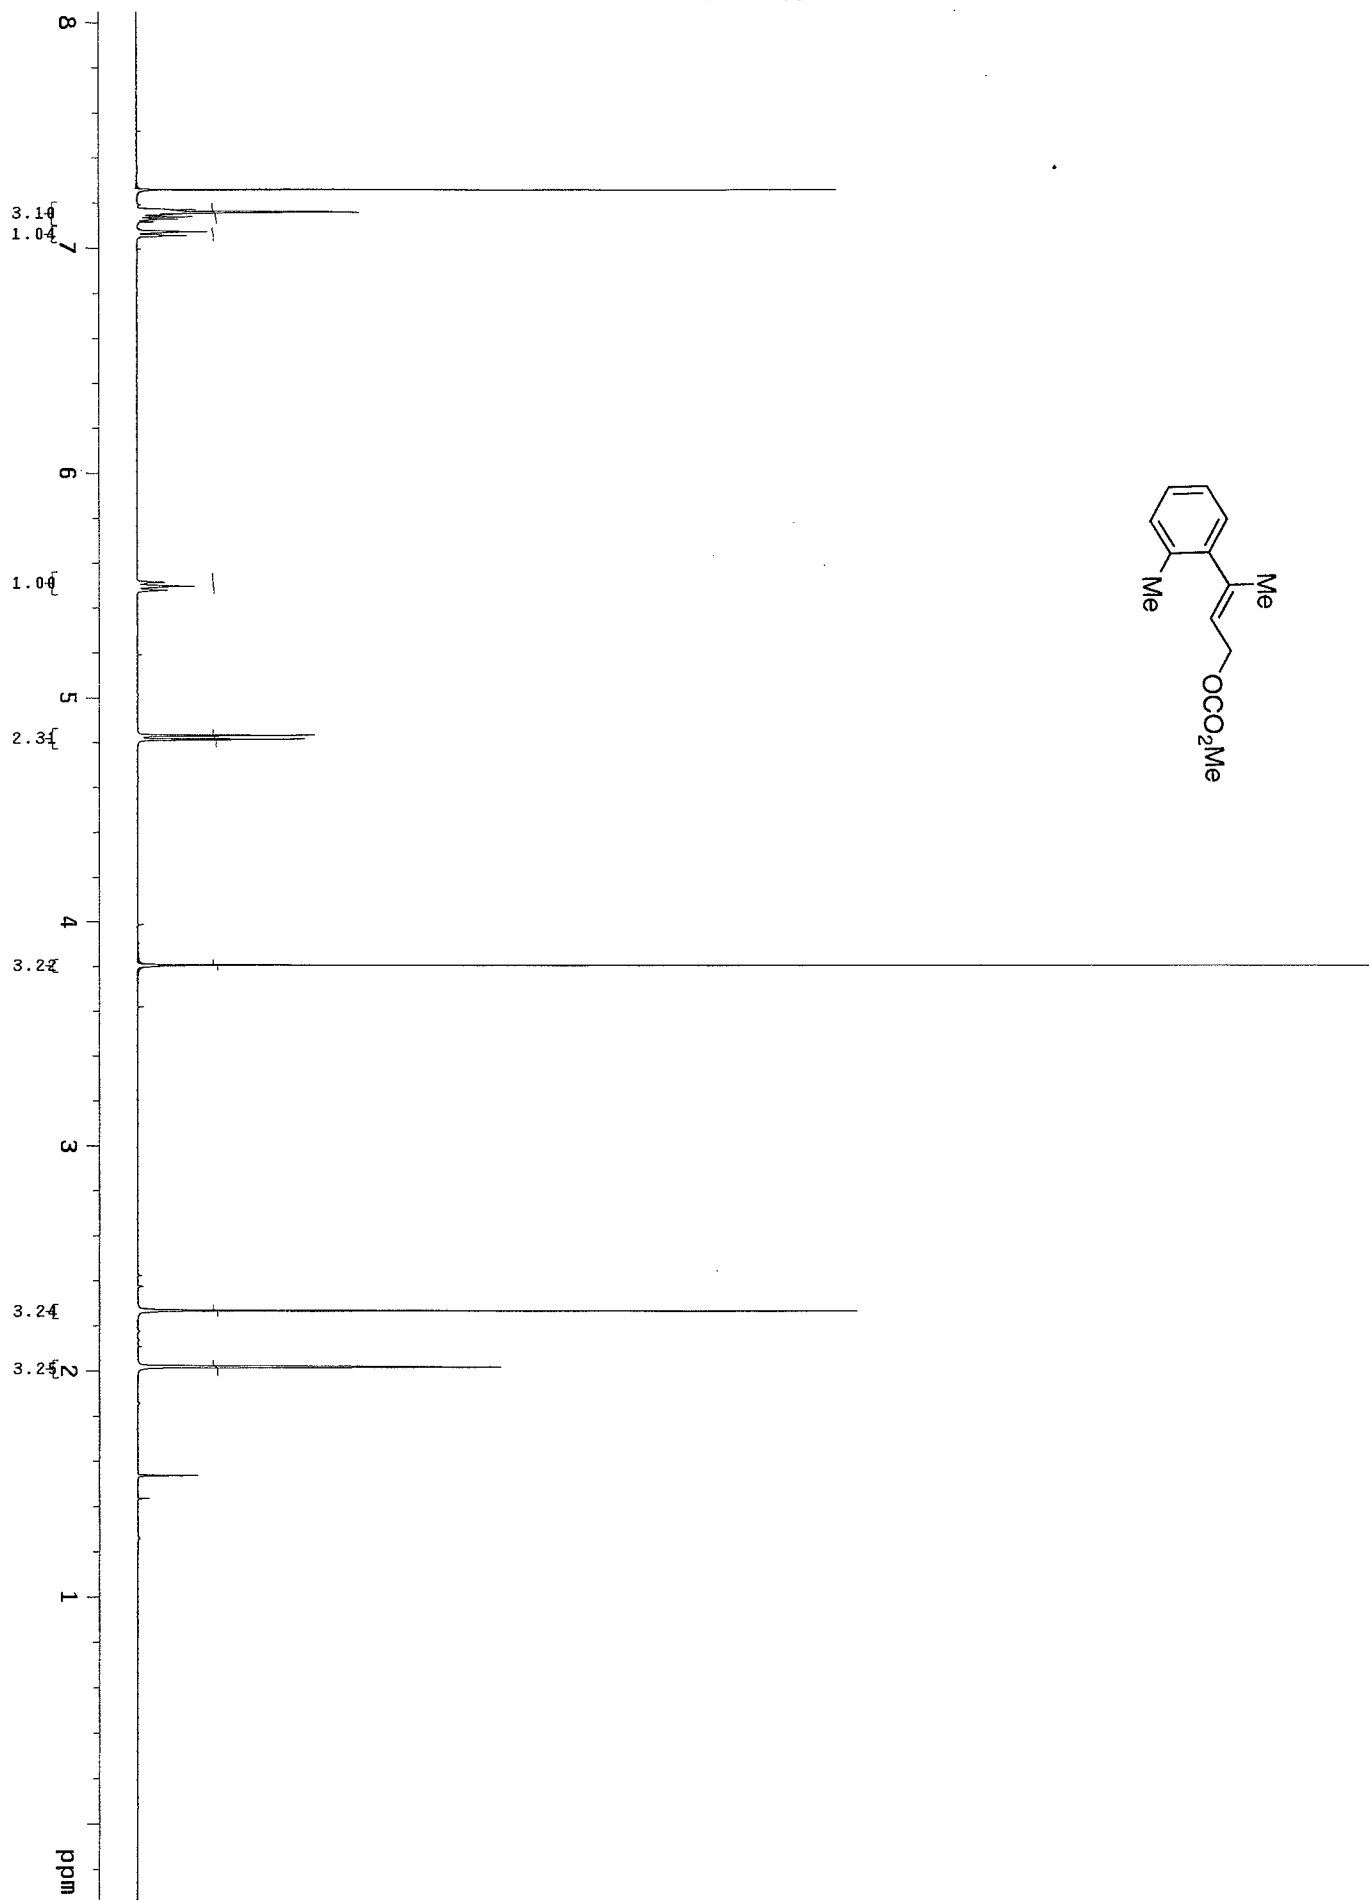

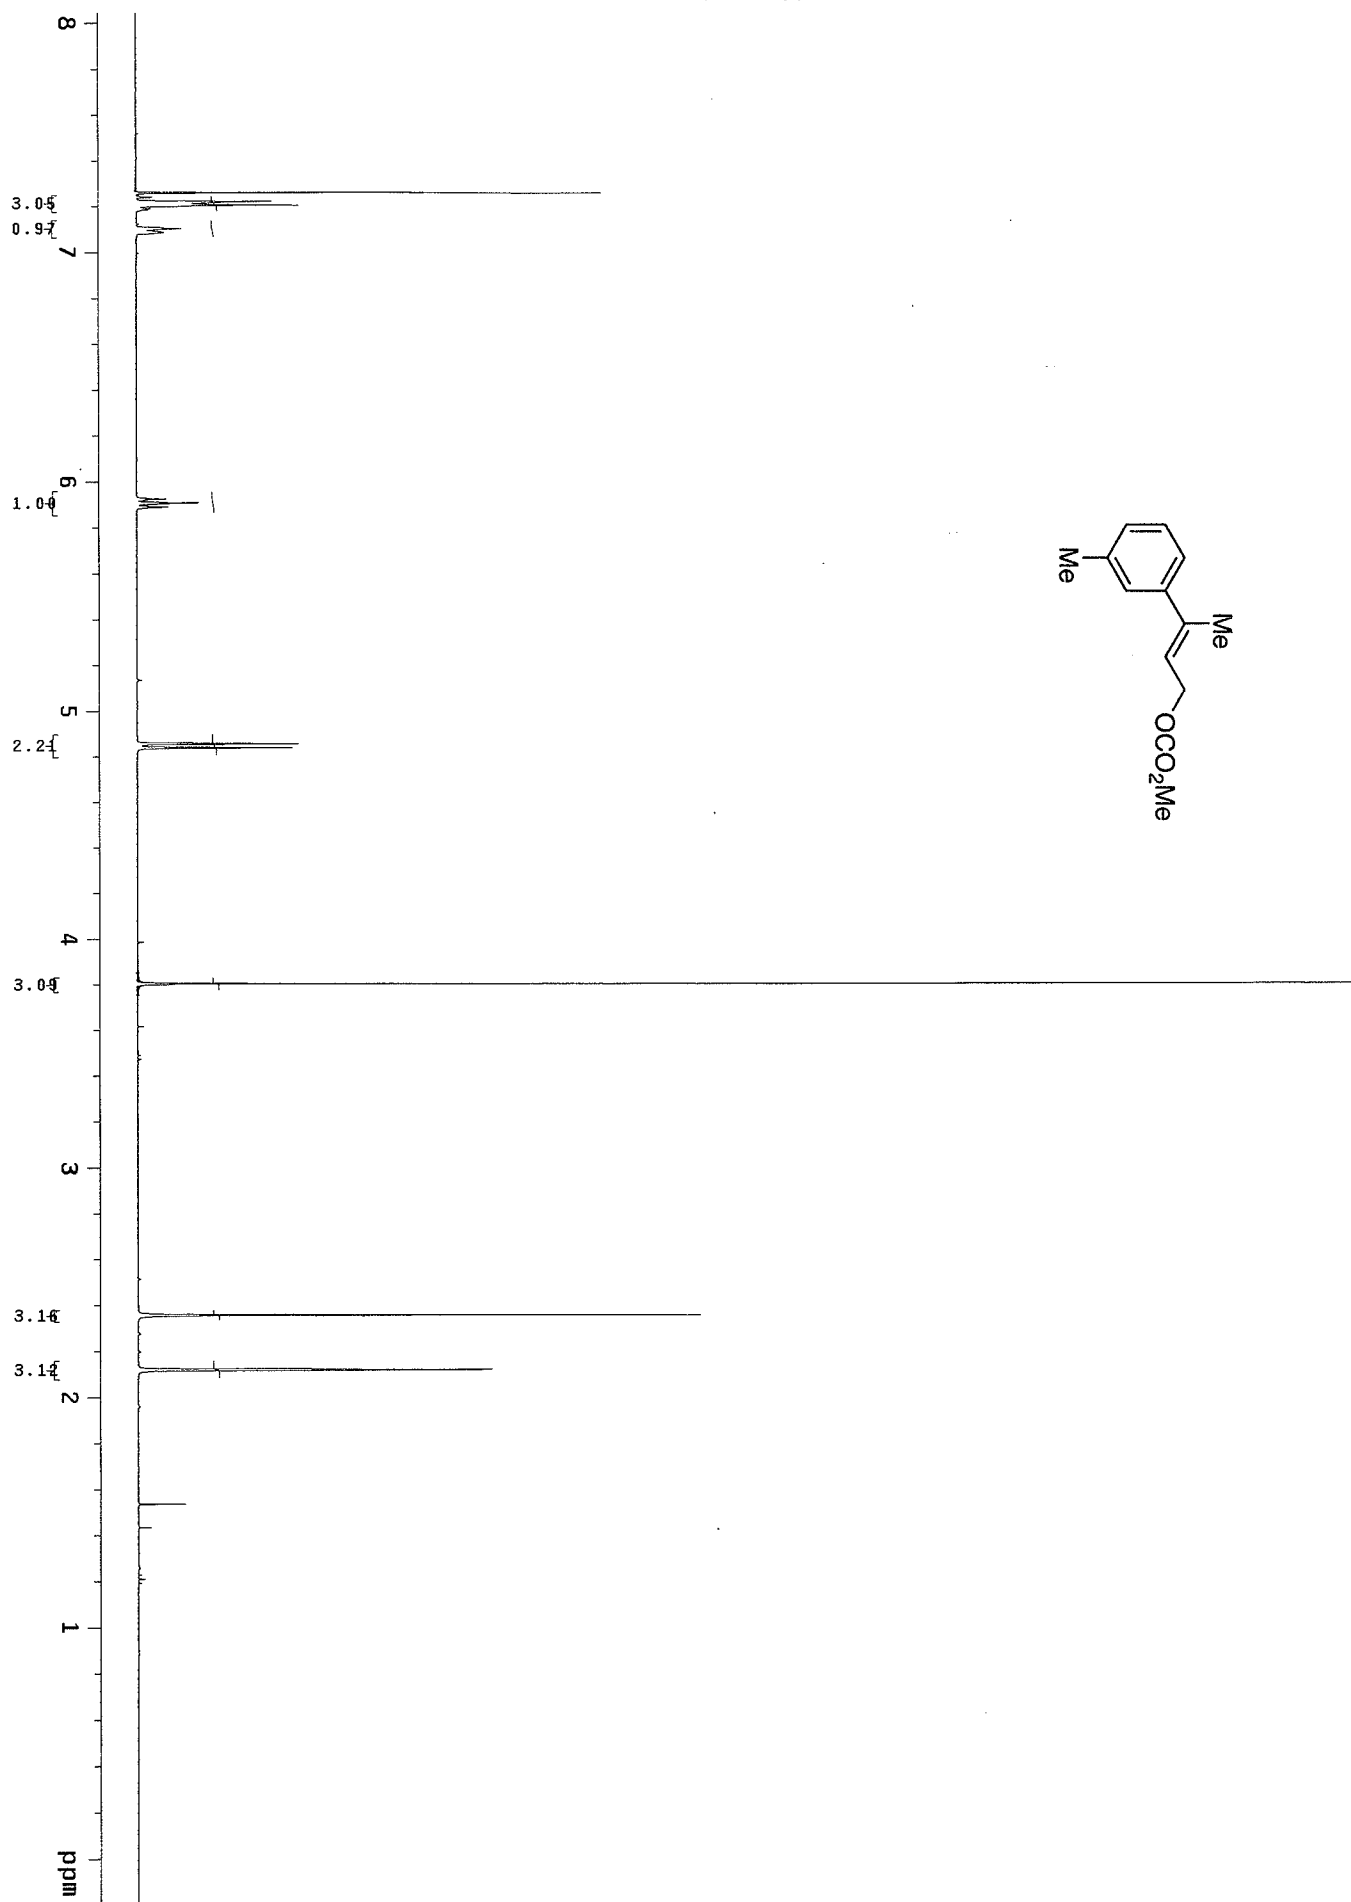

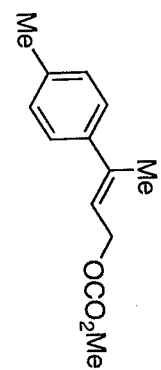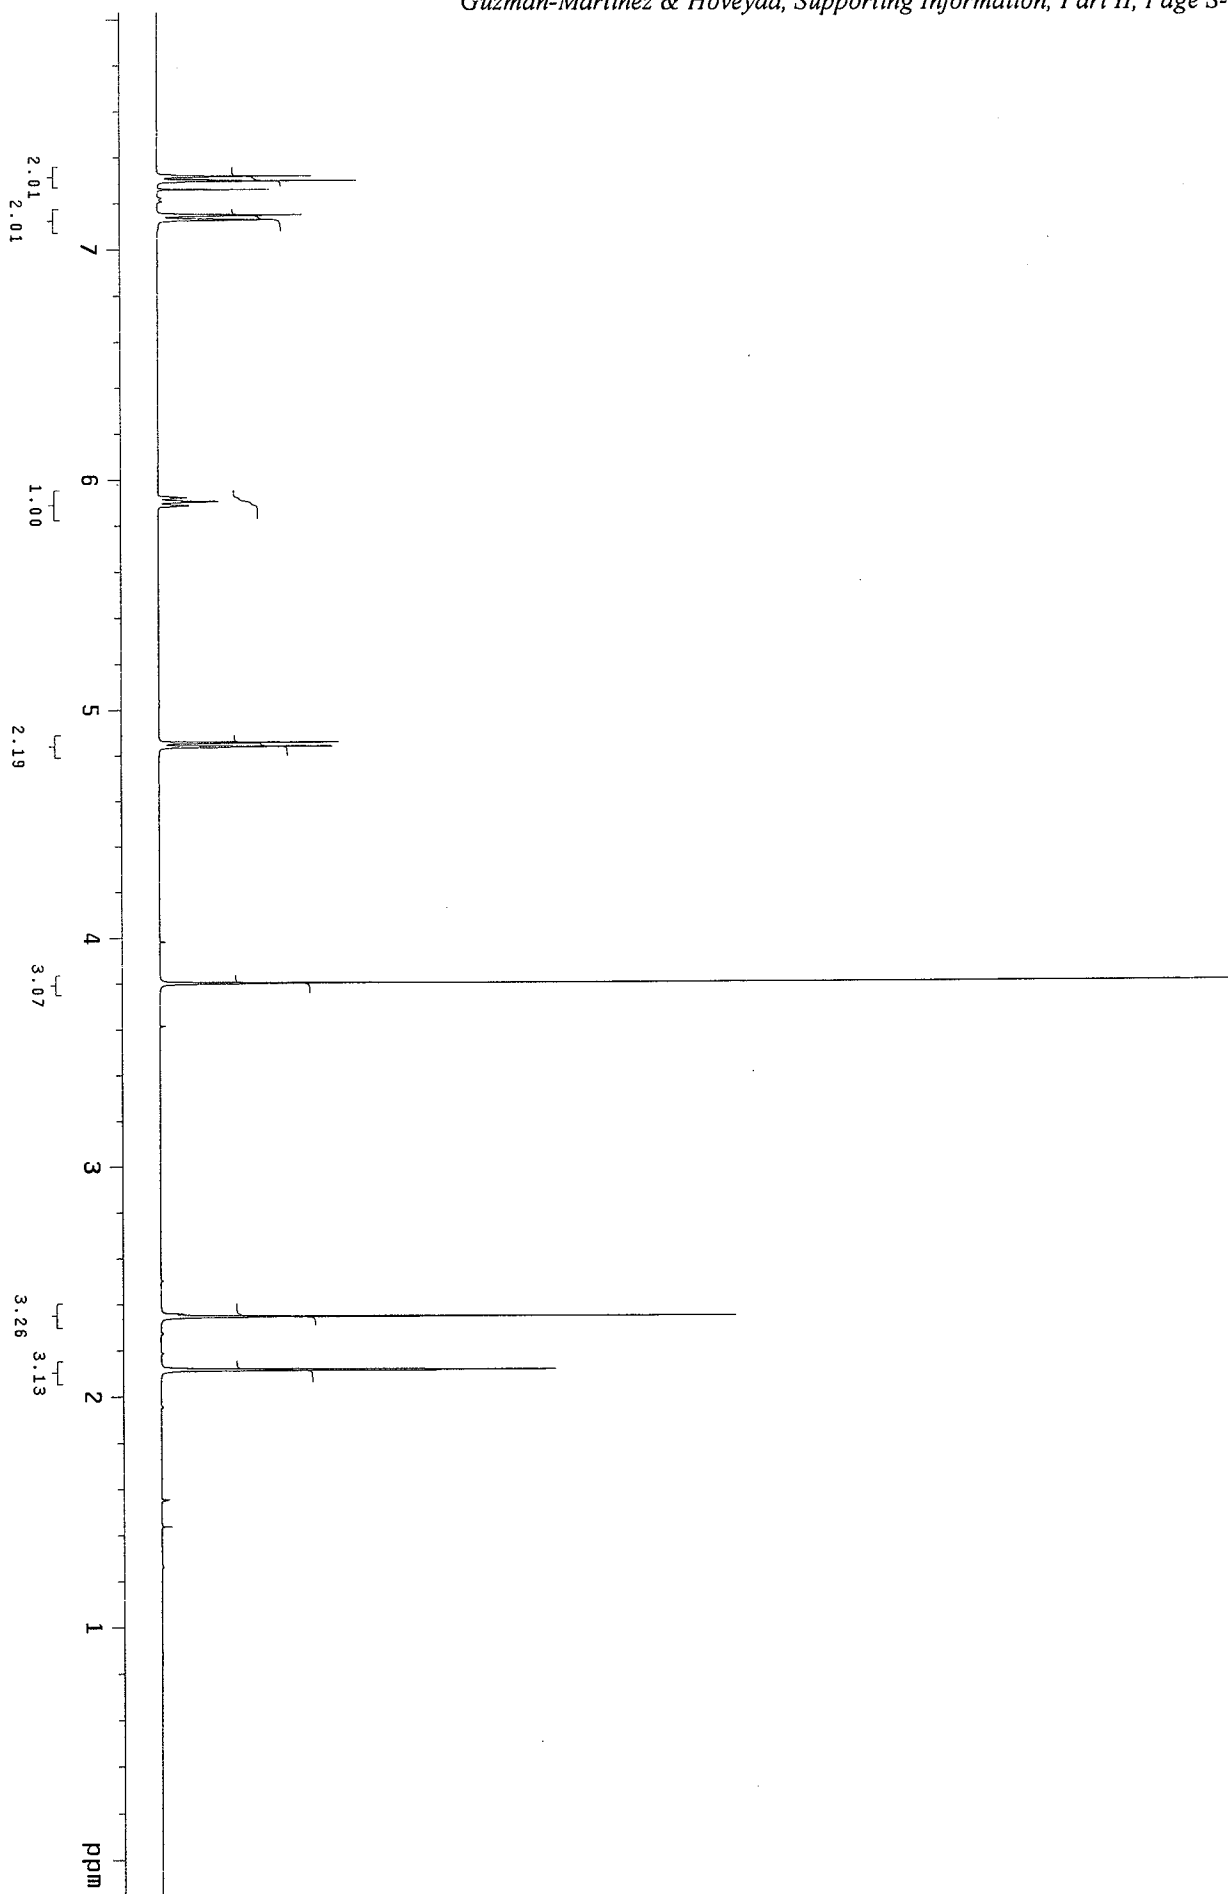

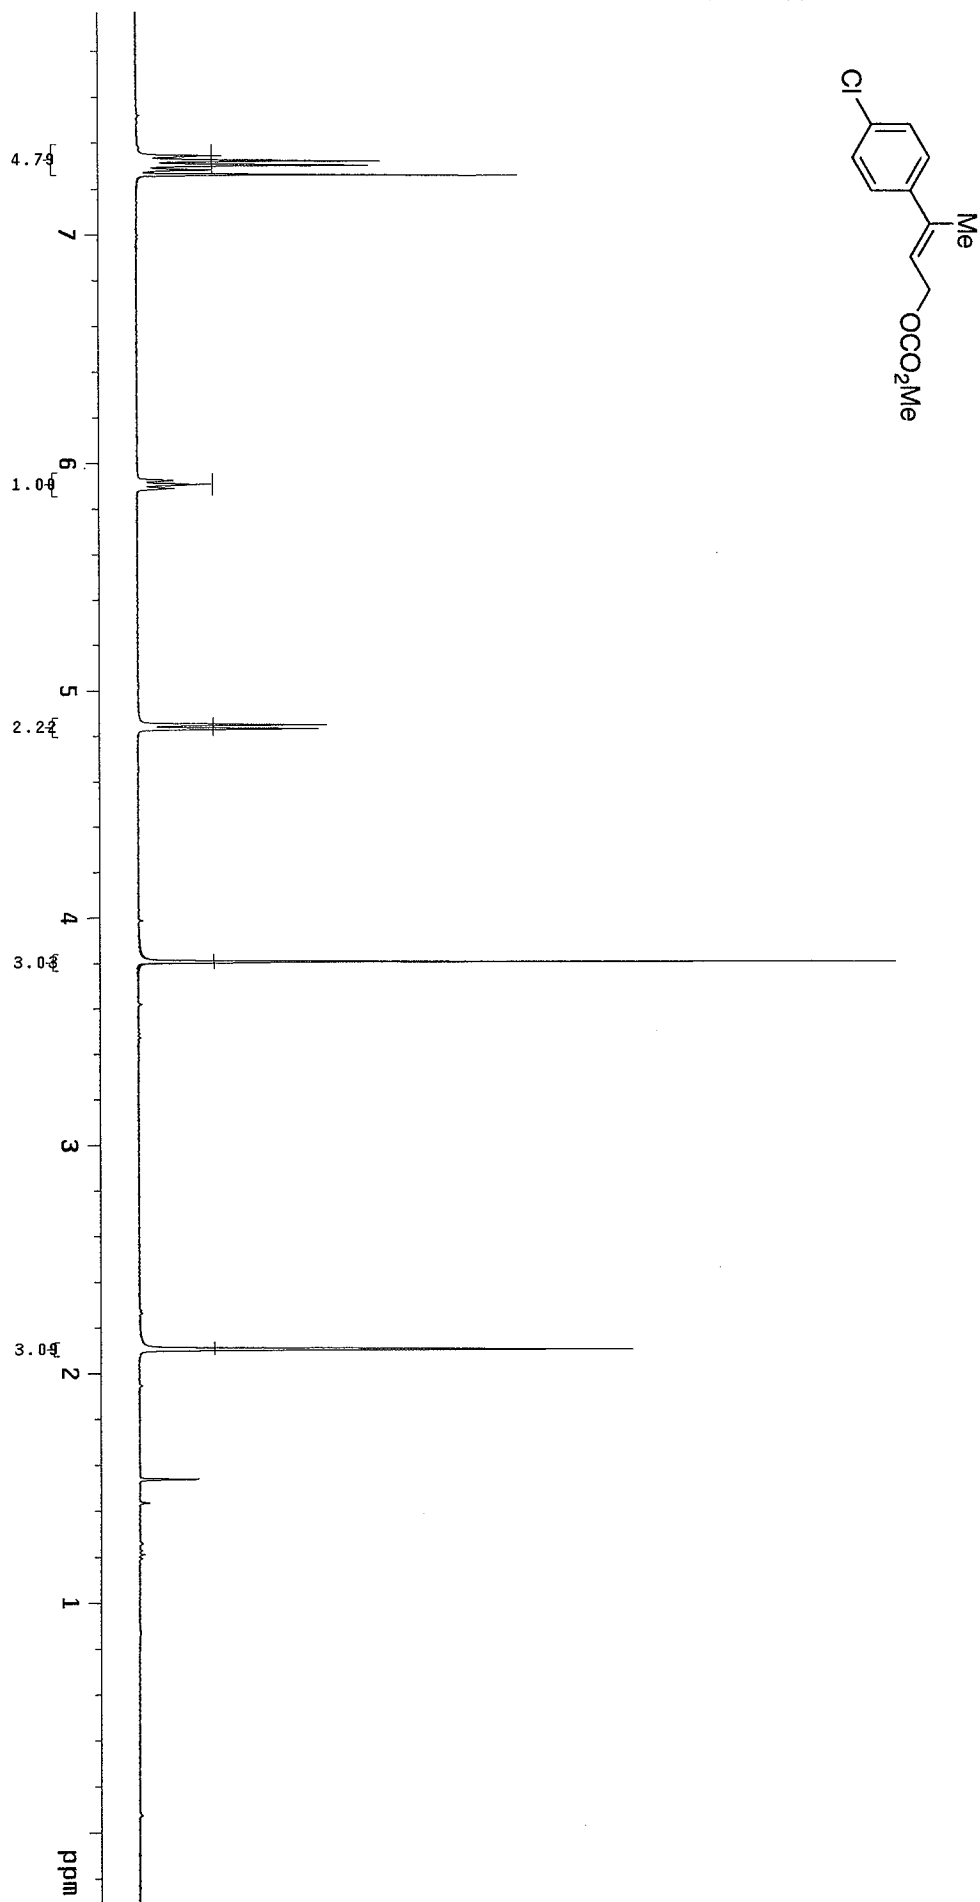

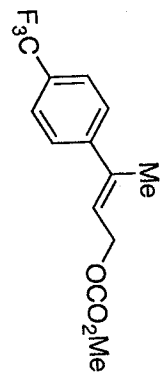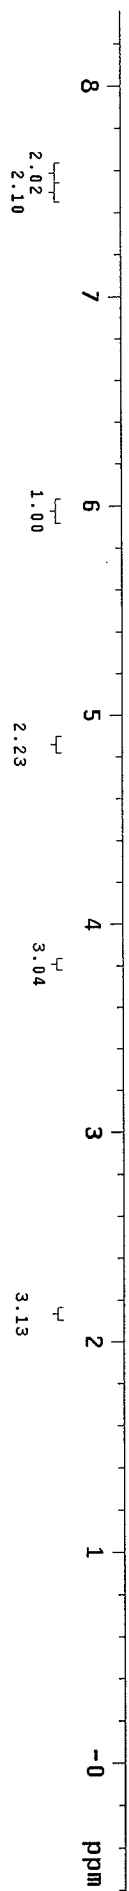

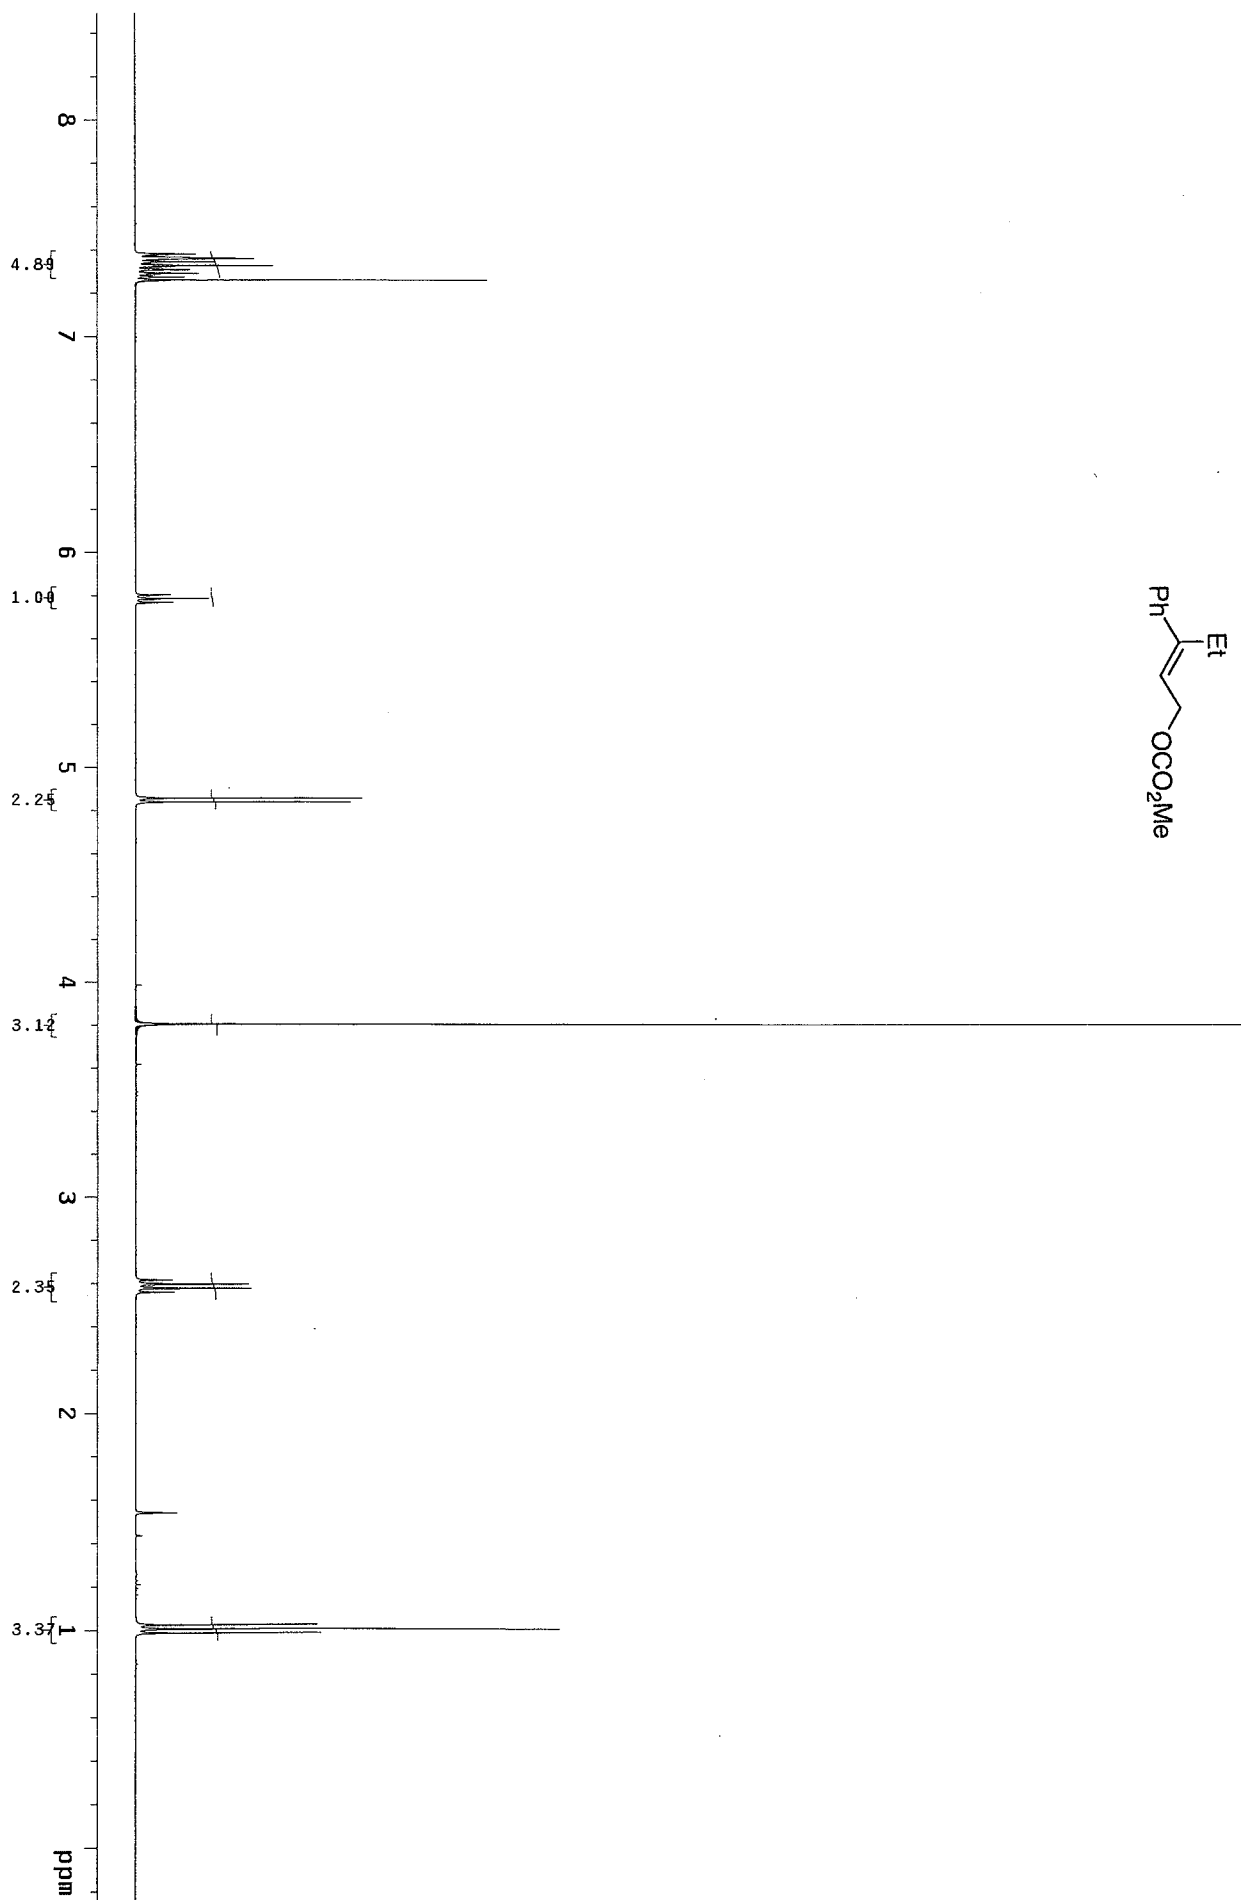

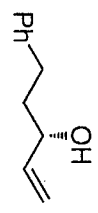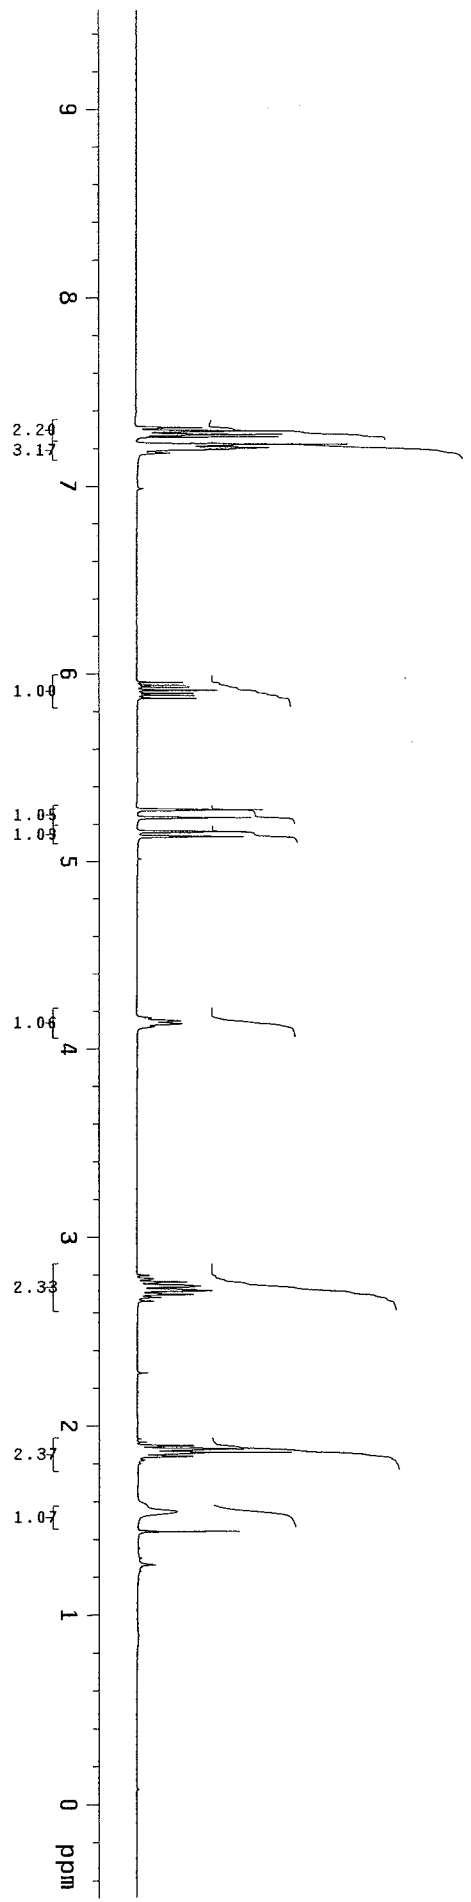

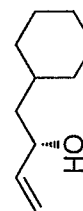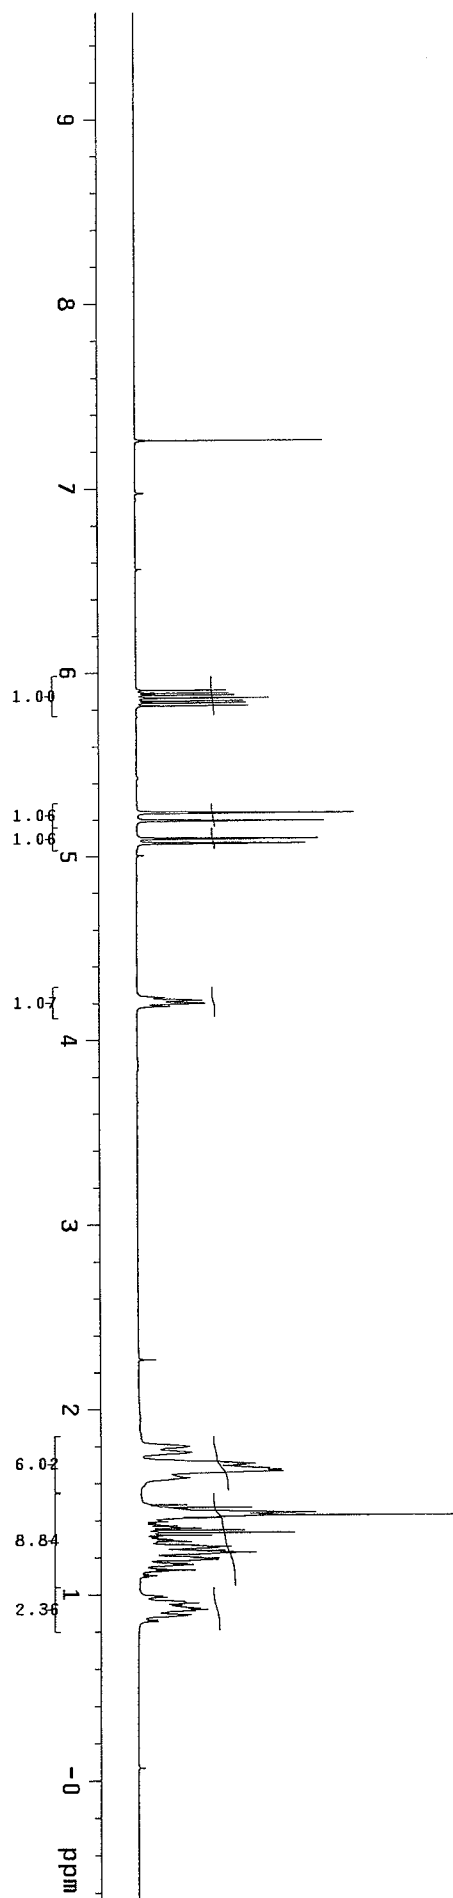



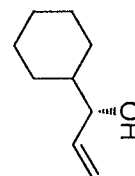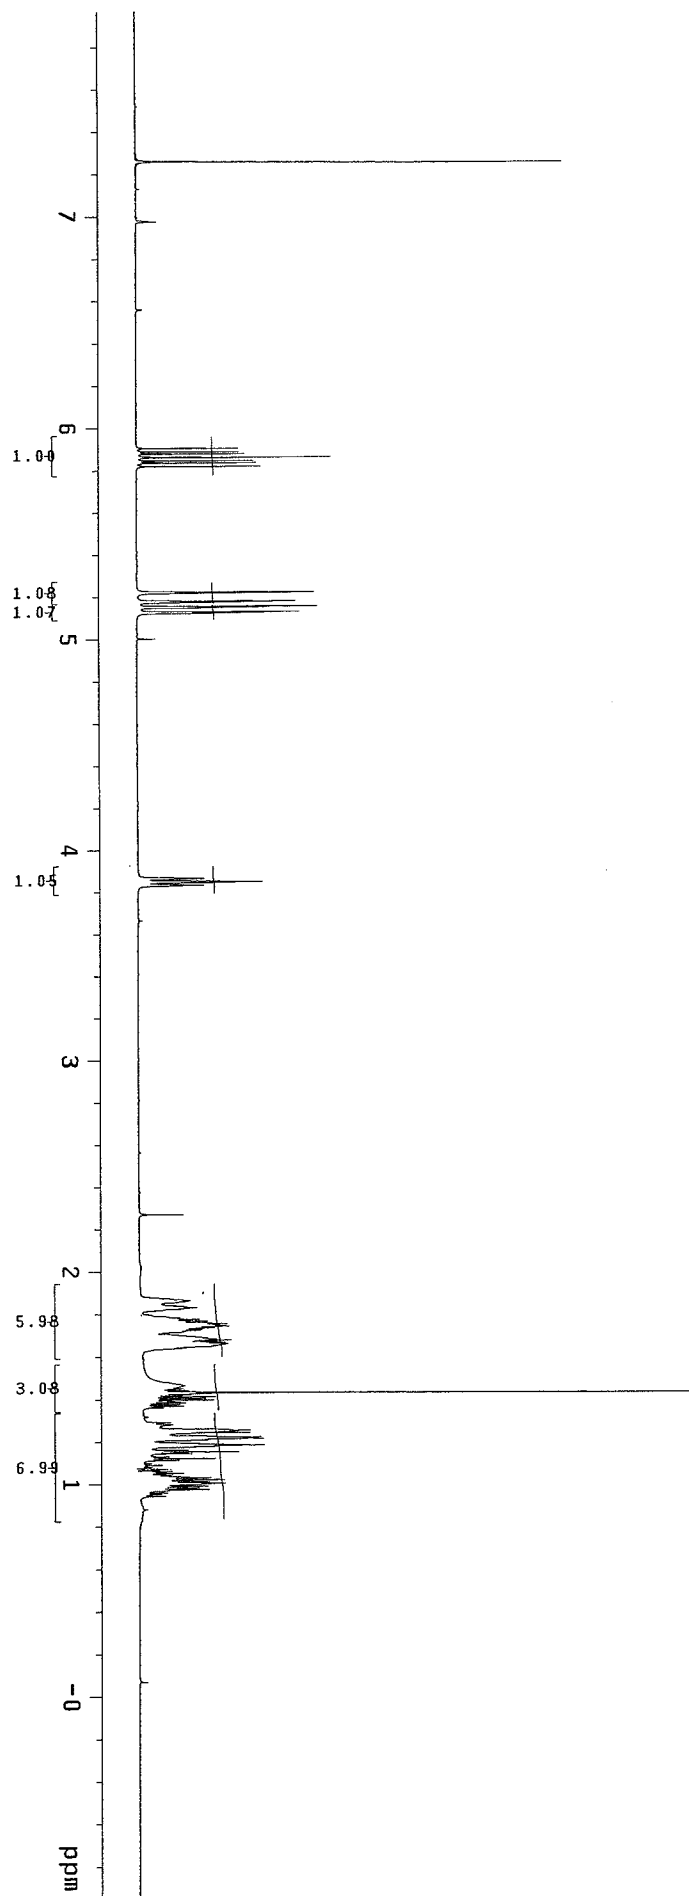

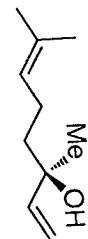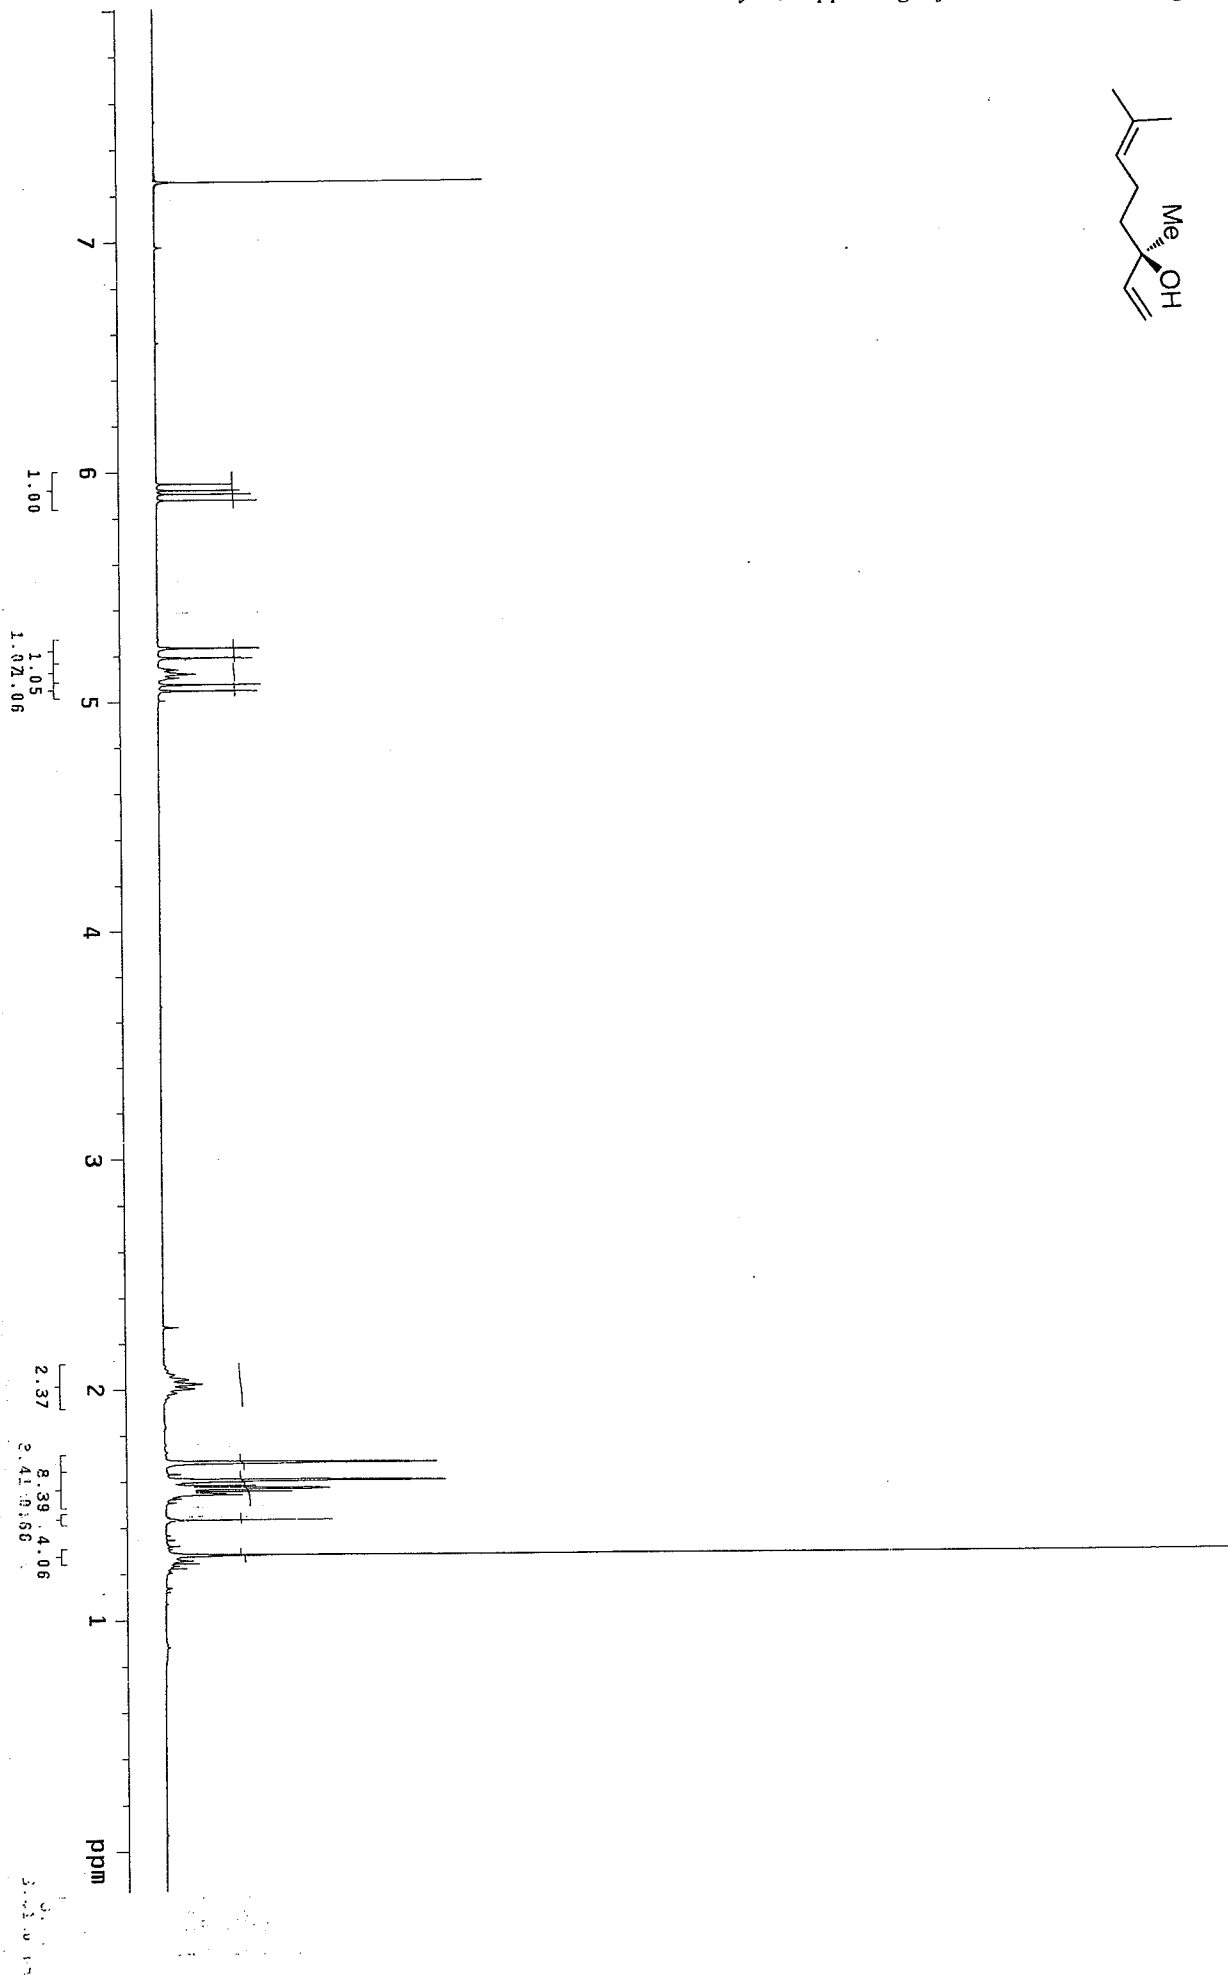

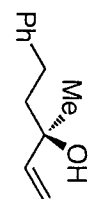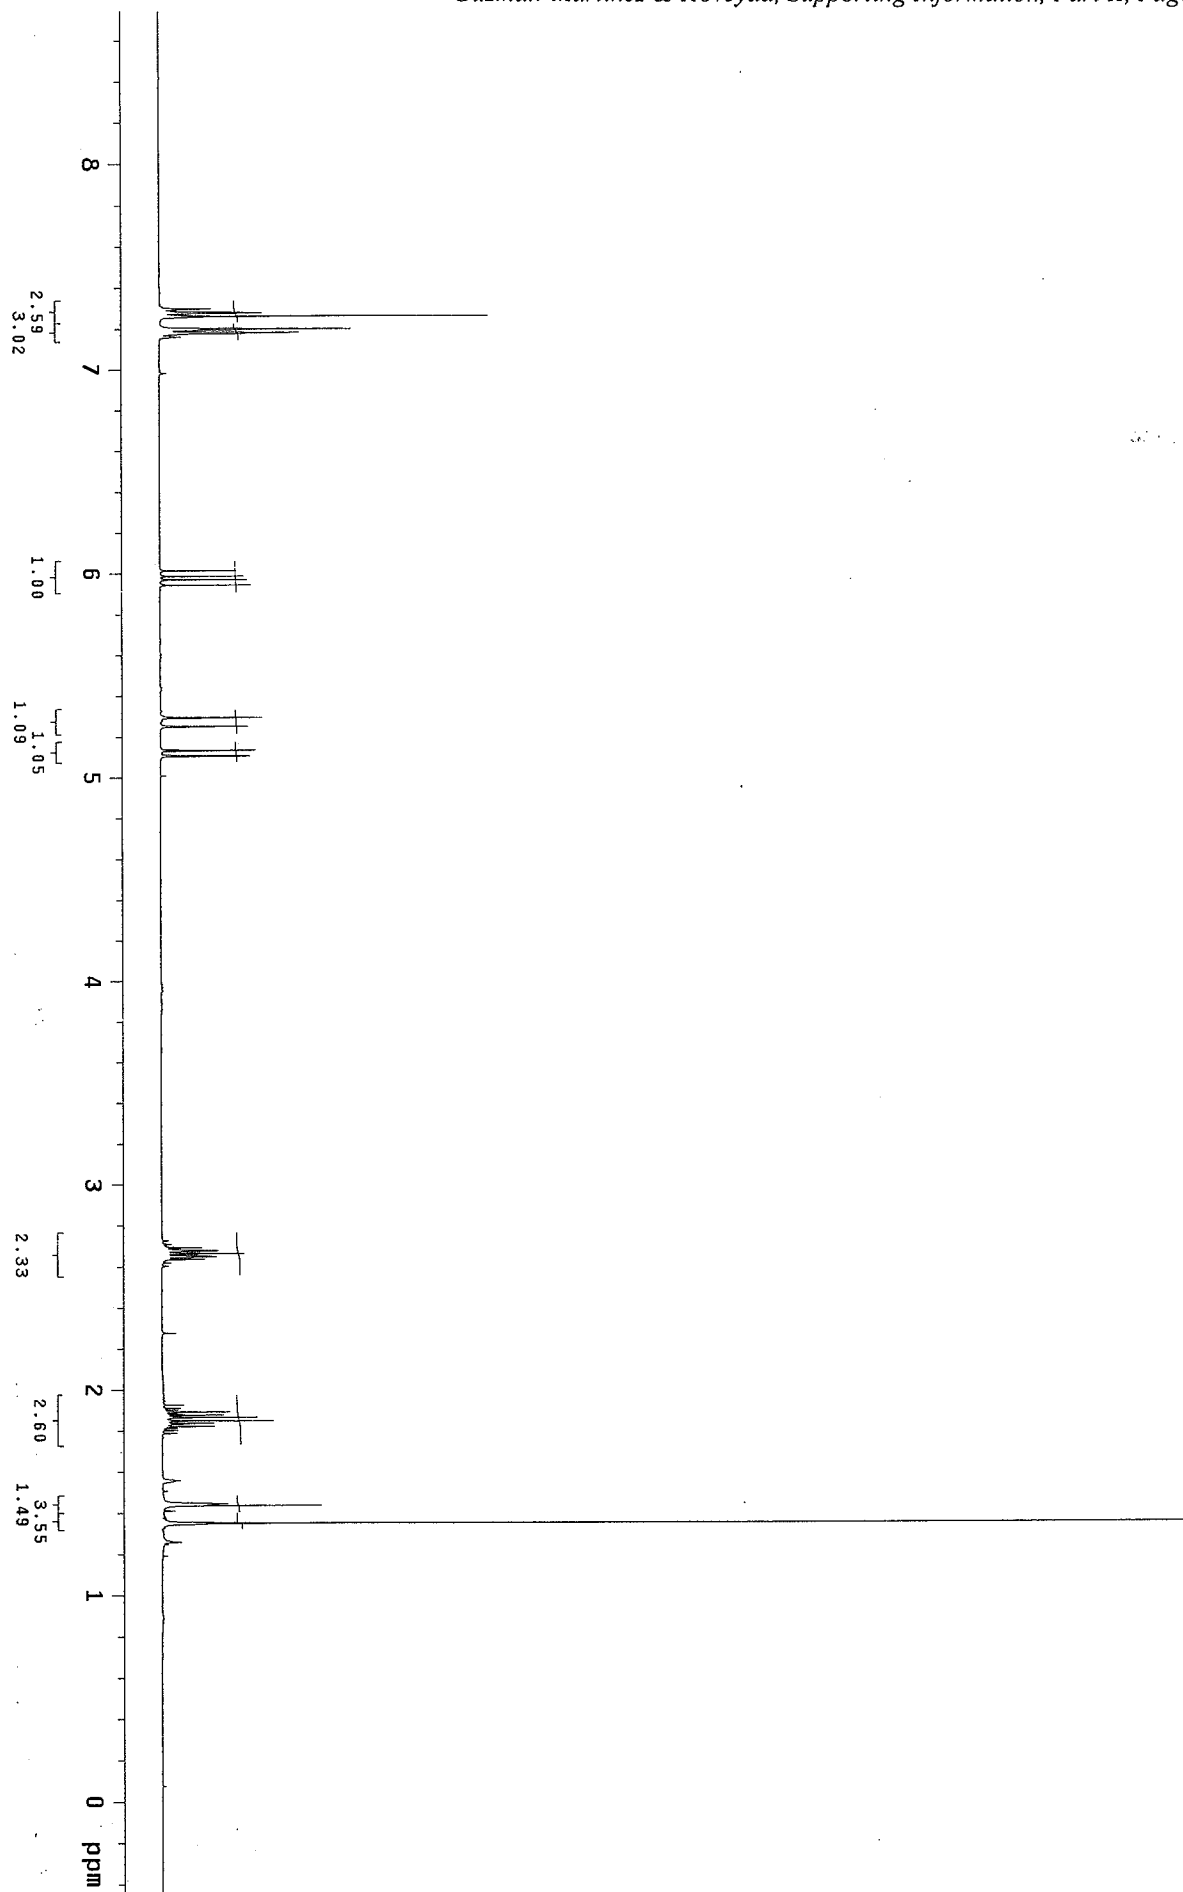

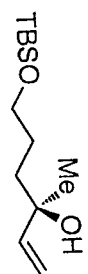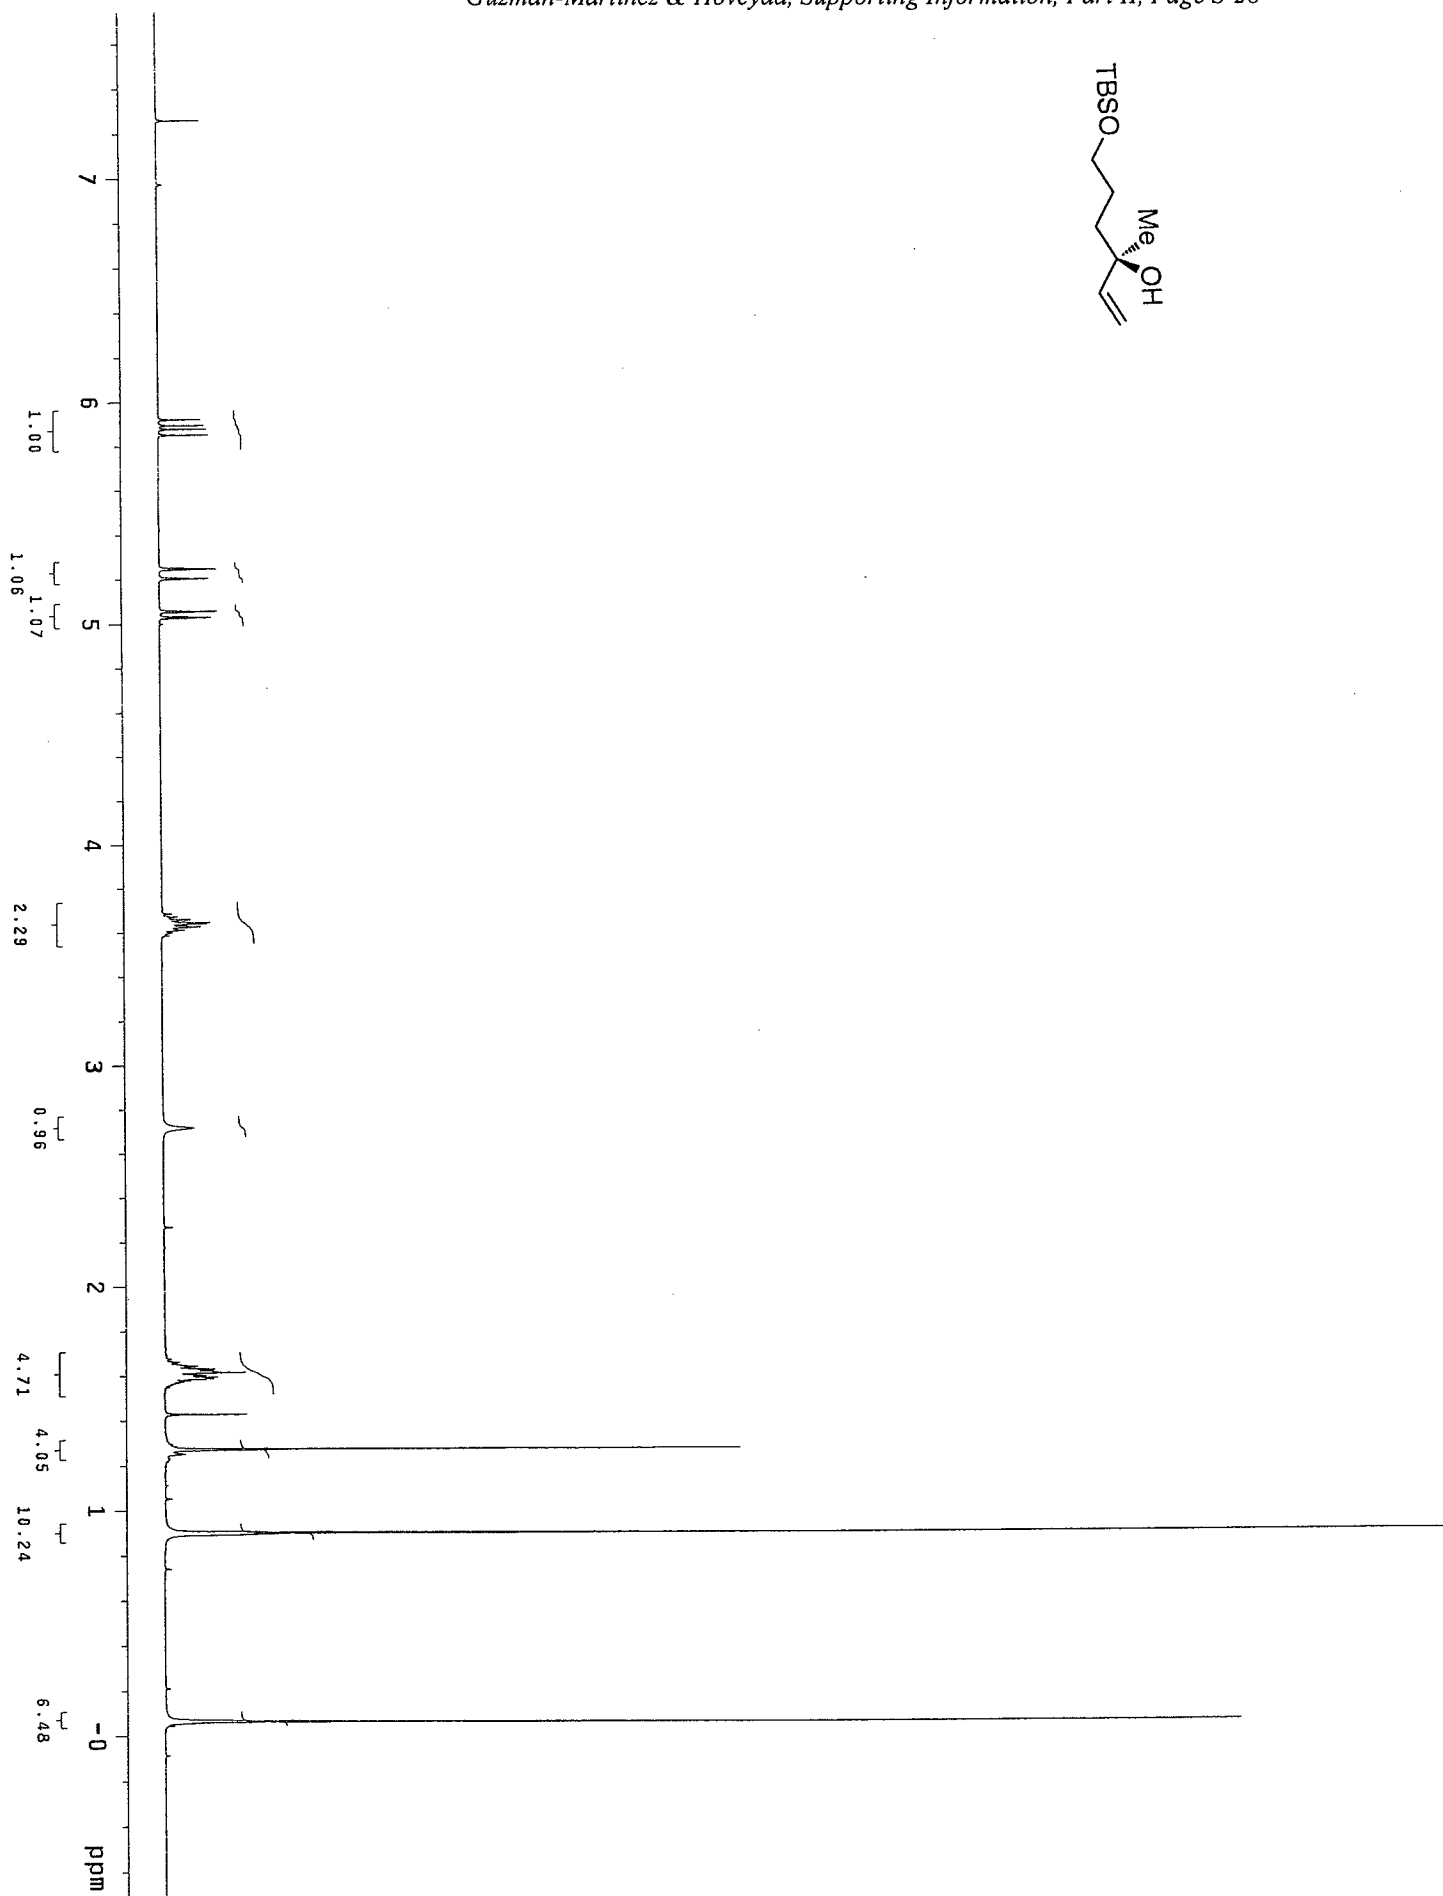

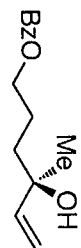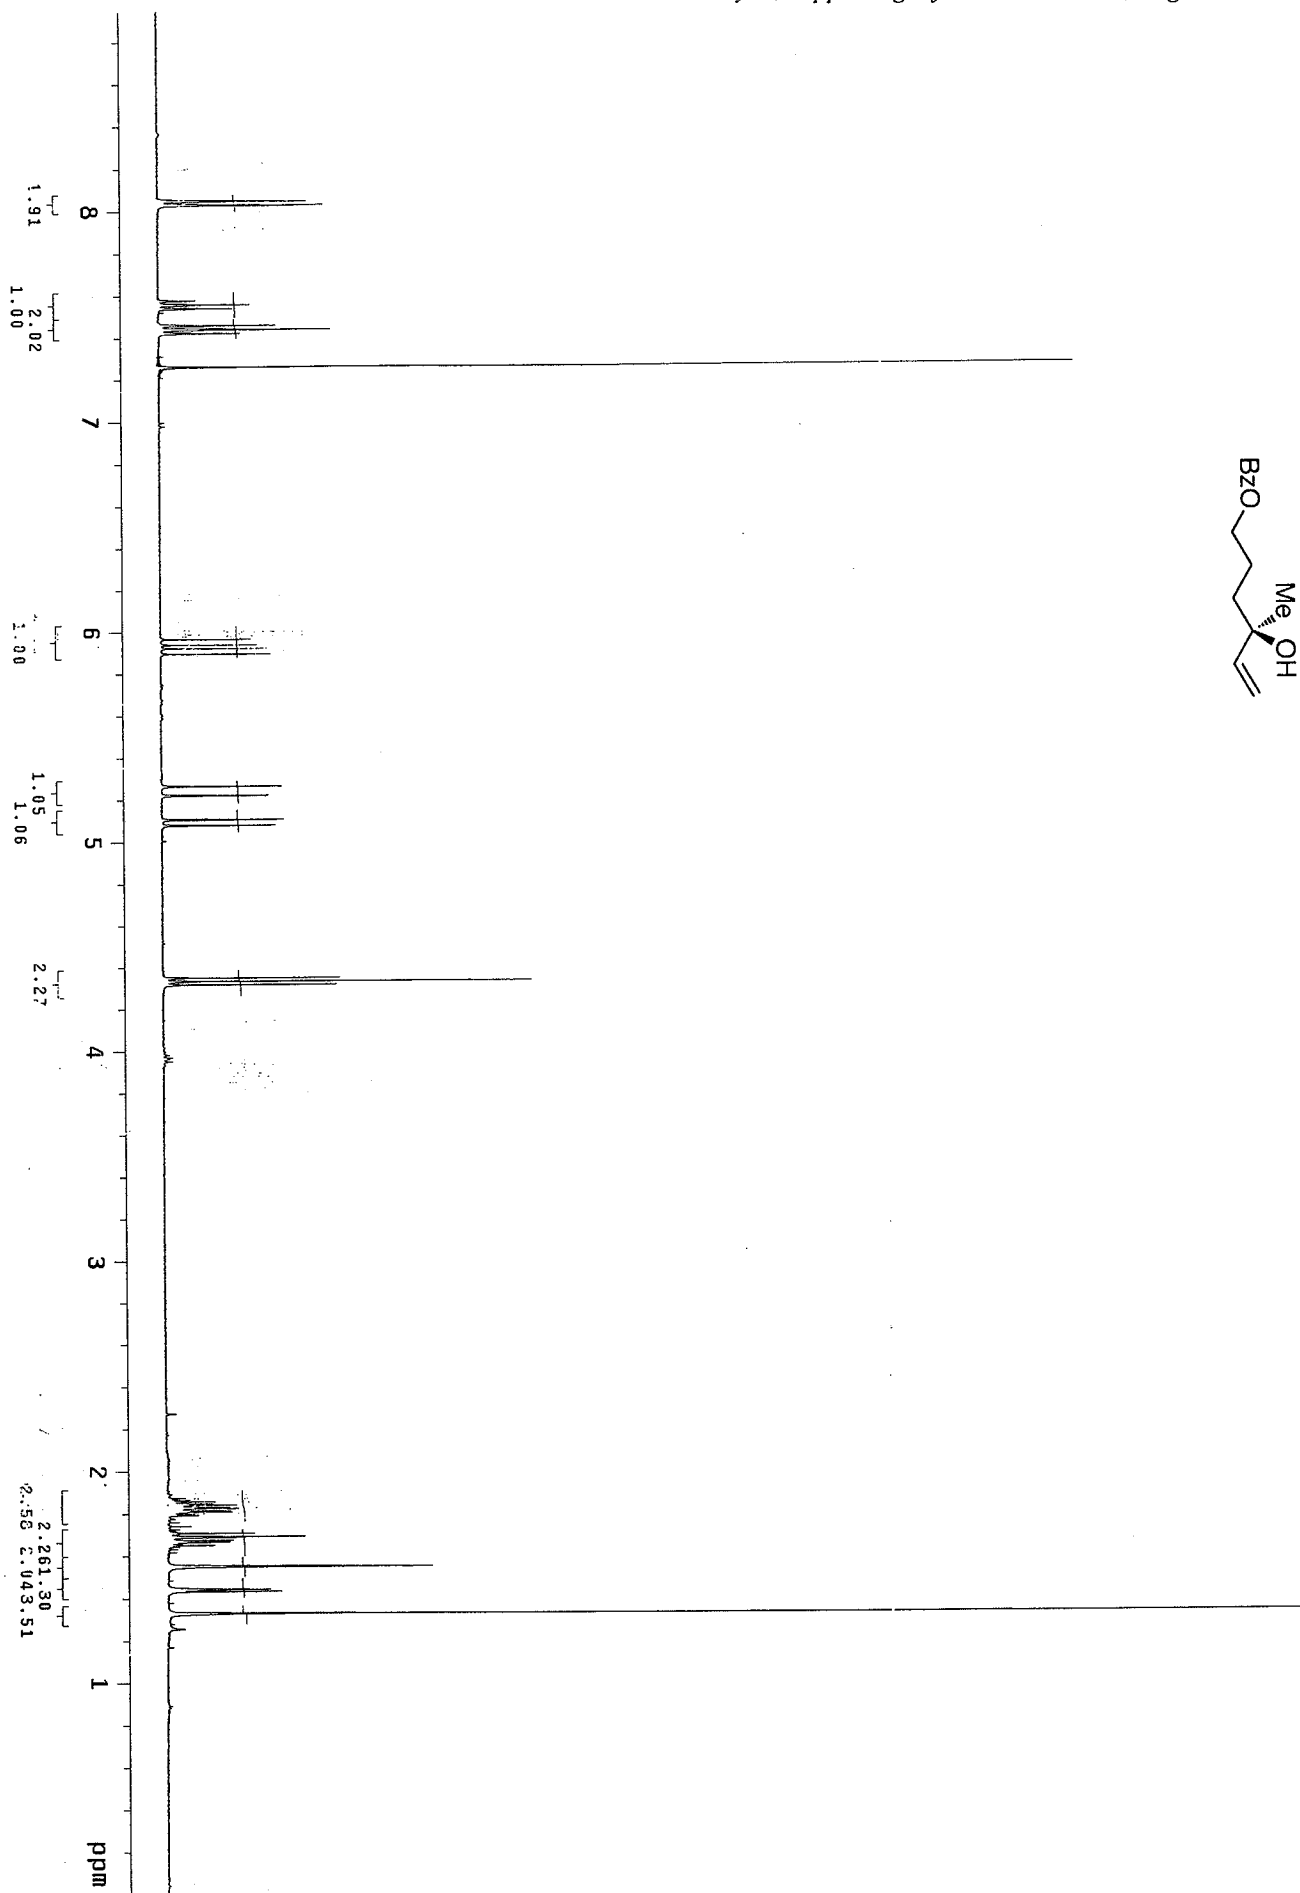

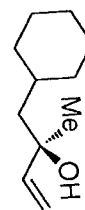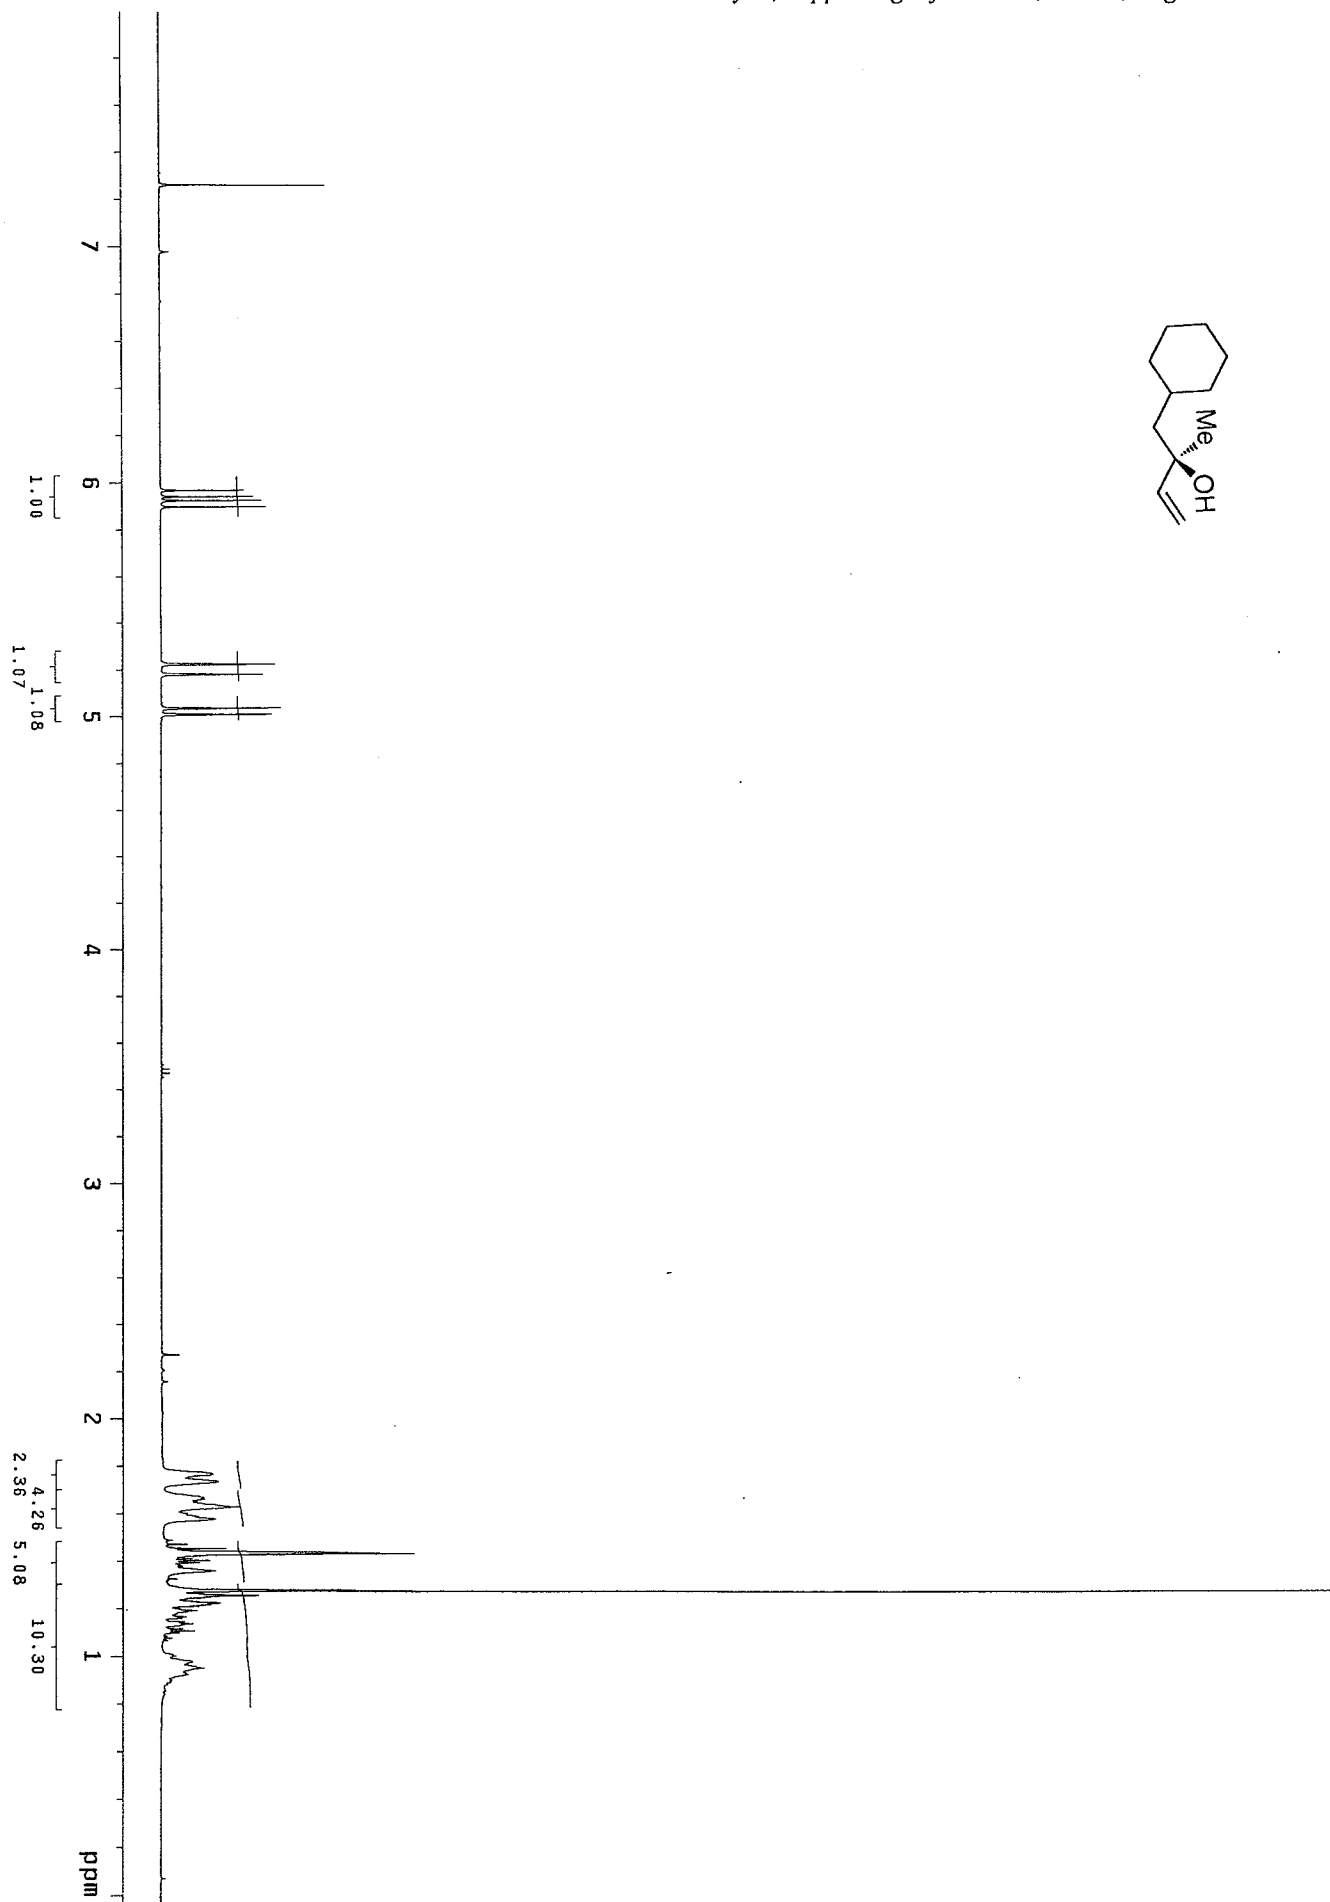

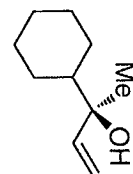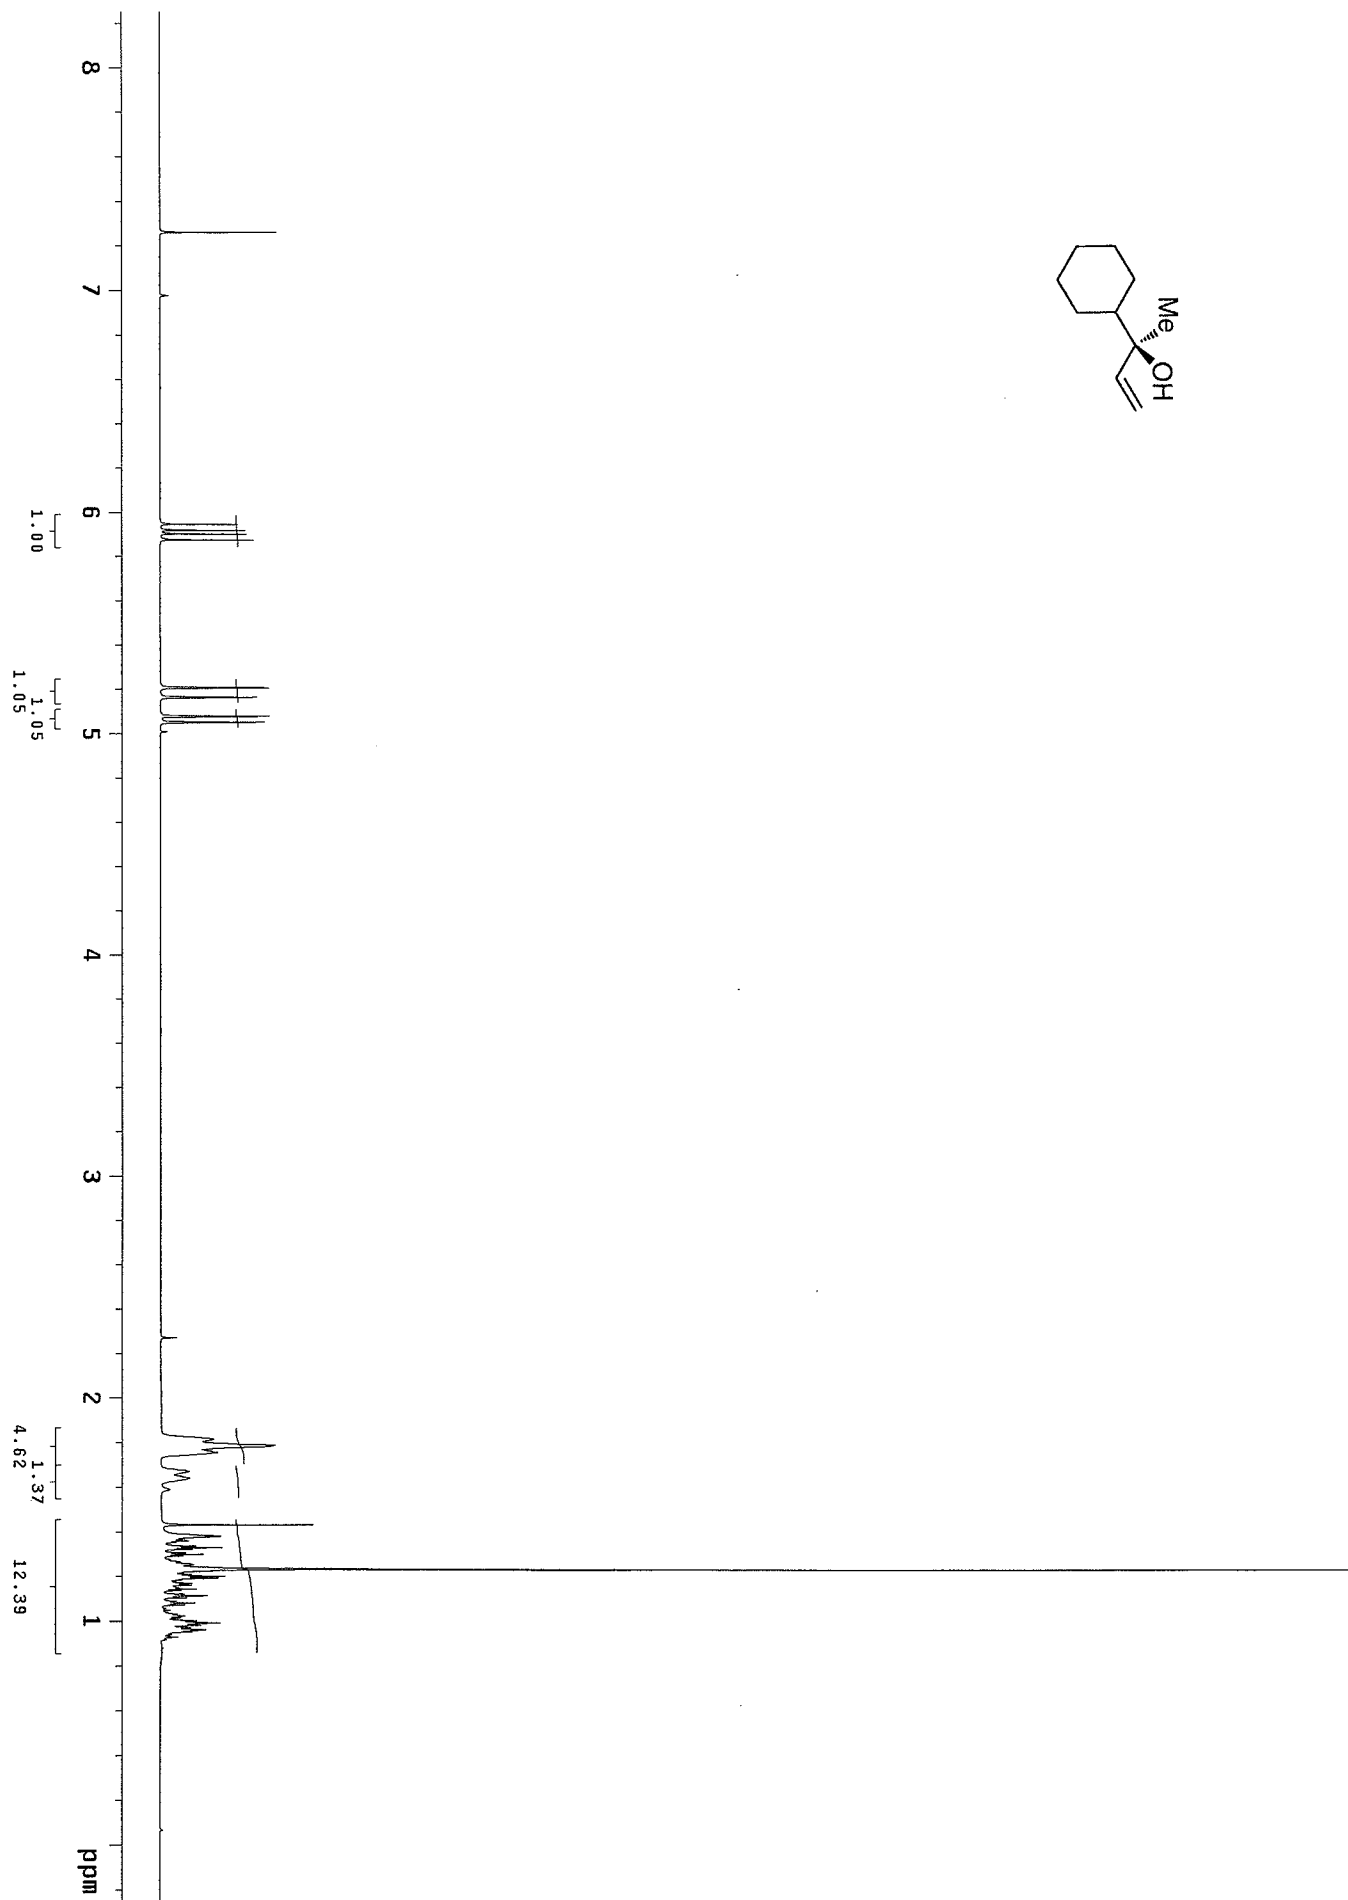

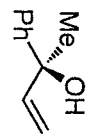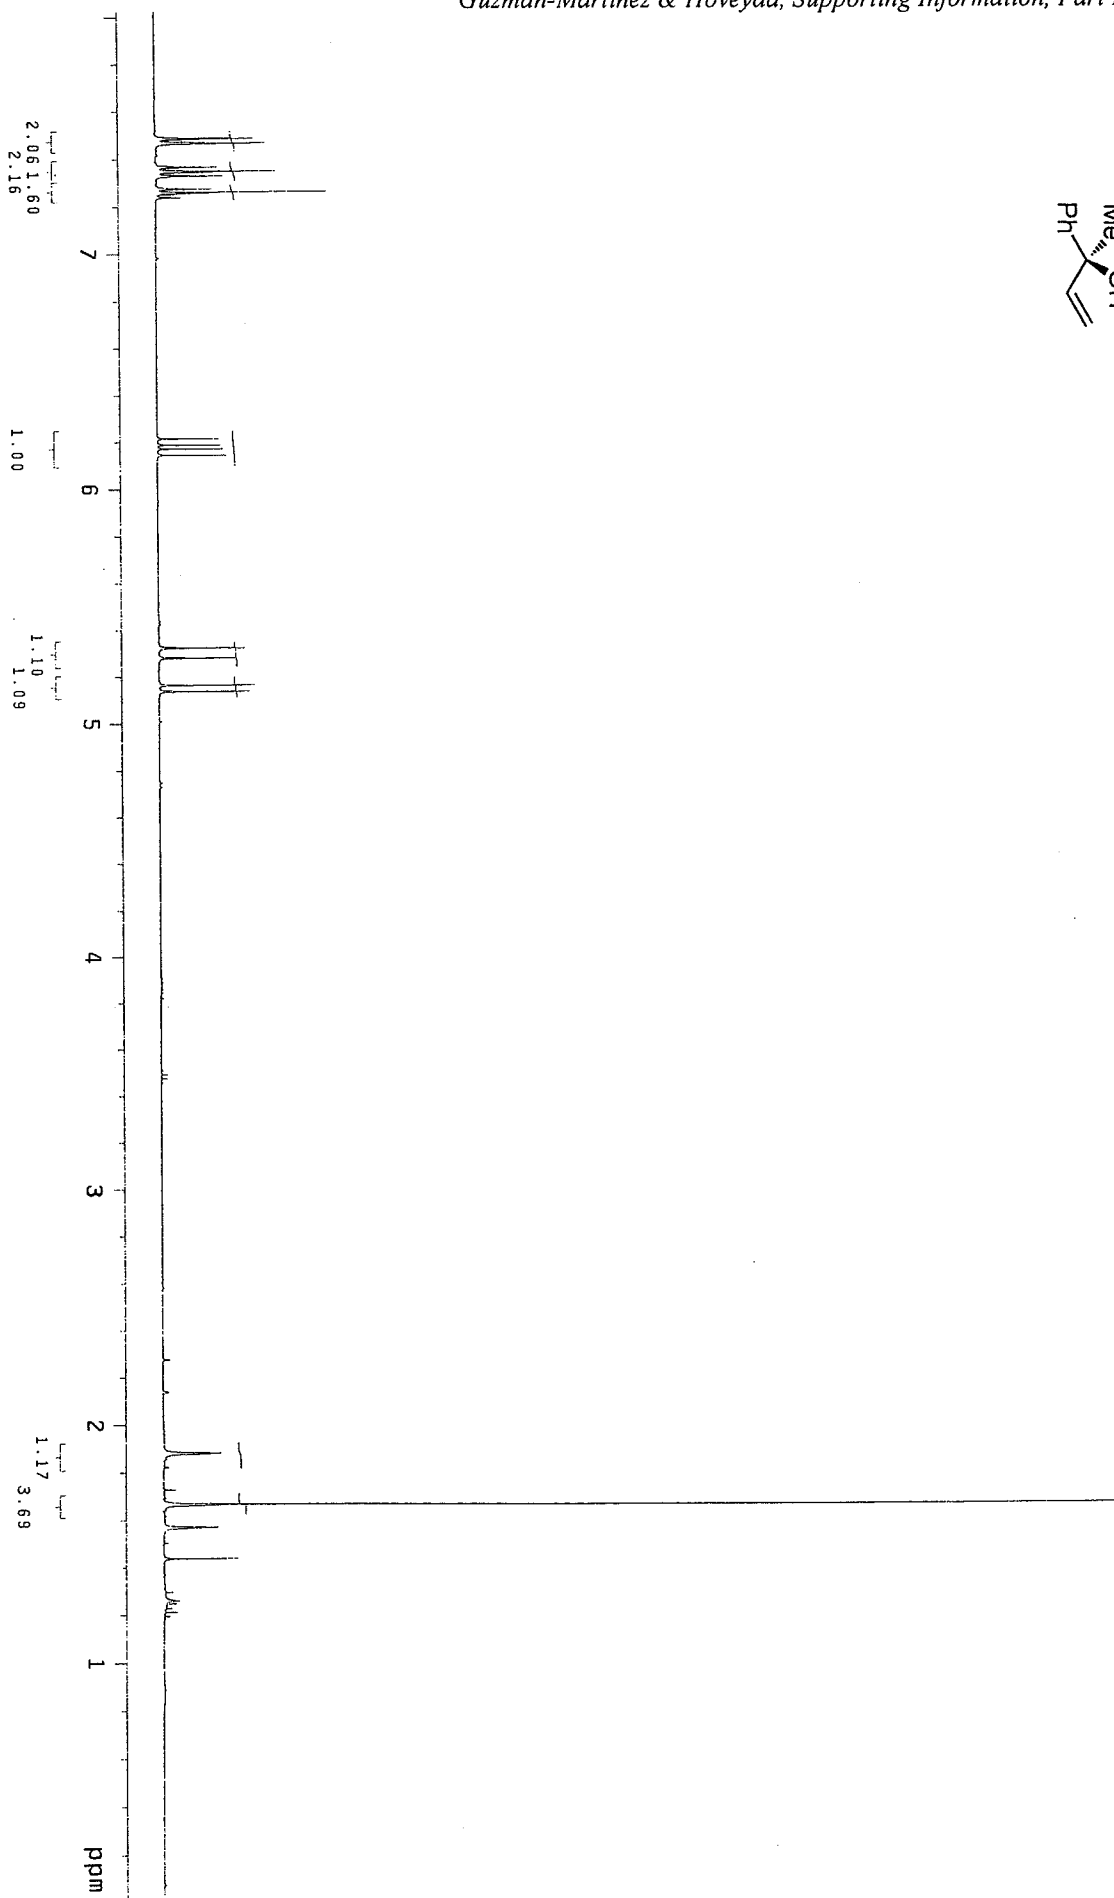



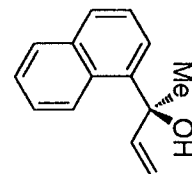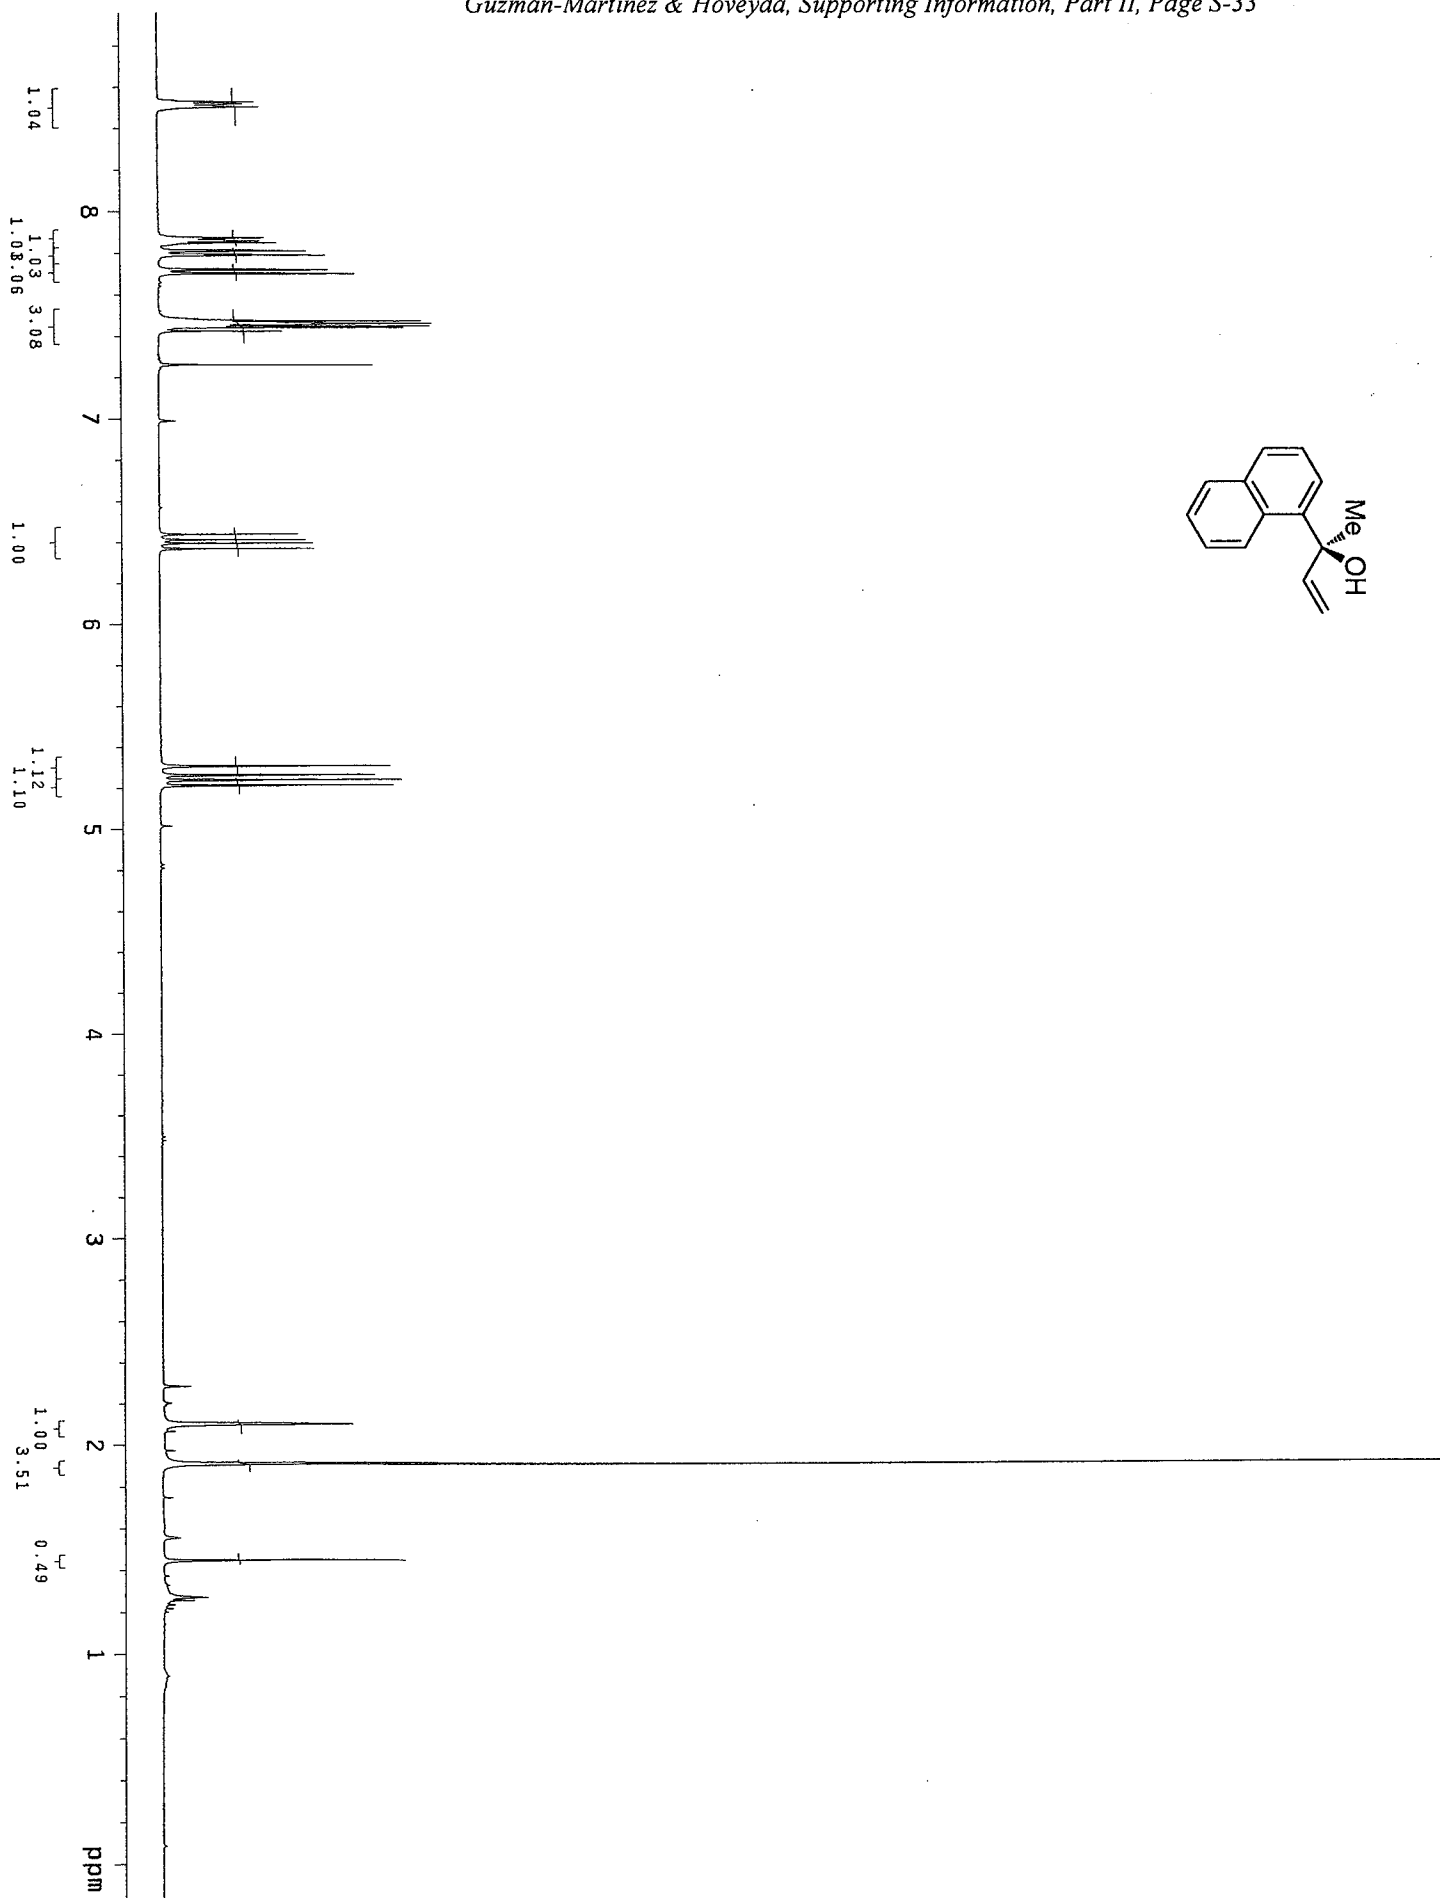

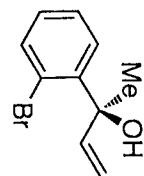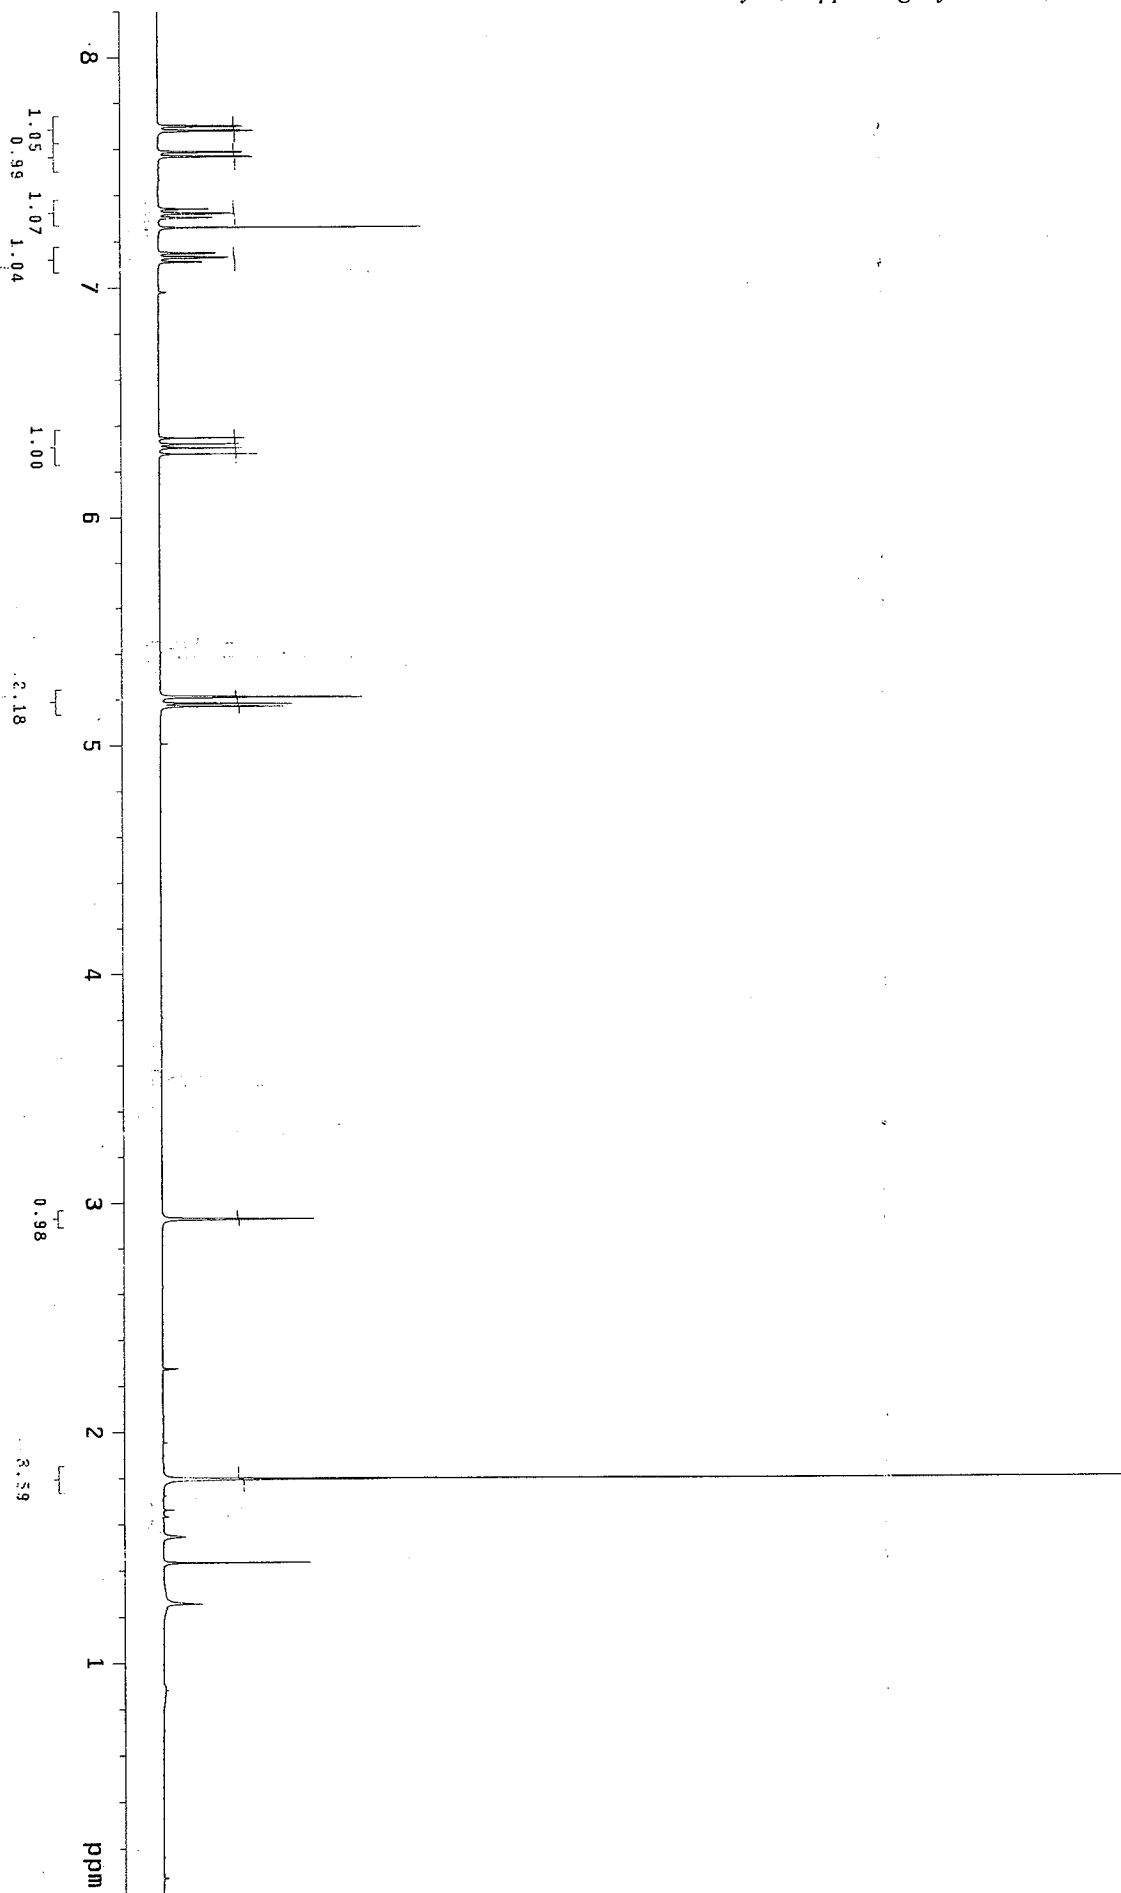

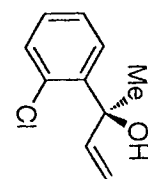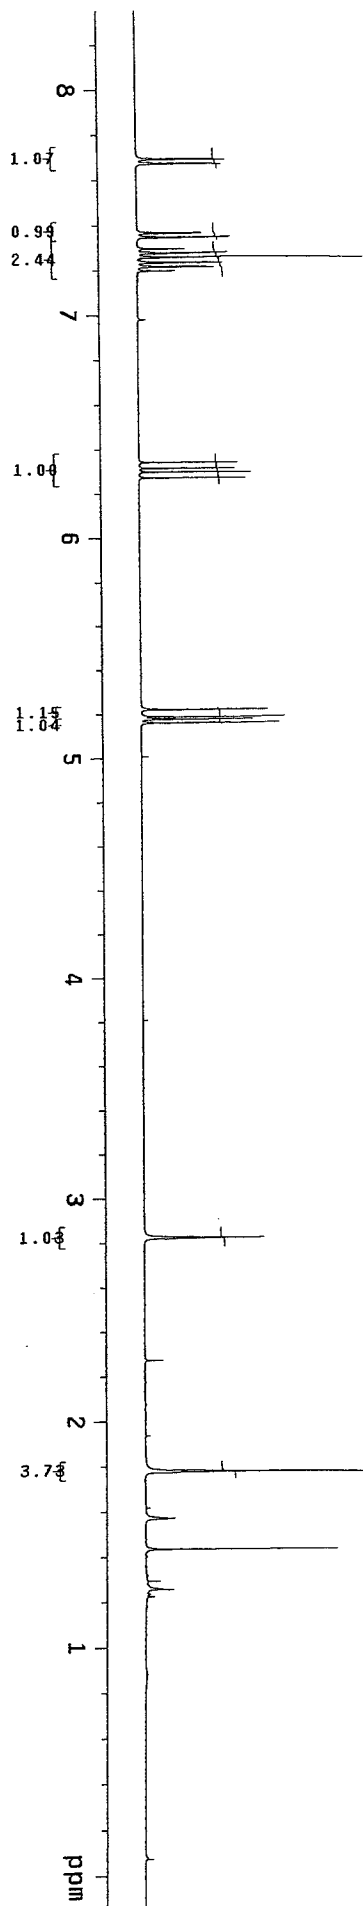

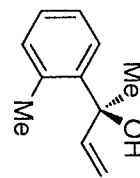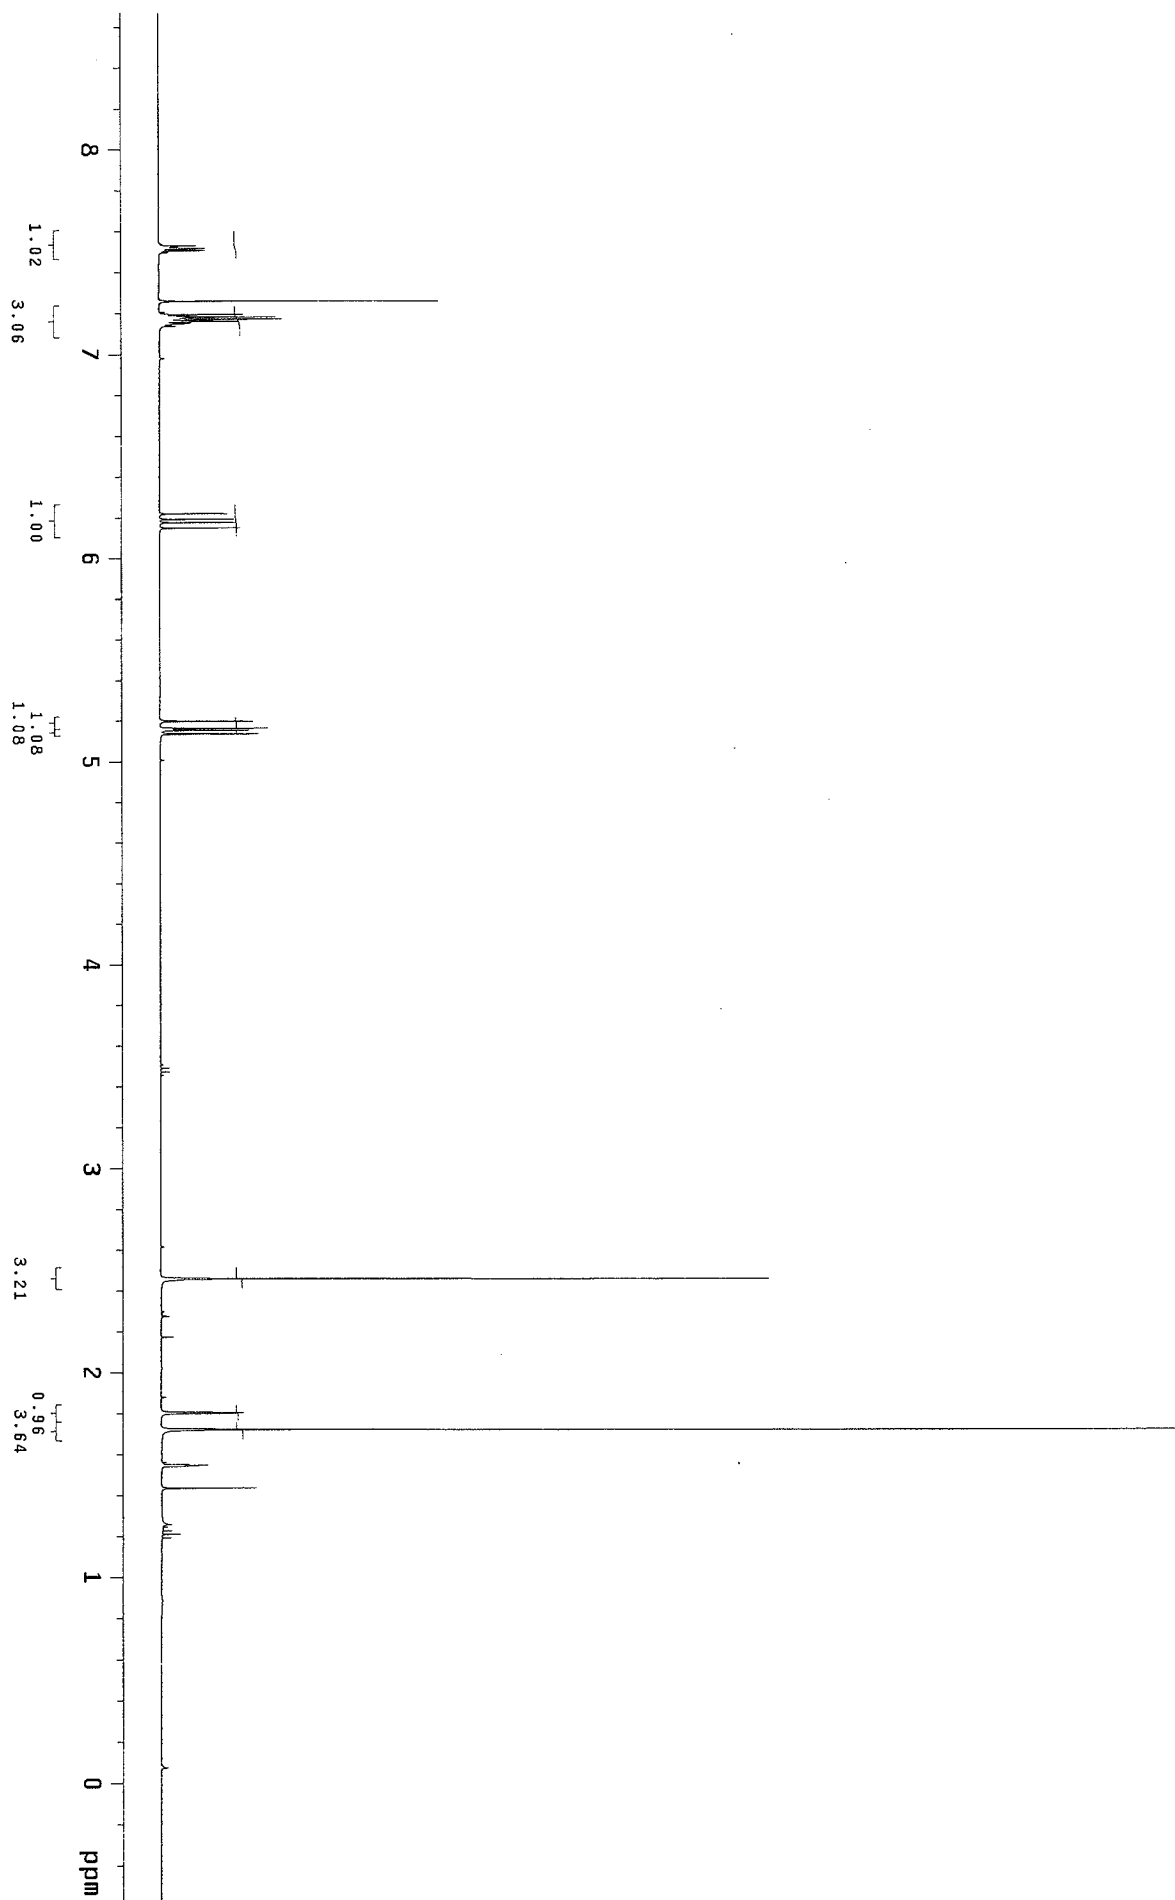

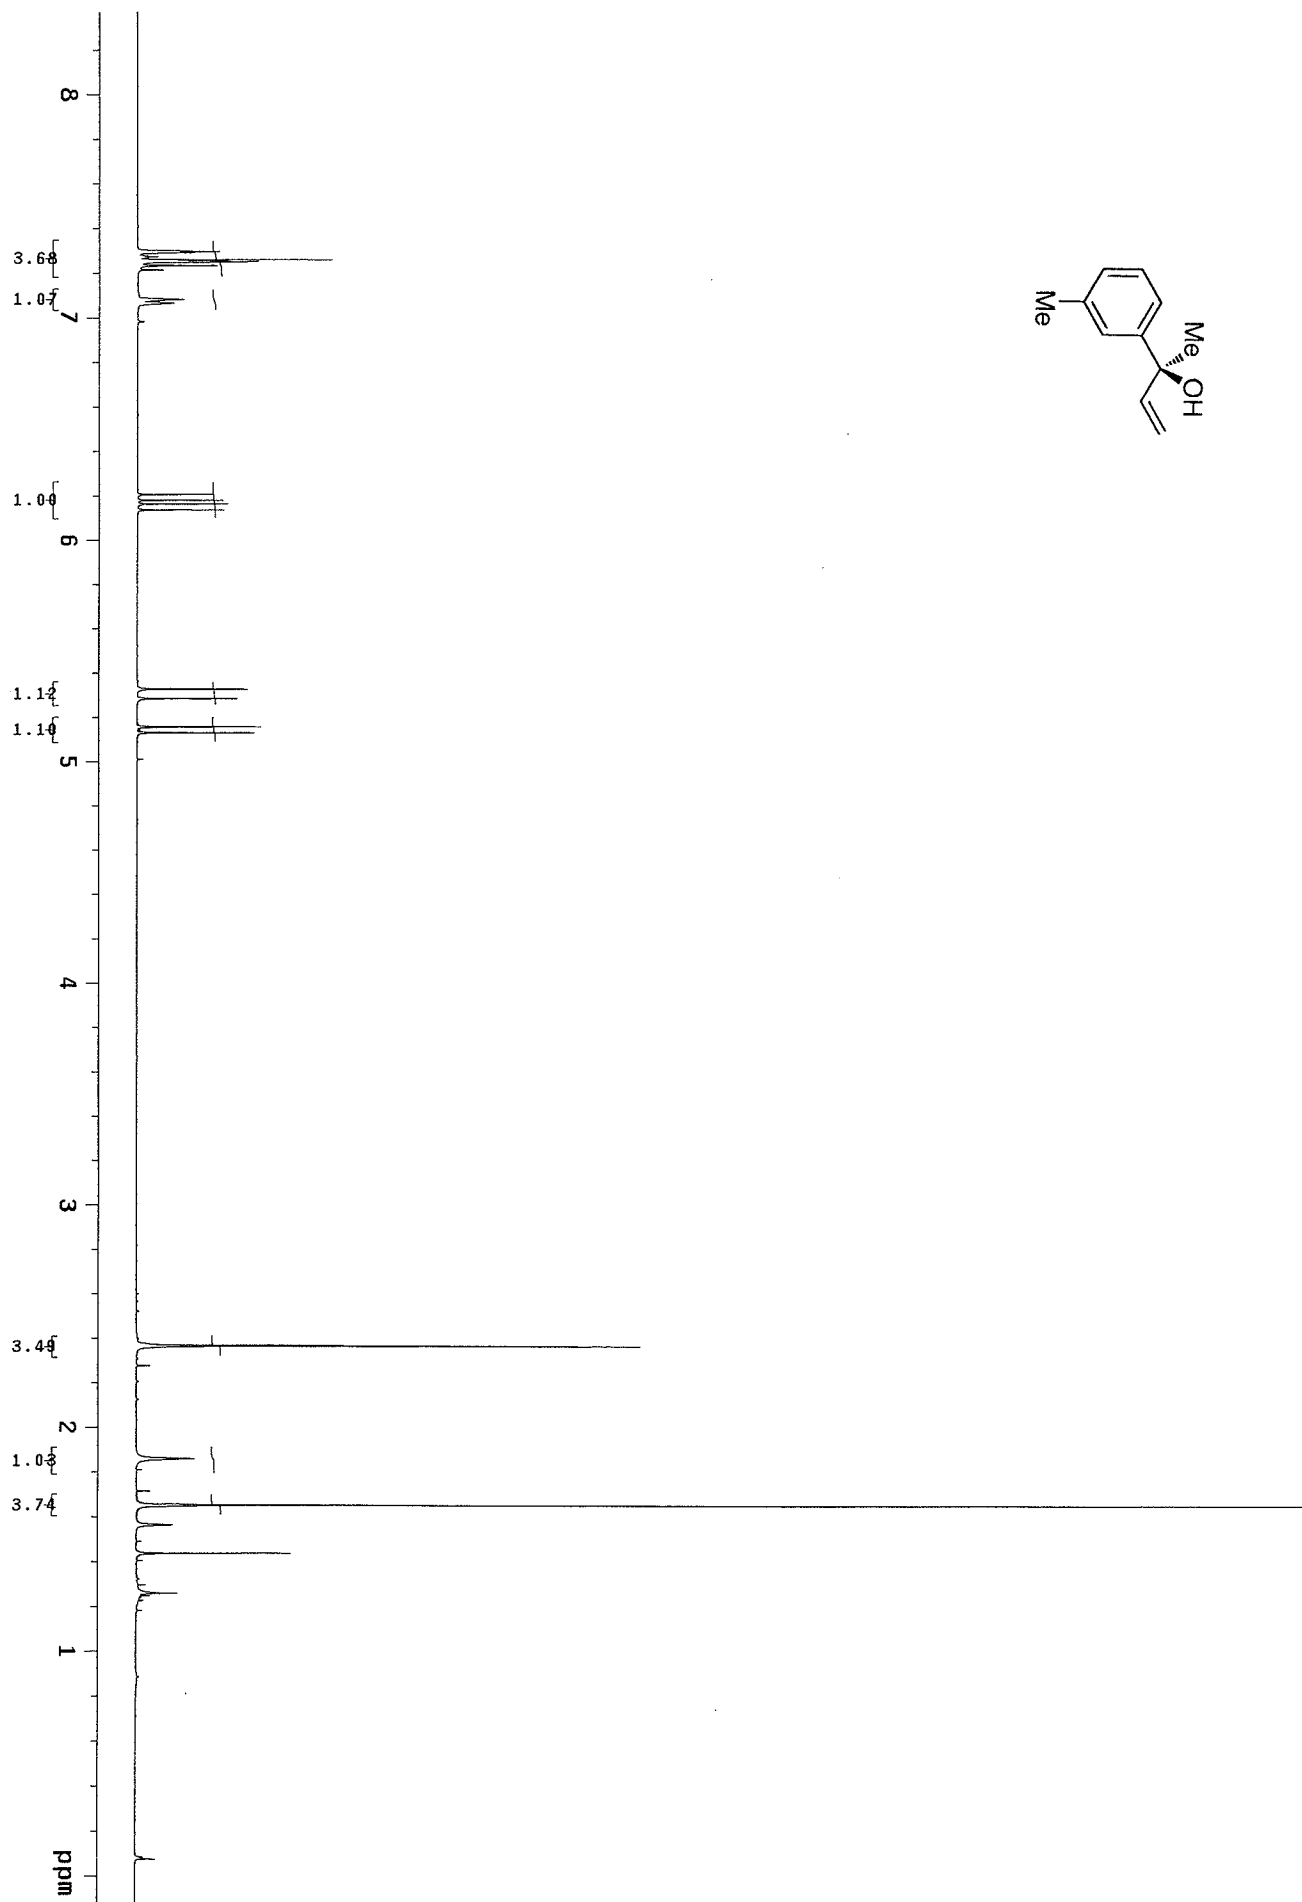

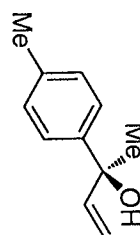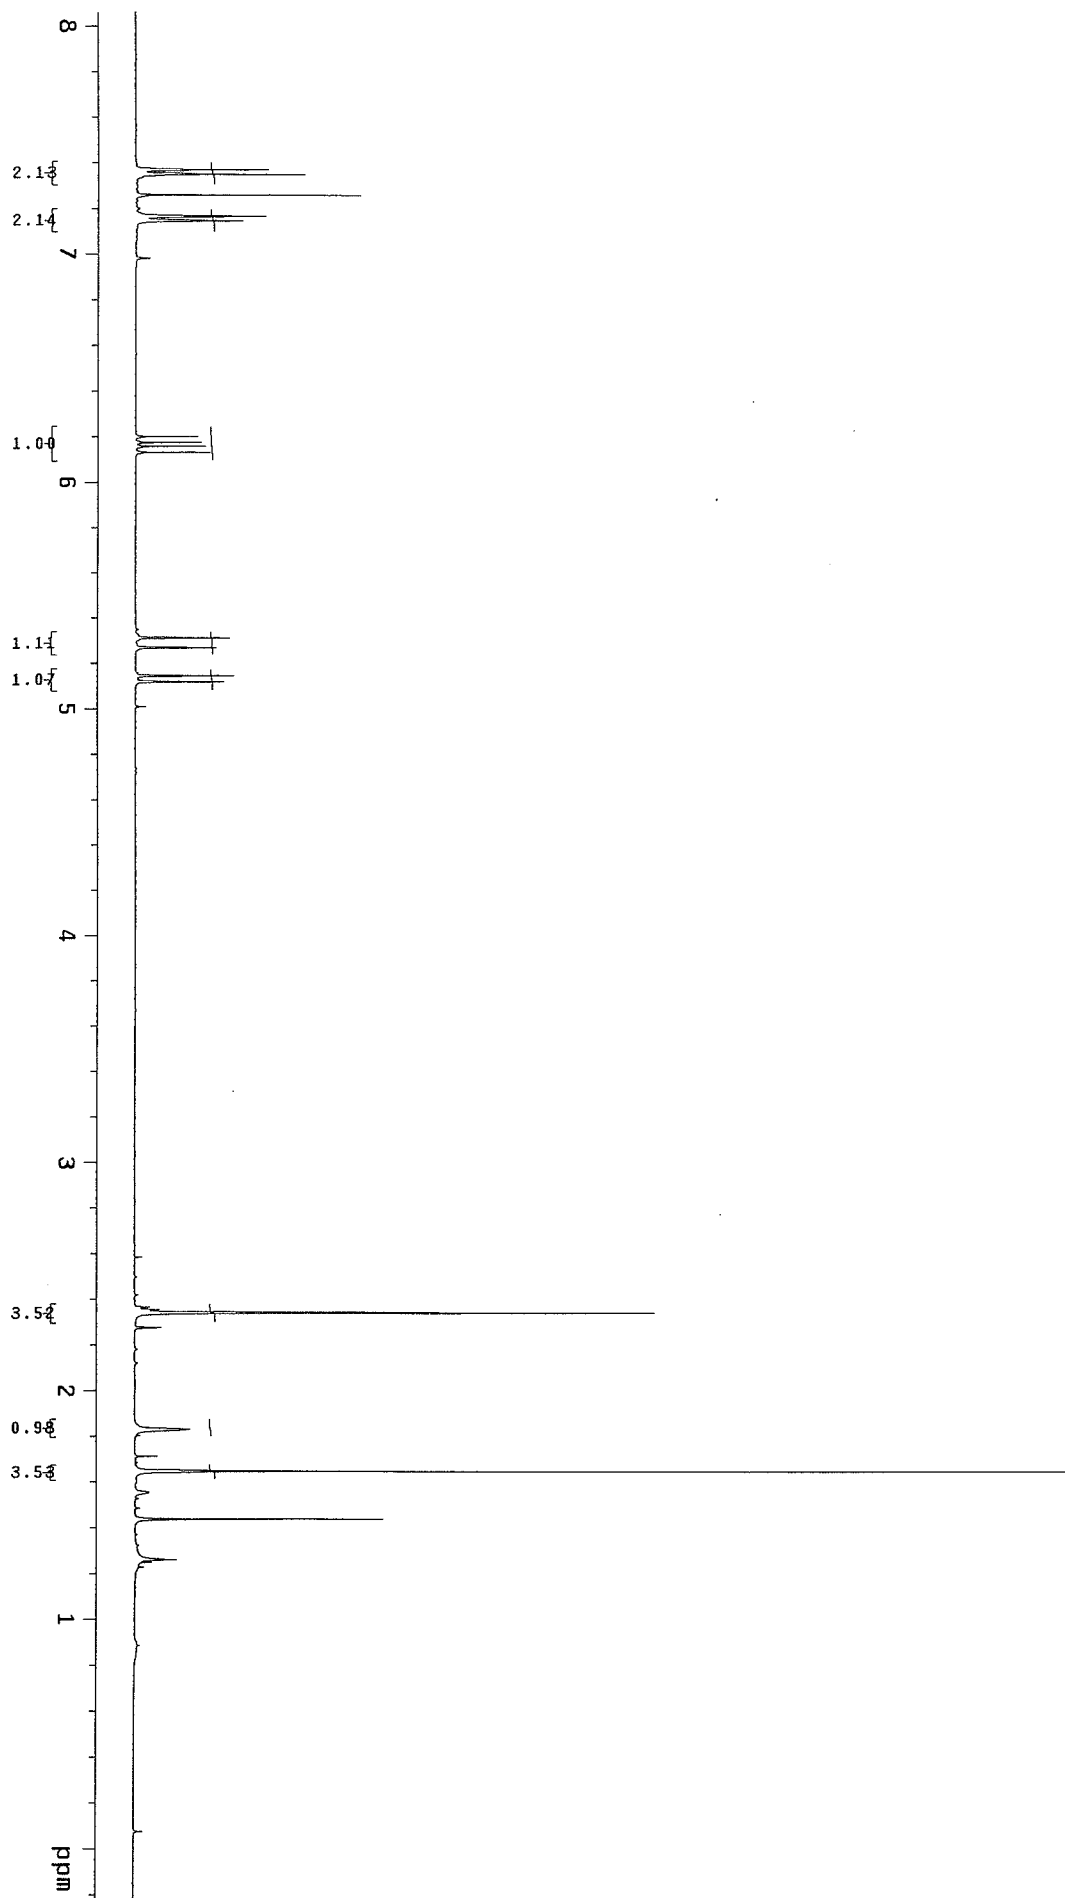

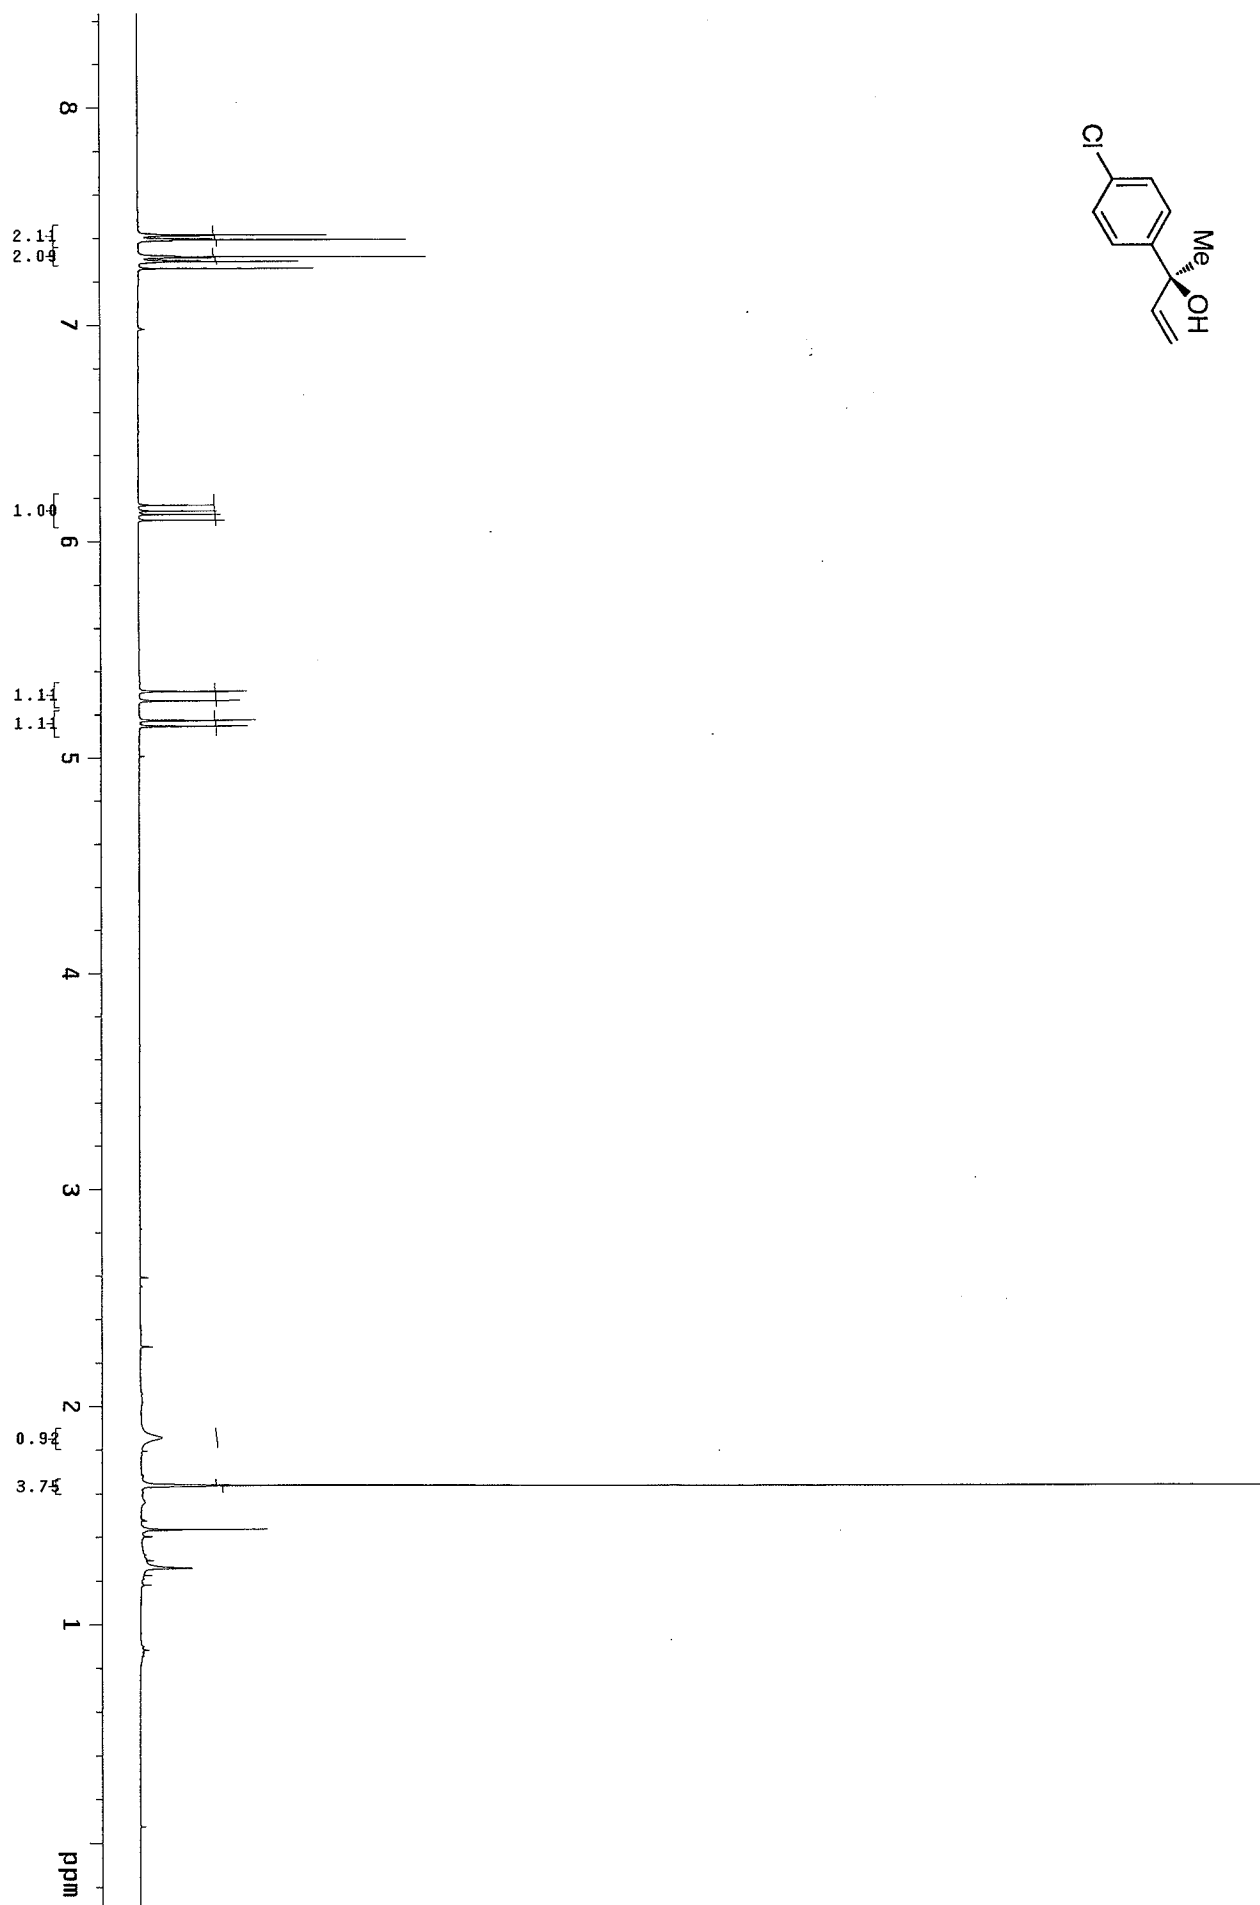

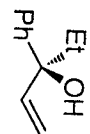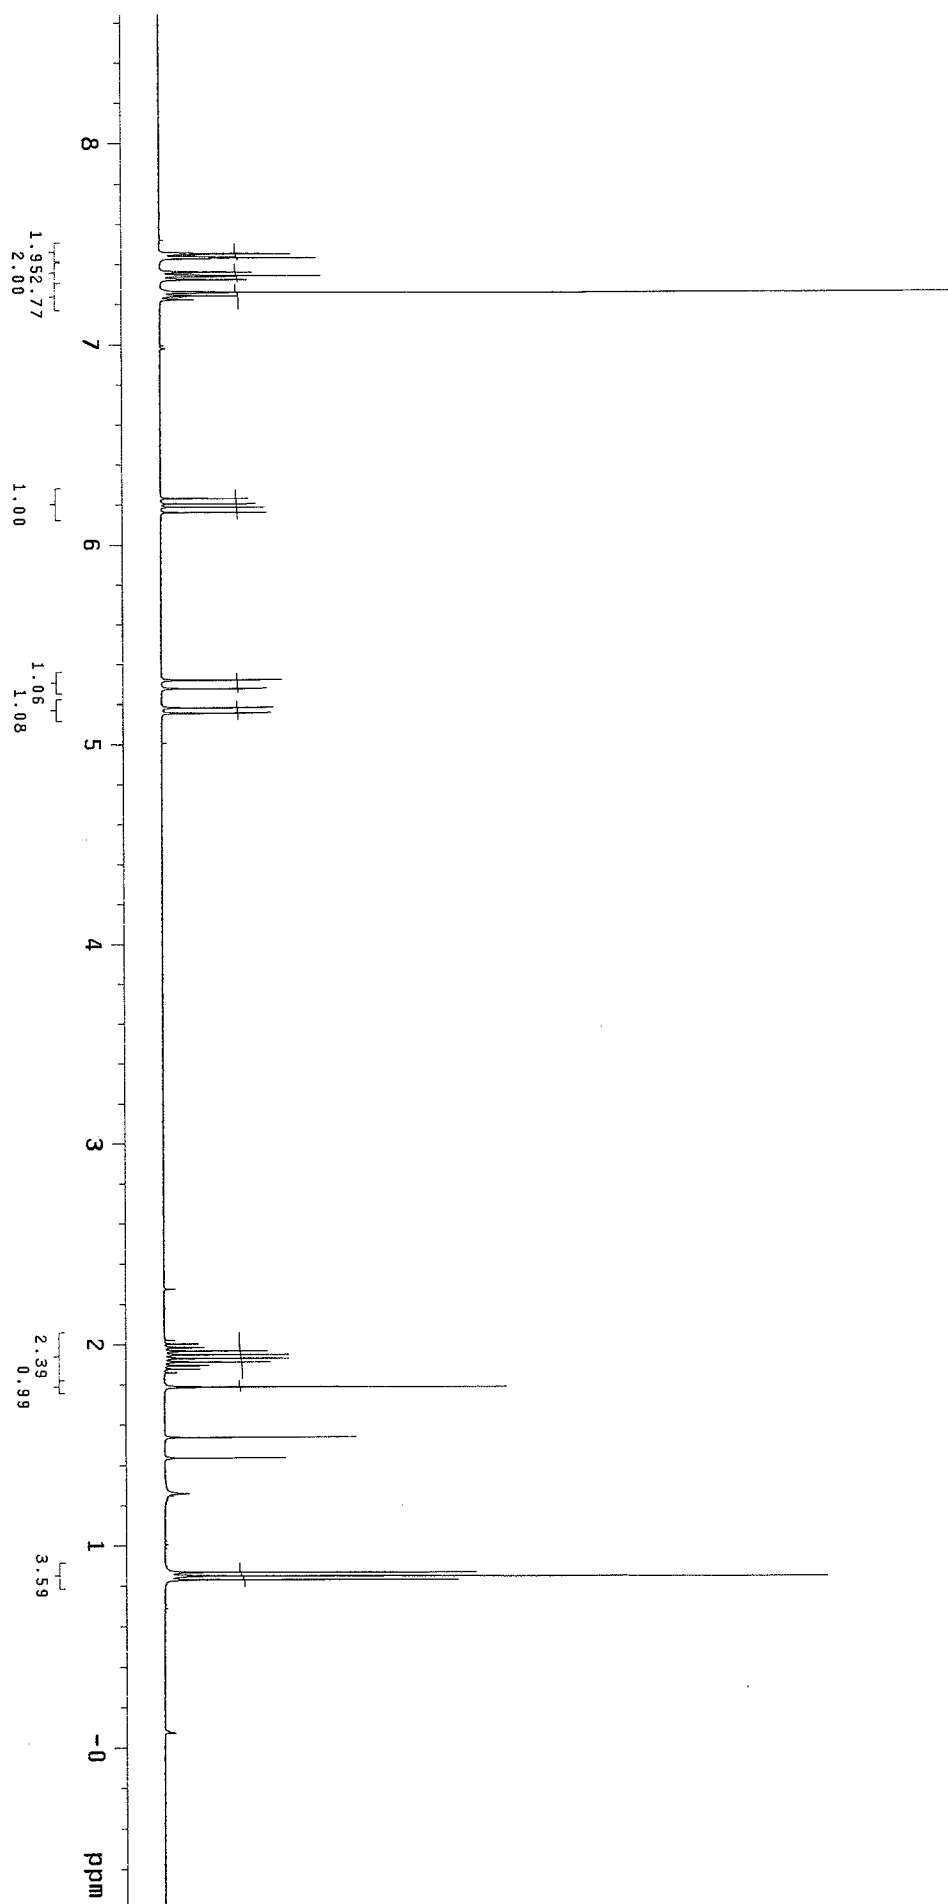



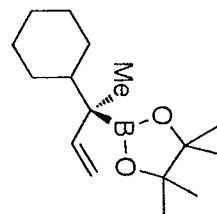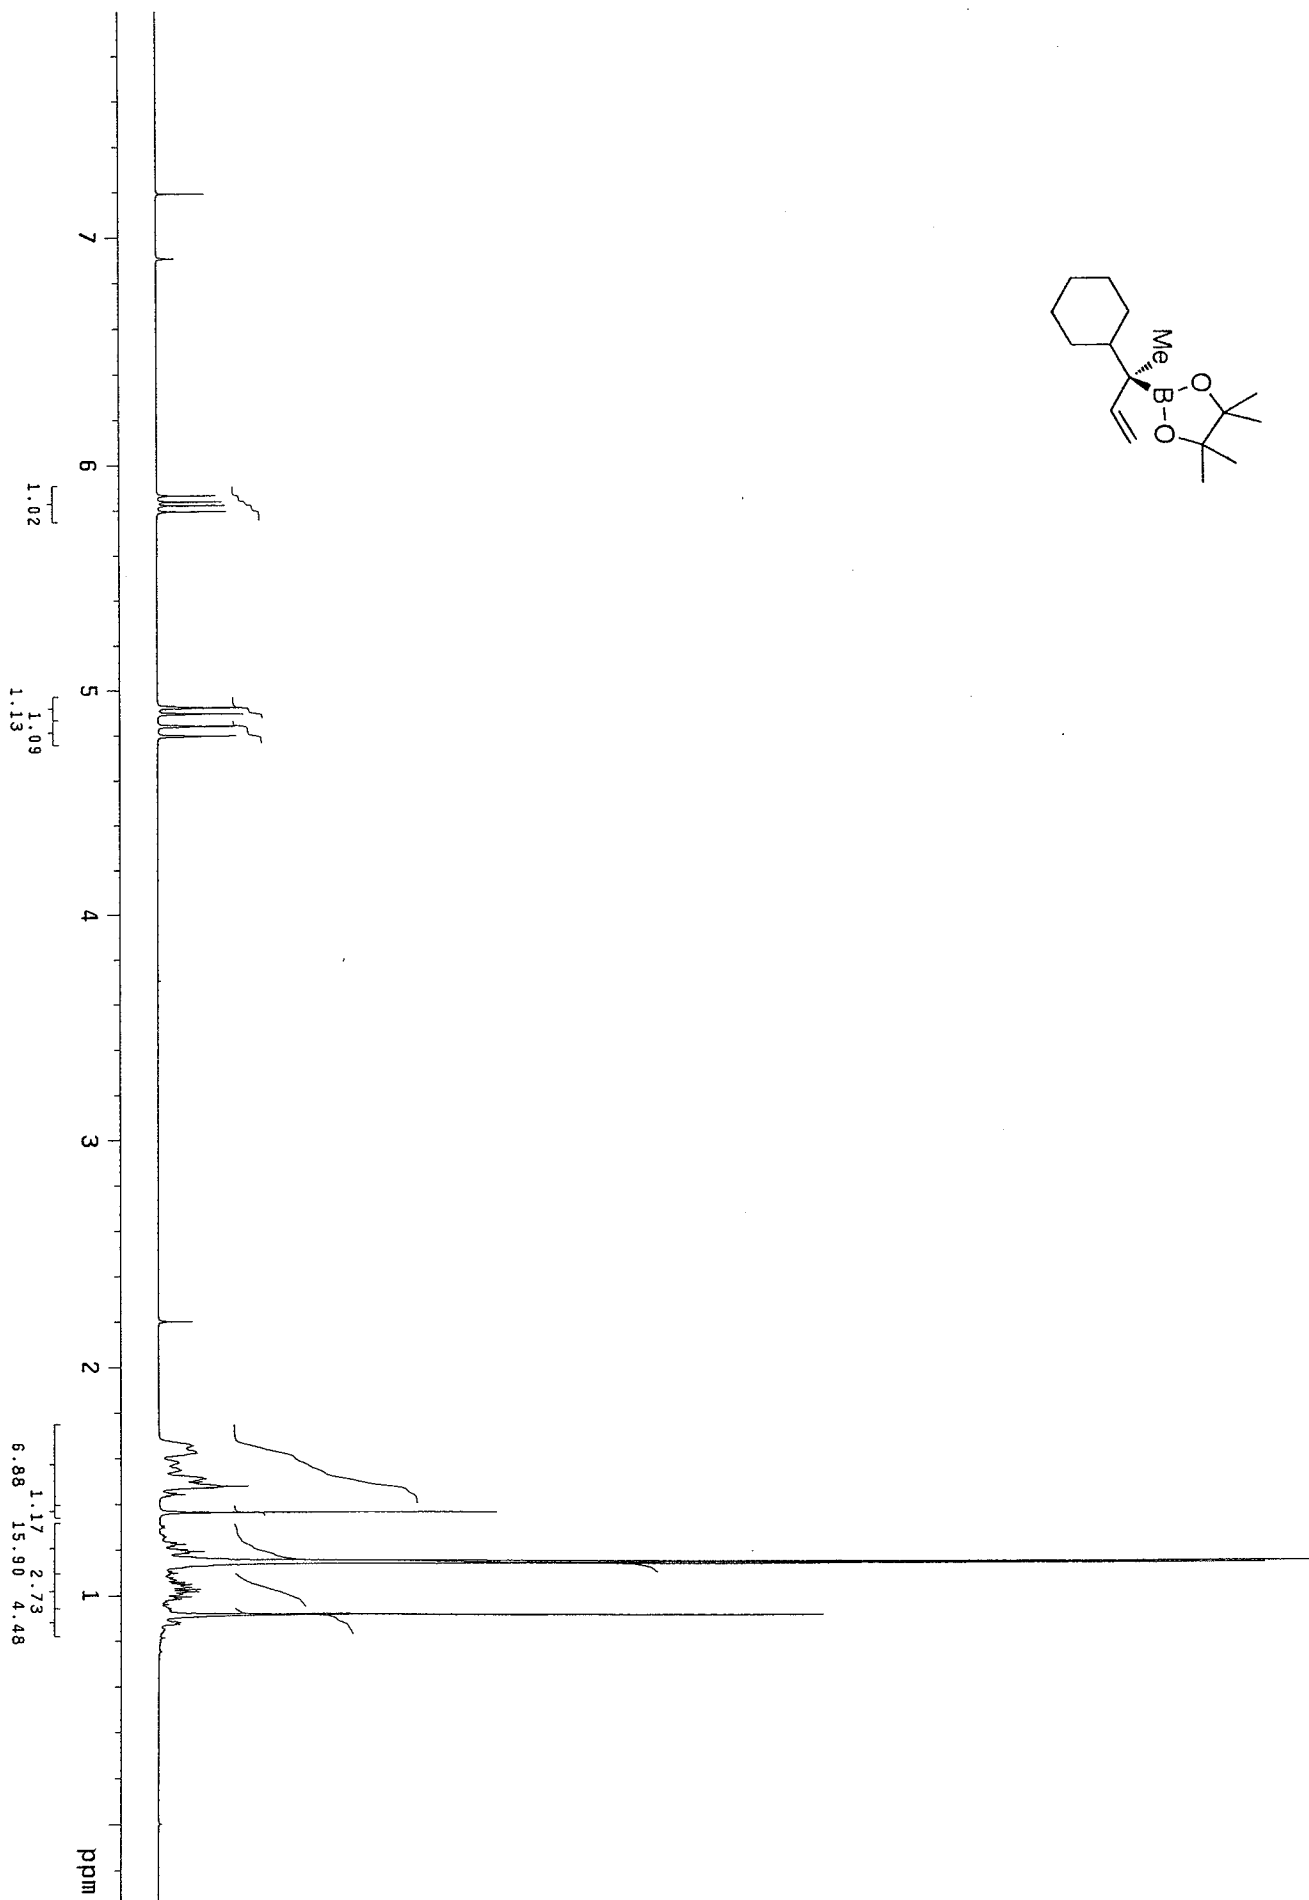

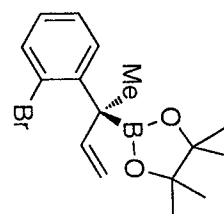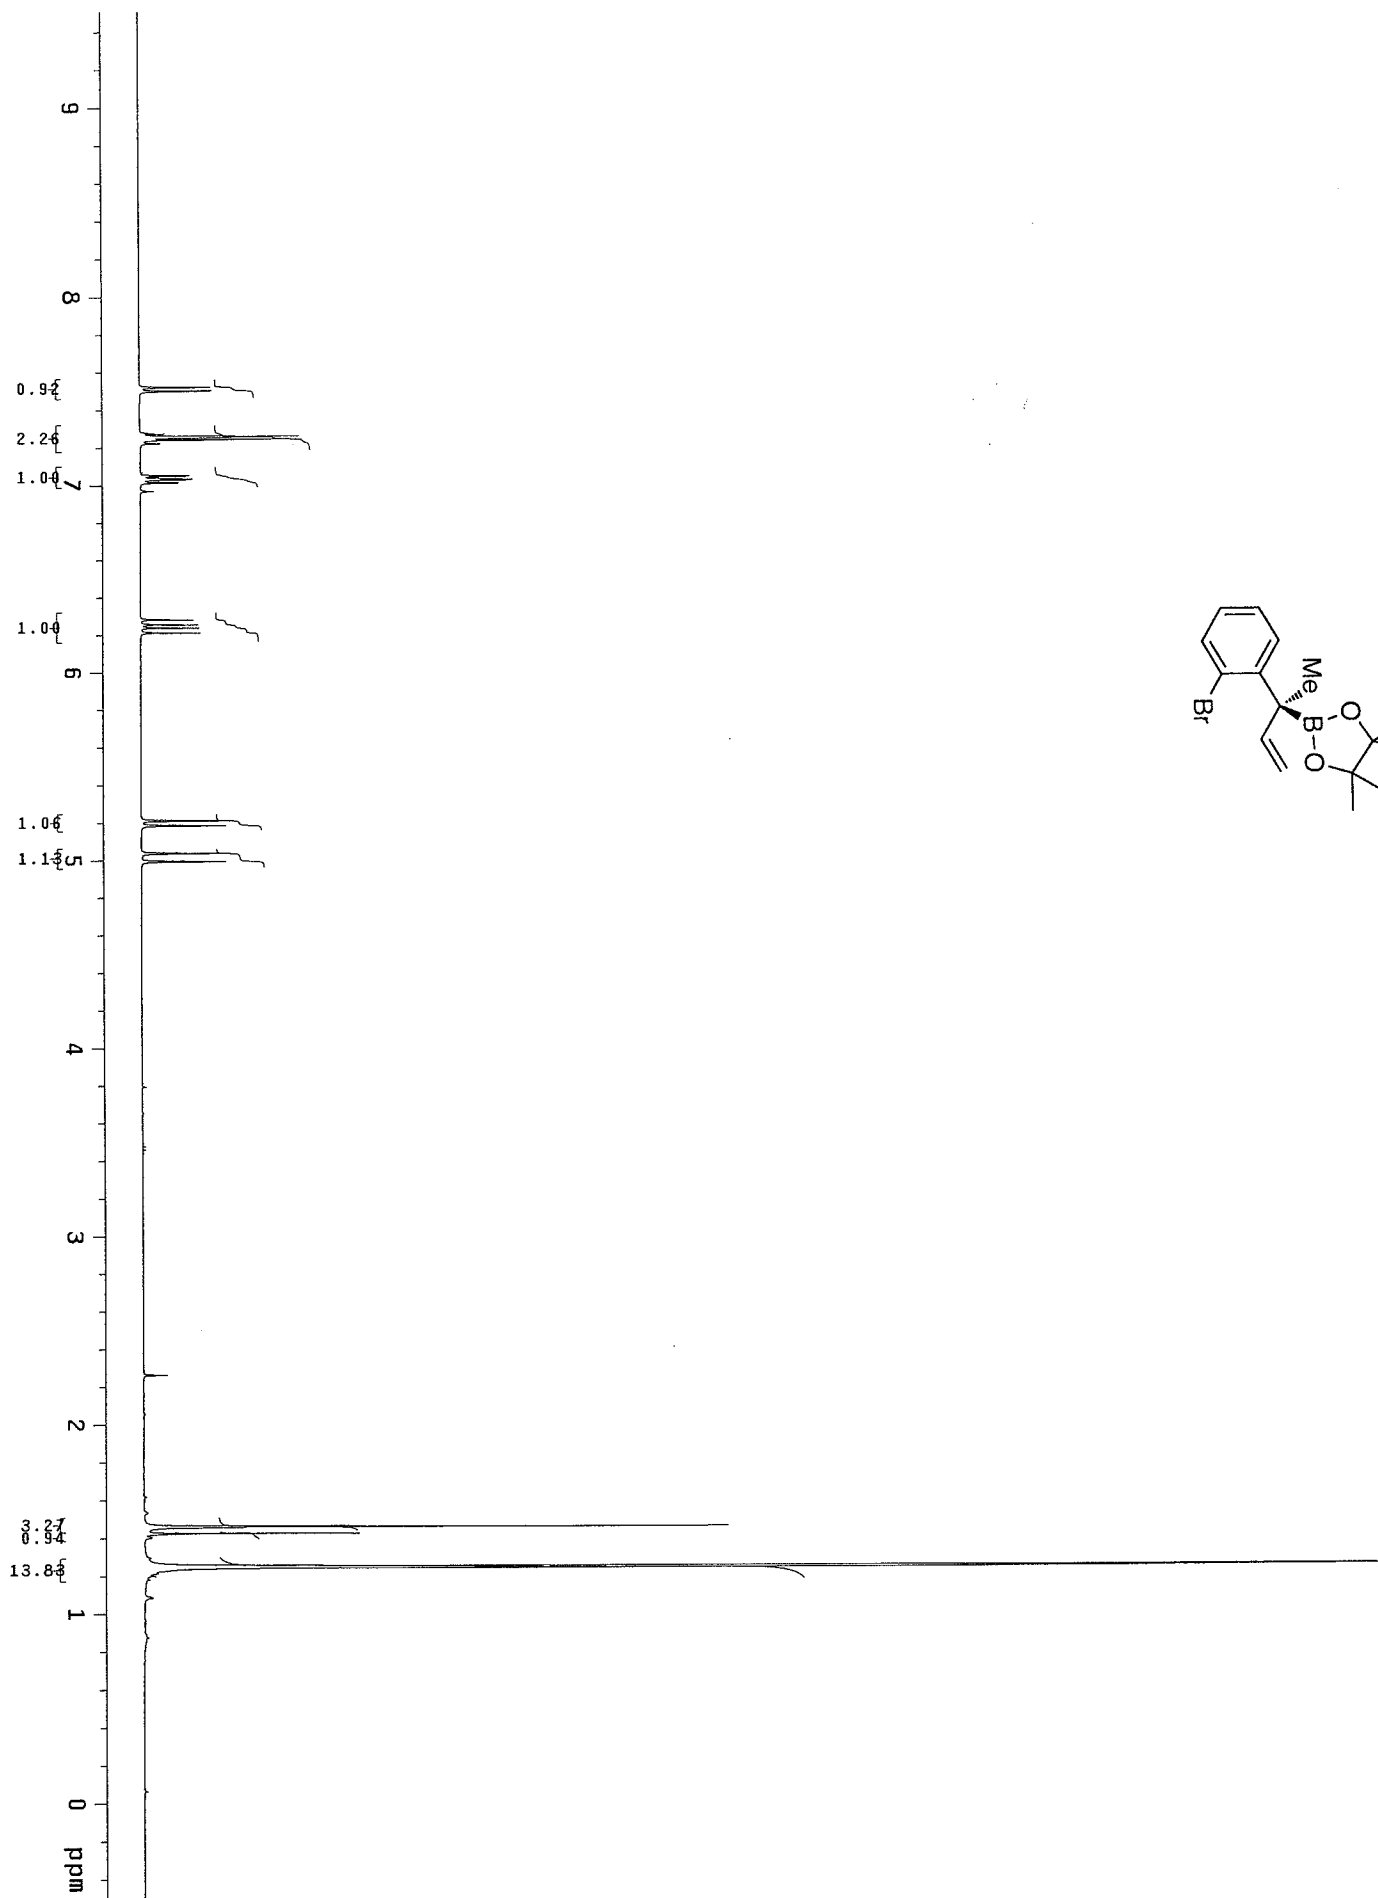

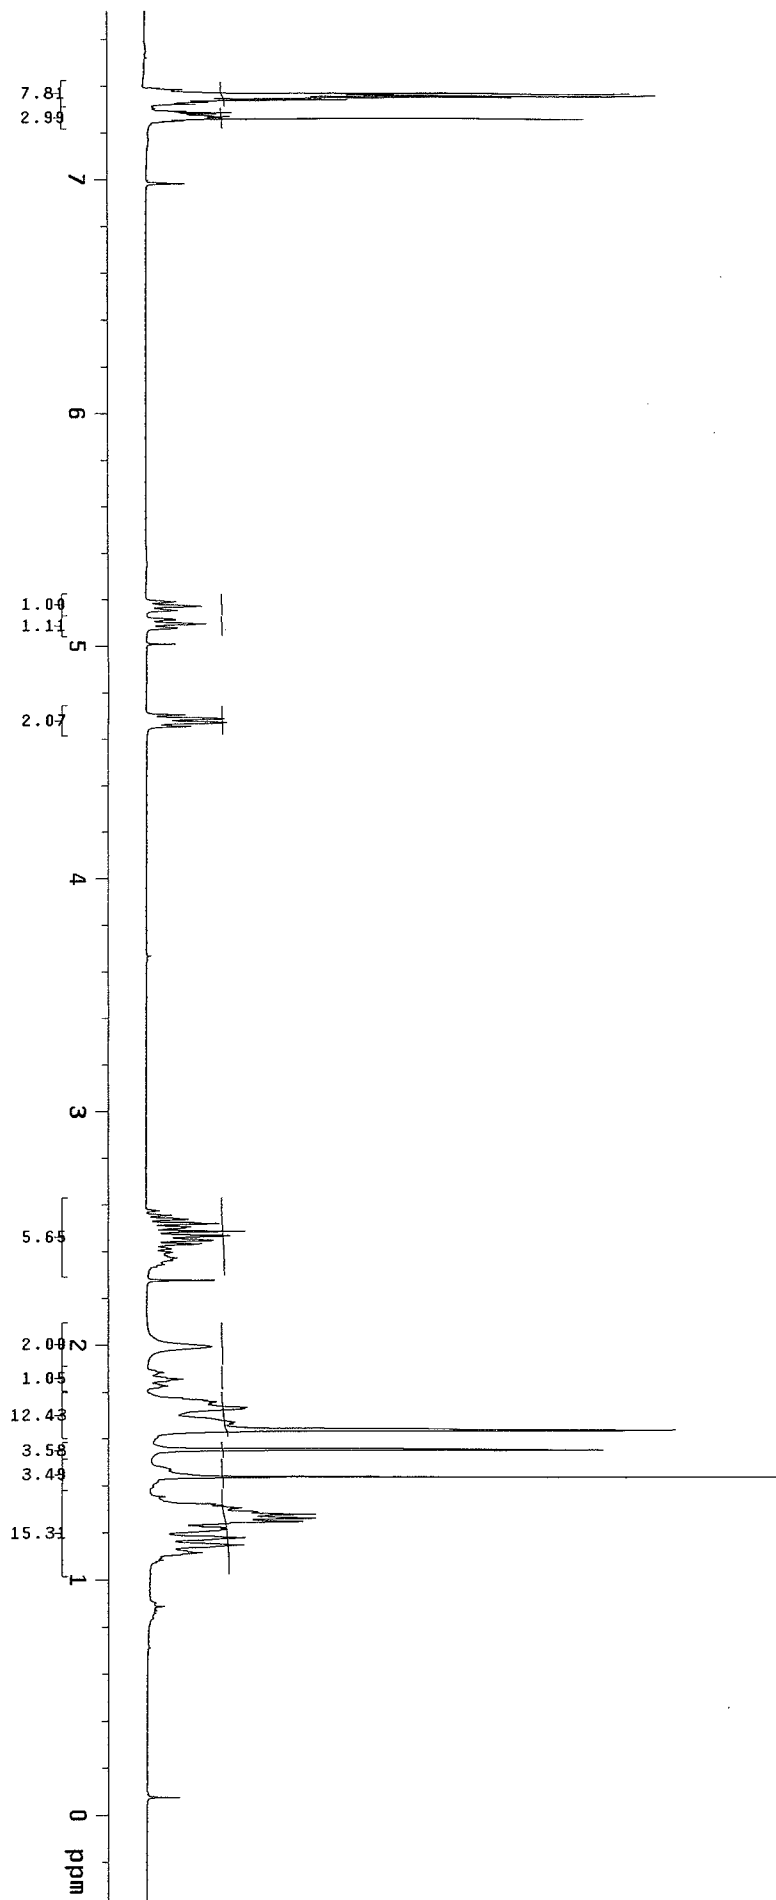

Supplement: NIHMS222573-supplement-2_si_002.pdf [file NIHMS222573-supplement-2_si_002.pdf]
