# Supplementary material
Source: PubMed Central journal article supplement (PMC2917266)
Supplement: NIHMS222573-supplement-1_si_001.pdf [file NIHMS222573-supplement-1_si_001.pdf]

# Enantioselective Synthesis of Allylboronates Bearing Tertiary or Quaternary B-Stereogenic Carbon by NHC-Cu-Catalyzed Substitution Reactions

Aikomari Guzman-Martinez and Amir H. Hoveyda\*

*Department of Chemistry, Merkert Chemistry Center,  
Boston College, Chestnut Hill, Massachusetts 02467*

## SUPPORTING INFORMATION, PART I

### List of Contents

|                               |              |
|-------------------------------|--------------|
| General .....                 | Page S2      |
| Reagents and Ligands .....    | Page S-3     |
| Copper Salt Screening .....   | Page S-4     |
| Synthesis of Substrates ..... | Page S5-S14  |
| Compound <b>9</b> .....       | Page S14     |
| Compound <b>10</b> .....      | Page S16     |
| Compound <b>11</b> .....      | Page S16     |
| Compounds in Table 2 .....    | Page S17-S21 |
| Compounds in Table 3 .....    | Page S21-S26 |
| Compound <b>13</b> .....      | Page S26     |
| Compound <b>14</b> .....      | Page S26     |
| Compound <b>15</b> .....      | Page S27     |

**General.** Infrared (IR) spectra were recorded on a Bruker FTIR Alpha (ATR mode) spectrophotometer,  $\nu_{\text{max}}$  in  $\text{cm}^{-1}$ . Bands are characterized as broad (br), strong (s), medium (m), and weak (w).  $^1\text{H}$  NMR spectra were recorded on a Varian Unity INOVA 400 (400 MHz) spectrometer. Chemical shifts are reported in ppm from tetramethylsilane with the solvent resonance as the internal standard ( $\text{CDCl}_3$ : 7.26 ppm). Data are reported as follows: chemical shift, integration, multiplicity (s = singlet, d = doublet, t = triplet, q = quartet, m = multiplet), and coupling constants (Hz).  $^{13}\text{C}$  NMR spectra were recorded on a Varian Unity INOVA 400 (100 MHz) spectrometer with complete proton decoupling. Chemical shifts are reported in ppm from tetramethylsilane with the solvent resonance as the internal standard ( $\text{CDCl}_3$ : 77.16 ppm). High resolution mass spectrometry was performed on a JEOL AccuTOF-DART (positive mode) at the Mass Spectrometry Facility, Boston College. Enantiomer ratios were determined by GLC analysis [Alltech Associated Chiraldex CDB/DM column (30m x 0.25 mm), Betadex 120 column (30 m x 0.25 mm), and Alphadex 120 column (30 m x 0.25 mm)] in comparison with authentic racemic materials. The inlet and detector temperatures are set to 250 °C and runs were isothermal of the temperature given using ultra high purity helium as the carrier gas. Other enantiomer ratios were determined by high performance liquid chromatography (HPLC) with a Shimadzu chromatograph [Chiral Technologies Chiralcel OD-H (4.6 x 250 mm)] in comparison with authentic racemic materials. Specific rotations were measured on a Rudolph Research Analytical Autopol IV Polarimeter. Unless otherwise noted, all reactions were carried out with distilled and degassed solvents under an atmosphere of dry  $\text{N}_2$  in oven- (135 °C) or flame-dried glassware with standard dry box or vacuum-line techniques. 1,2-Dimethoxyethane (Aldrich Chemical Co.) was purified by distillation from sodium benzophenone ketal immediately prior to use. Dichloromethane (Fisher Scientific) was purified by being passed through two alumina columns under a positive pressure of dry argon by a modified Innovative Technologies purification system. Tetrahydrofuran (Aldrich Chemical Co.) was purified by distillation from sodium benzophenone ketal immediately prior to use unless otherwise specified. All work-up and purification procedures were carried out with reagent grade solvents (purchased from Doe & Ingalls) under air.

## Reagents and Ligands:

**Benzoyl Chloride:** purchased from Aldrich Chemical Co. and used as received.

**Bis(pinacolato)diboron (1):** gifted from Frontier Scientific, Inc., dried overnight in vacuo.

***tert*-Butyldimethylsilyl chloride:** purchased from Aldrich Chemical Co. and used as received.

***meta*-Chloroperoxybenzoic acid:** purchased from Aldrich Chemical Co. and used as received.

**Copper (II) triflate (98%):** purchased from Aldrich Chemical Co. and used as received.

**Copper salts (for copper screening):** purchased from Strem and used as received.

**4-Dimethylaminopyridine:** purchased from Aldrich Chemical Co. and used as received.

***N,N*-Dimethylformamide (99.8%, Acroseal):** was purchased from Acros was used as received.

**Hydrogen peroxide (35 wt. % solution in water):** purchased from Aldrich Chemical Co. and used as received.

**Imidazole:** was purchased from Aldrich and used as received.

**Imidazolinium salt (2):** prepared according to previously reported procedures.<sup>1</sup>

**Imidazolinium salt (3):** prepared according to previously reported procedures.<sup>2</sup>

**Imidazolinium salt (4a-b):** prepared according to previously reported procedures.<sup>3</sup>

**Imidazolinium salt (5a-c):** prepared according to previously reported procedures.<sup>4</sup> (*opposite enantiomers to what is shown in publication*)

**Imidazolinium salt (6,7):** prepared according to previously reported procedures.<sup>5</sup>

**Periodic acid:** purchased from Aldrich Chemical Co. and used as received.

**Pyridine (anhydrous):** purchased from Aldrich Chemical Co. and used as received.

**Sodium borohydride:** purchased from Aldrich Chemical Co. and used as received.

**Sodium *tert*-butoxide (98%):** purchased from Strem Chemicals Inc. and used as received.

**Sodium hydride (60% in mineral oil):** purchased from Strem Chemicals Inc. and used as received.

**Sodium methoxide (98%):** purchased from Strem Chemicals Inc. and used as received.

---

(1) Van Veldhuizen, J. J.; Campbell, J. E. ; Giudici, R. E.; Hoveyda, A. H. *J. Am. Chem. Soc.* **2005**, *127*, 6877–6882.

(2) Clavier, H.; Coutable, L.; Toupet, L.; Guillemin, J.-C.; Mauduit, M. *J. Organometallic Chem.* **2005**, *690*, 5237–5254.

(3) Brown, M. K.; May, T. L.; Baxter, C. A.; Hoveyda, A. H. *Angew. Chem., Int. Ed.* **2007**, *46*, 1097–1100.

(4) (a) Lee, Y.; Akiyama, K.; Gillingham, D. G.; Brown, M. K.; Hoveyda, A. H. *J. Am. Chem. Soc.* **2008**, *130*, 446–447. (b) Akiyama, K.; Gao, F.; Hoveyda, A. H. *Angew. Chem., Int. Ed.* **2010**, *49*, 419–423.

(5) Lee, K.-s.; Hoveyda, A. H. *J. Org. Chem.* **2009**, *74*, 4455–4462.

**Table 1.** Evaluation of Cu Salts<sup>a</sup>

| entry | Cu salt                                | temp (°C) | conv (%) <sup>b</sup> | yield (%) <sup>c</sup> | er <sup>d</sup> |
|-------|----------------------------------------|-----------|-----------------------|------------------------|-----------------|
| 1     | CuCl                                   | 22        | 75                    | 70                     | 77:23           |
| 2     | CuBr                                   | 22        | 41                    | 40                     | 78:22           |
| 3     | CuI                                    | 22        | 23                    | 21                     | 81:19           |
| 4     | (CuOTf) <sub>2</sub> ·tol              | 22        | >98                   | 72                     | 72:28           |
| 5     | CuTC                                   | 22        | >98                   | 97                     | 76:24           |
| 6     | CuTC                                   | -30       | 43                    | 41                     | 80:20           |
| 7     | CuCN                                   | 22        | 42                    | 38                     | 77:23           |
| 8     | CuOAc                                  | 22        | 70                    | 54                     | 69:31           |
| 9     | CuCl <sub>2</sub> ·2H <sub>2</sub> O   | 22        | 35                    | 27                     | 79:21           |
| 10    | CuCl <sub>2</sub>                      | 22        | 83                    | 80                     | 77:23           |
| 11    | CuBr <sub>2</sub>                      | 22        | 11                    | 10                     | 75:25           |
| 12    | Cu(OTf) <sub>2</sub>                   | 22        | >98                   | 94                     | 83:17           |
| 13    | Cu(OTf) <sub>2</sub>                   | -30       | 81                    | 76                     | 85:15           |
| 14    | Cu(OAc) <sub>2</sub> ·H <sub>2</sub> O | 22        | >98                   | 93                     | 81:19           |
| 15    | Cu(OAc) <sub>2</sub> ·H <sub>2</sub> O | -30       | 46                    | 43                     | 83:17           |

<sup>a</sup> Reactions were performed under N<sub>2</sub> atm; >98% site selectivity in all cases (e.g., <2% S<sub>N</sub>2 product). <sup>b</sup> Values determined by analysis of 400 MHz <sup>1</sup>H NMR spectra of unpurified mixtures. <sup>c</sup> Yields of Purified products. <sup>d</sup> By GLC analysis. (see page S-14).

■ ■ **Preparation of Substrates:** Allylic alcohols were synthesized from the corresponding aldehydes or ketones by a two-step Horner-Wadsworth-Emmons olefination<sup>6</sup>/dibal-H reduction<sup>7</sup> sequence. Allylic alcohols were converted to the corresponding allylic carbonates based on well-established methods.<sup>8</sup> Physical attributes of compounds that have not been previously reported are presented below.

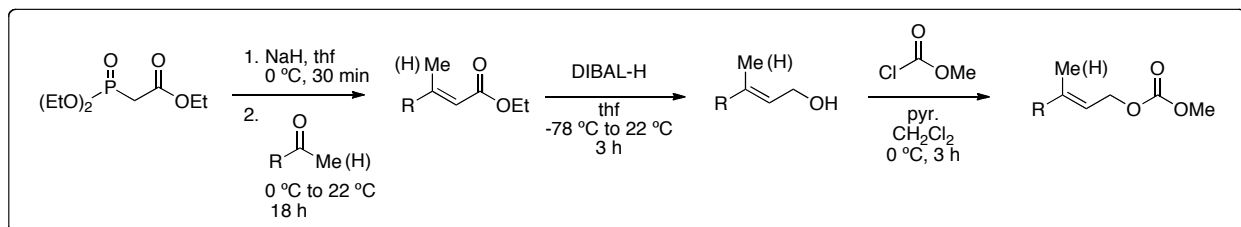

(6) (a) Martyn, D. C.; Hoult, D. A.; Abell, A. D. *Aust. J. Chem.* **2001**, *54*, 391–396. (b) Dyker, G.; Grundt, P. *Helv. Chim. Acta* **1999**, *82*, 588–596.

(7) Clive, D. L. J.; Stoffman, E. J. L. *Chem. Comm.* **2007**, *21*, 2151–2153.

(8) (a) Meyers, A. I.; Tomioka, K.; Ronald, D. M.; Comins, D. *Tetrahedron Lett.* **1978**, *19*, 1375–1378. (b) Hu, T.; Corey, E. J. *Org. Lett.*, **2002**, *4*, 2441–2443.

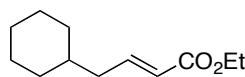

**(E)-Ethyl 4-cyclohexylbut-2-enoate:** IR (neat): 2922 (m), 2851 (w), 1718 (s), 1654 (w), 1448 (w), 1367 (w), 1306 (w), 1264 (m), 1206 (w), 1163 (m), 1132 (w), 1045 (m), 983 (w)  $\text{cm}^{-1}$ ;  $^1\text{H}$  NMR (400 MHz,  $\text{CDCl}_3$ ):  $\delta$  6.93 (1H, dt,  $J = 15.5, 7.6$  Hz), 5.78 (1H, dt,  $J = 15.7, 1.4$  Hz), 4.17 (2H, q,  $J = 7.1$  Hz), 2.08 (2H, t,  $J = 7.8$  Hz), 1.71-1.62 (5H, m), 1.47-1.36 (1H, m), 1.28 (3H, t,  $J = 7.2$  Hz), 1.25-1.07 (3H, m), 0.97-0.87 (2H, m);  $^{13}\text{C}$  NMR (100 MHz,  $\text{CDCl}_3$ ):  $\delta$  166.7, 148.2, 122.1, 60.1, 40.1, 37.2, 33.1, 26.3, 26.2, 14.3; HRMS (ESI<sup>+</sup>): Calcd for  $\text{C}_{12}\text{H}_{21}\text{O}_2$   $[\text{M}+\text{H}]^+$ : 197.15415, Found: 197.15441.

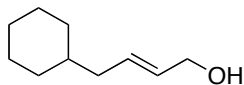

**(E)-4-Cyclohexylbut-2-en-1-ol:** IR (neat): 3312 (br), 2919 (s), 2850 (m), 1670 (w), 1447 (m), 1366 (w), 1262 (w), 1094 (w), 1070 (w), 1046 (w), 999 (m), 968 (s), 889 (w), 843 (w), 665 (w)  $\text{cm}^{-1}$ ;  $^1\text{H}$  NMR (400 MHz,  $\text{CDCl}_3$ ):  $\delta$  5.71-5.57 (2H, m), 4.08 (2H, t,  $J = 4.4$  Hz), 1.94 (2H, t,  $J = 6.7$  Hz), 1.71-1.61 (5H, m), 1.34-1.07 (5H, m), 0.93-0.83 (2H, m);  $^{13}\text{C}$  NMR (100 MHz,  $\text{CDCl}_3$ ):  $\delta$  132.0, 129.8, 63.8, 40.2, 37.7, 33.0, 26.5, 26.2; HRMS (ESI<sup>+</sup>): Calcd for  $\text{C}_{10}\text{H}_{17}$   $[\text{M}-\text{OH}]^+$ : 137.13303, Found: 137.13323.

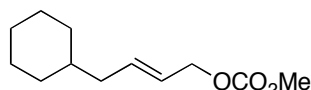

**(E)-4-Cyclohexylbut-2-en-1-yl methyl carbonate:** IR (neat): 2921 (m), 2850 (w), 1746 (s), 1672 (w), 1587 (w), 1443 (m), 1381 (w), 1250 (s), 1114 (w), 972 (m), 941 (s), 899 (w), 844 (w), 791 (m)  $\text{cm}^{-1}$ ;  $^1\text{H}$  NMR (400 MHz,  $\text{CDCl}_3$ ):  $\delta$  5.83-5.75 (1H, m), 5.60-5.52 (1H, m), 4.57 (2H, dd,  $J = 6.5, 1.0$  Hz), 3.78 (3H, s), 1.95 (2H, t,  $J = 7.0$  Hz), 1.70-1.61 (5H, m), 1.35-1.08 (4H, m), 0.92-0.84 (2H, m);  $^{13}\text{C}$  NMR (100 MHz,  $\text{CDCl}_3$ ):  $\delta$  155.7, 136.1, 124.1, 68.7, 54.7, 40.2, 37.6, 33.0, 26.5, 26.2; HRMS (ESI<sup>+</sup>): Calcd for  $\text{C}_{10}\text{H}_{17}$   $[\text{M}-\text{OCO}_2\text{Me}]^+$ : 137.13303, Found: 137.13370.

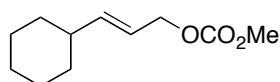

**(E)-3-Cyclohexylallyl methyl carbonate:** IR (neat): 2923 (m), 2851 (w), 1746 (s), 1670 (w), 1442 (m), 1382 (w), 1250 (s), 1116 (w), 1088 (w), 970 (m), 940 (m), 899 (w), 791 (m), 508 (w)  $\text{cm}^{-1}$ ;  $^1\text{H}$  NMR (400 MHz,  $\text{CDCl}_3$ ):  $\delta$  5.76 (1H, dd,  $J = 15.6, 6.6$  Hz), 5.67-5.49 (1H, m), 4.57 (2H, d,  $J = 6.6$  Hz), 3.78 (3H, s), 1.99-1.97 (1H, m), 1.74-1.62 (5H, m), 1.31-1.02 (5H, m);  $^{13}\text{C}$  NMR (100 MHz,  $\text{CDCl}_3$ ):  $\delta$  155.6, 142.9, 120.6, 68.9, 54.6, 40.3, 32.4, 26.0, 25.9; HRMS (ESI<sup>+</sup>): Calcd for  $\text{C}_9\text{H}_{15}$   $[\text{M}-\text{OCO}_2\text{Me}]^+$ : 123.11683, Found: 123.11454.

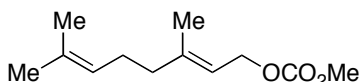

**(E)-3,7-Dimethylocta-2,6-dien-1-yl methyl carbonate:** IR (neat): 2959 (br, w), 2918 (br, w), 2857 (br, w), 1745 (s), 1670 (w), 1588 (w), 1441 (m), 1379 (w), 1340 (w), 1251 (s), 1108 (w), 938 (m), 903 (w), 833 (w), 792 (m)  $\text{cm}^{-1}$ ;  $^1\text{H}$  NMR (400 MHz,  $\text{CDCl}_3$ ):  $\delta$  5.40-5.37 (1H, m), 5.09-5.05 (1H, m), 4.65 (2H, dd,  $J = 7.2, 0.6$  Hz), 3.77 (3H, s), 2.13-2.02 (4H, m), 1.72 (3H, s), 1.68 (3H, s), 1.59 (3H, s);  $^{13}\text{C}$  NMR (100 MHz,  $\text{CDCl}_3$ ):  $\delta$  155.9, 143.2, 131.9, 123.6, 117.7, 64.7, 54.6, 39.5, 26.2, 25.6, 17.5, 16.5; HRMS (ESI<sup>+</sup>): Calcd for  $\text{C}_{10}\text{H}_{17}$   $[\text{M}-\text{OCO}_2\text{Me}]^+$ : 137.13303, Found: 137.13351.

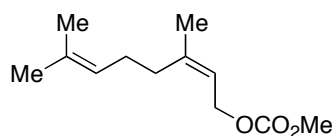

**(Z)-3,7-Dimethylocta-2,6-dien-1-yl methyl carbonate:** IR (neat): 2961 (br, w), 2917 (br, w), 2857 (br, w), 1745 (s), 1670 (w), 1442 (m), 1378 (w), 1347 (w), 1251 (s), 1108 (w), 1043 (w), 937 (m), 904 (w), 830 (w), 792 (m)  $\text{cm}^{-1}$ ;  $^1\text{H}$  NMR (400 MHz,  $\text{CDCl}_3$ ):  $\delta$  5.39-5.35 (1H, m), 5.10-5.06 (1H, m), 4.61 (2H, d,  $J = 7.4$  Hz), 3.76 (3H, d,  $J = 0.8$  Hz), 2.14-2.06 (4H, m), 1.76 (3H, s), 1.67 (3H, s), 1.59 (3H, s);  $^{13}\text{C}$  NMR (100 MHz,  $\text{CDCl}_3$ ):  $\delta$  155.8, 143.2, 132.2, 123.5, 118.6, 64.4, 54.6, 32.1, 26.6, 25.6, 23.4, 17.6; HRMS (ESI+): Calcd for  $\text{C}_{10}\text{H}_{17}$  [ $\text{M}-\text{OCO}_2\text{Me}$ ] $^+$ : 137.13303, Found: 137.13260.

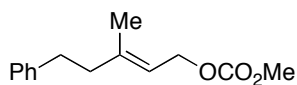

**(E)-Methyl (3-methyl-5-phenylpent-2-en-1-yl) carbonate** IR (neat): 3027 (w), 2954 (br, w), 2857 (w), 1743 (s), 1670 (w), 1602 (w), 1495 (w), 1441 (m), 1382 (w), 1340 (w), 1251 (s), 1115 (w), 1076 (w), 936 (m), 903 (w), 791 (m), 745 (w), 698 (m), 582 (w), 521 (w), 465 (w)  $\text{cm}^{-1}$ ;  $^1\text{H}$  NMR (400 MHz,  $\text{CDCl}_3$ ):  $\delta$  7.36-7.25 (2H, m), 7.20-7.16 (3H, m), 5.42-5.37 (1H, m), 4.65 (2H, dd,  $J = 7.2, 0.7$  Hz), 3.78 (3H, s), 2.76-2.72 (2H, m), 2.34 (2H, t,  $J = 8.0$  Hz), 1.77 (3H, s);  $^{13}\text{C}$  NMR (100 MHz,  $\text{CDCl}_3$ ):  $\delta$  155.8, 142.6, 141.7, 128.2, 125.8, 118.2, 64.5, 54.6, 41.3, 34.1, 16.6; HRMS (ESI+): Calcd for  $\text{C}_{12}\text{H}_{15}$  [ $\text{M}-\text{OCO}_2\text{Me}$ ] $^+$ : 159.11738, Found: 159.11714.

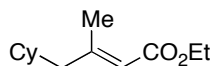

**(E)-Ethyl 4-cyclohexyl-3-methylbut-2-enoate:** IR (neat): 2980 (w), 2922 (m), 2850 (w), 1715 (s), 1647 (w), 1448 (w), 1381 (w), 1368 (w), 1323 (w), 1268 (w), 1220 (s), 1146 (s), 1126 (m), 1096 (w), 1073 (m), 983 (w)  $\text{cm}^{-1}$ ;  $^1\text{H}$  NMR (400 MHz,  $\text{CDCl}_3$ ):  $\delta$  5.61-5.60 (1H, m), 4.12 (2H, q,  $J = 7.1$  Hz), 2.12 (3H, t,  $J = 1.0$  Hz), 1.99 (2H, d,  $J = 7.0$  Hz), 1.71-1.62 (5H, m), 1.55-1.45 (1H, m), 1.28-1.10 (6H, m), 0.91-0.81 (2H, m);  $^{13}\text{C}$  NMR (100 MHz,  $\text{CDCl}_3$ ):  $\delta$  166.7, 158.8, 116.6, 59.4, 49.1, 35.6, 33.2, 26.4, 26.2, 18.7, 14.3; HRMS (ESI+): Calcd for  $\text{C}_{13}\text{H}_{23}\text{O}_2$  [ $\text{M}+\text{H}$ ] $^+$ : 211.16980, Found: 211.16990.

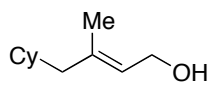

**(E)-4-Cyclohexyl-3-methylbut-2-en-1-ol:** IR (neat): 3313 (br), 2918 (s), 2849 (m), 1667 (w), 1447 (m), 1381 (w), 1268 (w), 1239 (w), 1182 (w), 1093 (w), 1060 (w), 995 (s), 892 (w), 845 (w), 769 (w), 733 (w), 585 (w), 513 (w), 485 (w)  $\text{cm}^{-1}$ ;  $^1\text{H}$  NMR (400 MHz,  $\text{CDCl}_3$ ):  $\delta$  5.36 (1H, td,  $J = 6.8, 1.0$  Hz), 4.13 (2H, d,  $J = 6.9$  Hz), 1.88 (2H, d,  $J = 7.2$  Hz), 1.70-1.62 (8H, m), 1.47-1.35 (2H, m), 1.26-1.07 (3H, m), 0.89-0.78 (2H, m);  $^{13}\text{C}$  NMR (100 MHz,  $\text{CDCl}_3$ ):  $\delta$  138.4, 124.6, 59.3, 47.8, 35.4, 33.2, 26.5, 26.3, 16.2; HRMS (ESI+): Calcd for  $\text{C}_{11}\text{H}_{21}\text{O}$  [ $\text{M}+\text{H}$ ] $^+$ : 169.15924, Found: 169.15927.

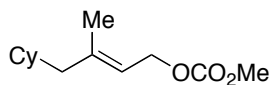

**(E)-4-Cyclohexyl-3-methylbut-2-en-1-yl methyl carbonate:** IR (neat): 2920 (m), 2850 (w), 1745 (s), 1668 (w), 1442 (m), 1382 (w), 1341 (w), 1249 (s), 1112 (w), 1062 (w), 938 (m), 903 (w), 845 (m), 792 (w), 770 (w), 571 (w)  $\text{cm}^{-1}$ ;  $^1\text{H}$  NMR (400 MHz,  $\text{CDCl}_3$ ):  $\delta$  5.34-5.30 (1H, m), 4.64 (2H, d,  $J = 7.0$  Hz), 3.76 (3H, s), 1.90 (2H, d,  $J = 7.2$  Hz), 1.70-1.60 (8H, m), 1.45-1.36 (1H, m), 1.25-1.07 (3H, m), 0.88-0.77 (2H, m);  $^{13}\text{C}$  NMR

(100 MHz, CDCl<sub>3</sub>):  $\delta$  155.8, 141.9, 118.9, 64.7, 54.6, 47.8, 35.3, 33.2, 26.5, 26.3, 16.4; HRMS (ESI+): Calcd for C<sub>11</sub>H<sub>19</sub> [M-OCO<sub>2</sub>Me]<sup>+</sup>: 151.14868, Found: 151.14823.

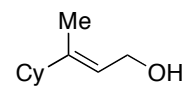 **(E)-3-Cyclohexylbut-2-en-1-ol:** IR (neat): 3309 (br), 2922 (s), 2851 (m), 1662 (w), 1447 (m), 1379 (w), 1261 (w), 1229 (w), 1187 (w), 1078 (w), 995 (s), 891 (w), 858 (w), 840 (w), 806 (w), 761 (w), 618 (w), 528 (w), 435 (w) cm<sup>-1</sup>; <sup>1</sup>H NMR (400 MHz, CDCl<sub>3</sub>):  $\delta$  5.41-5.37 (1H, m), 4.16 (2H, t, *J* = 6.2 Hz), 1.88-1.65 (9H, m), 1.36-1.07 (6H, m); <sup>13</sup>C NMR (100 MHz, CDCl<sub>3</sub>):  $\delta$  121.5, 59.4, 47.1, 31.7, 31.5, 26.6, 26.3, 14.6; HRMS (ESI+): Calcd for C<sub>10</sub>H<sub>17</sub> [M-OH]<sup>+</sup>: 137.13303, Found: 137.13331.

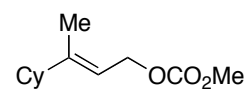 **(E)-3-Cyclohexylbut-2-en-1-yl methyl carbonate:** IR (neat): 3309 (br), 2922 (s), 2851 (m), 1662 (w), 1447 (m), 1379 (w), 1261 (w), 1229 (w), 1187 (w), 1078 (w), 995 (s), 891 (w), 858 (w), 840 (w), 806 (w), 761 (w), 618 (w), 528 (w), 435 (w) cm<sup>-1</sup>; <sup>1</sup>H NMR (400 MHz, CDCl<sub>3</sub>):  $\delta$  5.37-5.33 (1H, m), 4.66 (2H, d, *J* = 7.0 Hz), 3.78 (3H, s), 1.90-1.84 (1H, m), 1.78-1.66 (8H, m), 1.32-1.08 (5H, m); <sup>13</sup>C NMR (100 MHz, CDCl<sub>3</sub>):  $\delta$  155.9, 148.1, 115.8, 64.9, 54.6, 47.1, 31.5, 26.5, 26.2, 14.9; HRMS(ESI+): Calcd for C<sub>10</sub>H<sub>17</sub> [M-OCO<sub>2</sub>Me]<sup>+</sup>: 137.13248, Found: 137.13385.

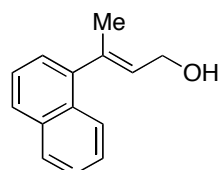 **(E)-3-(Naphthalen-1-yl)but-2-en-1-ol:** IR (neat): 3332 (br, w), 3058 (w), 2976 (w), 2915 (w), 2871 (w), 1661 (w), 1590 (w), 1506 (w), 1438 (w), 1394 (w), 1375 (w), 1337 (w), 1246 (w), 1215 (w), 1181 (w), 1090 (w), 1061 (w), 998 (m), 907 (w), 863 (w), 799 (s), 729 (s), 648 (w), 609 (w), 573 (w), 500 (w), 472 (w), 432 (w) cm<sup>-1</sup>; <sup>1</sup>H NMR (400 MHz, CDCl<sub>3</sub>):  $\delta$  7.97-7.93 (1H, m), 7.88-7.83 (1H, m), 7.76 (1H, d, *J* = 8.4 Hz), 7.49-7.41 (3H, m), 7.29-7.27 (1H, m), 5.78-5.74 (1H, m), 4.46 (2H, d, *J* = 6.7 Hz), 2.15 (3H, d, *J* = 0.8 Hz); <sup>13</sup>C NMR (100 MHz, CDCl<sub>3</sub>):  $\delta$  142.8, 138.4, 133.7, 130.8, 129.3, 128.3, 127.2, 125.8, 125.6, 125.5, 125.3, 124.7, 59.6, 19.1; HRMS (ESI+): Calcd for C<sub>14</sub>H<sub>13</sub> [M-OH]<sup>+</sup>: 181.10173, Found: 181.10197.

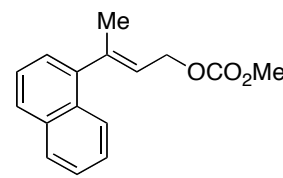 **(E)-Methyl (3-(naphthalen-1-yl)but-2-en-1-yl) carbonate:** IR (neat): 3043 (w), 2956 (w), 2854 (w), 1743 (s), 1659 (w), 1590 (w), 1506 (w), 1441 (m), 1376 (w), 1323 (w), 1251 (s), 1184 (w), 1137 (w), 1108 (w), 1011 (w), 940 (m), 904 (w), 864 (w), 800 (m), 790 (m), 775 (s), 738 (w), 652 (w), 612 (w), 575 (w), 519 (w), 495 (w), 468 (w), 449 (w), 427 (w) cm<sup>-1</sup>; <sup>1</sup>H NMR (400 MHz, CDCl<sub>3</sub>):  $\delta$  7.93-7.89 (1H, m), 7.87-7.83 (1H, m), 7.77 (1H, d, *J* = 8.4 Hz), 7.49-7.40 (3H, m), 7.28-7.25 (1H, m), 5.74-5.70 (1H, m), 4.94 (2H, d, *J* = 6.9 Hz), 3.83 (3H, s), 2.20 (3H, t, *J* = 0.6 Hz); <sup>13</sup>C NMR (100 MHz, CDCl<sub>3</sub>):  $\delta$  155.9, 142.4, 141.8, 133.7, 130.7, 128.3, 127.4, 125.9, 125.7, 125.5, 125.3, 124.7, 123.7, 64.6, 54.8, 19.4; HRMS (ESI+): Calcd for C<sub>14</sub>H<sub>13</sub> [M-OCO<sub>2</sub>Me]<sup>+</sup>: 181.10173, Found: 181.10128.

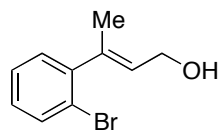

**(E)-3-(2-Bromophenyl)but-2-en-1-ol:** IR (neat): 3299 (br, w), 3053 (w), 2917 (w), 2871 (w), 1661 (w), 1587 (w), 1559 (w), 1466 (w), 1430 (w), 1375 (w), 1284 (w), 1247 (w), 1212 (w), 1111 (w), 1072 (w), 1019 (m), 1000 (m), 942 (w), 751 (s), 726 (m), 659 (w), 604 (w), 561 (w), 549 (w), 446 (w)  $\text{cm}^{-1}$ ;  $^1\text{H}$  NMR (400 MHz,  $\text{CDCl}_3$ ):  $\delta$  7.54 (1H, dd,  $J = 8.0, 1.2$  Hz), 7.29-7.24 (1H, m), 7.18-7.10 (2H, m), 5.62-5.58 (1H, m), 4.35 (2H, t,  $J = 5.7$  Hz), 2.02 (3H, d,  $J = 0.8$  Hz), 1.32 (1H, t,  $J = 5.5$  Hz);  $^{13}\text{C}$  NMR (100 MHz,  $\text{CDCl}_3$ ):  $\delta$  145.3, 139.3, 132.7, 129.7, 129.3, 128.3, 127.2, 121.8, 59.4, 17.8; HRMS (ESI<sup>+</sup>): Calcd for  $\text{C}_{10}\text{H}_{10}\text{Br}$  [M-OH]<sup>+</sup>: 208.99659, Found: 208.99594.

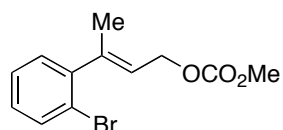

**(E)-3-(2-Bromophenyl)but-2-en-1-yl methyl carbonate:** IR (neat): 2956 (w), 1744 (s), 1662 (w), 1588 (w), 1560 (w), 1467 (w), 1441 (m), 1377 (w), 1330 (w), 1252 (s), 1119 (w), 1024 (w), 943 (s), 905 (w), 851 (w), 791 (m), 753 (s), 727 (w), 659 (w), 559 (w), 456 (w)  $\text{cm}^{-1}$ ;  $^1\text{H}$  NMR (400 MHz,  $\text{CDCl}_3$ ):  $\delta$  7.54 (1H, dd,  $J = 8.0, 1.2$  Hz), 7.28-7.24 (1H, m), 7.17-7.10 (2H, m), 5.59-5.54 (1H, m), 4.83 (2H, dd,  $J = 6.8, 0.8$  Hz), 3.81 (3H, s), 2.07-2.06 (3H, m);  $^{13}\text{C}$  NMR (100 MHz,  $\text{CDCl}_3$ ):  $\delta$  155.8, 144.9, 142.4, 132.7, 129.6, 128.6, 127.2, 123.8, 121.6, 64.4, 54.8, 18.0; HRMS (ESI<sup>+</sup>): Calcd for  $\text{C}_{10}\text{H}_{10}\text{Br}$  [M- $\text{OCO}_2\text{Me}$ ]<sup>+</sup>: 208.99659, Found: 208.99685.

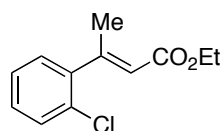

**(E)-Ethyl 3-(2-chlorophenyl)but-2-enoate:** IR (neat): 3057 (w), 2980 (w), 1714 (s), 1642 (w), 1591 (w), 1565 (w), 1471 (w), 1430 (w), 1367 (w), 1341 (w), 1287 (w), 1246 (w), 1172 (s), 1128 (w), 1093 (w), 1041 (m), 945 (w), 878 (w), 758 (m), 676 (w), 592 (w), 569 (w), 545 (w), 456 (w)  $\text{cm}^{-1}$ ;  $^1\text{H}$  NMR (400 MHz,  $\text{CDCl}_3$ ):  $\delta$  7.40-7.36 (1H, m), 7.28-7.22 (2H, m), 7.19-7.15 (1H, m), 5.83 (1H, q,  $J = 1.4$  Hz), 4.22 (2H, q,  $J = 7.2$  Hz), 2.49 (3H, d,  $J = 1.6$  Hz), 1.32 (3H, t,  $J = 7.2$  Hz);  $^{13}\text{C}$  NMR (100 MHz,  $\text{CDCl}_3$ ):  $\delta$  166.2, 155.6, 142.7, 131.3, 129.8, 129.0, 128.9, 126.7, 120.5, 59.9, 20.1, 14.2; HRMS (ESI<sup>+</sup>): Calcd for  $\text{C}_{12}\text{H}_{14}\text{ClO}_2$  [M+H]<sup>+</sup>: 225.06823, Found: 225.06795.

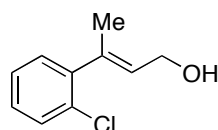

**(E)-3-(2-Chlorophenyl)but-2-en-1-ol:** IR (neat): 3311 (br, w), 3064 (w), 2918 (w), 2871 (w), 1657 (w), 1592 (w), 1564 (w), 1470 (w), 1428 (w), 1376 (w), 1286 (w), 1265 (w), 1248 (w), 1213 (w), 1127 (w), 1112 (w), 1074 (w), 1044 (w), 999 (m), 943 (w), 750 (s), 730 (w), 680 (m), 606 (w), 554 (w), 455 (w), 429 (w)  $\text{cm}^{-1}$ ;  $^1\text{H}$  NMR (400 MHz,  $\text{CDCl}_3$ ):  $\delta$  7.36-7.34 (1H, m), 7.22-7.17 (3H, m), 5.65-5.61 (1H, m), 4.35 (2H, t,  $J = 5.9$  Hz), 2.04-2.03 (3H, m), 1.33-1.31 (1H, m);  $^{13}\text{C}$  NMR (100 MHz,  $\text{CDCl}_3$ ):  $\delta$  143.4, 137.9, 132.0, 129.8, 129.5, 128.2, 126.7, 59.4, 17.6; HRMS (ESI<sup>+</sup>): Calcd for  $\text{C}_{10}\text{H}_{15}\text{ClO}$  [M+ $\text{NH}_4$ ]<sup>+</sup>: 200.08422, Found: 200.08377.

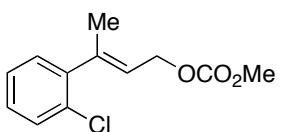

**(E)-3-(2-Chlorophenyl)but-2-en-1-yl methyl carbonate:** IR (neat): 2957 (w), 1744 (s), 1662 (w), 1591 (w), 1565 (w), 1471 (w), 1441 (m), 1378 (w), 1331 (w), 1252 (s), 1128 (w), 1076 (w), 1044 (w), 999 (w), 943



(s), 905 (w), 850 (w), 791 (m), 753 (s), 732 (w), 712 (w), 678 (w), 611 (w), 562 (w), 466 (w)  $\text{cm}^{-1}$ ;  $^1\text{H}$  NMR (400 MHz,  $\text{CDCl}_3$ ):  $\delta$  7.36-7.33 (1H, m), 7.22-7.16 (3H, m), 5.62-5.57 (1H, m), 4.83 (2H, dd,  $J = 6.8, 0.8$  Hz), 3.81 (3H, s), 2.07-2.08 (3H, m);  $^{13}\text{C}$  NMR (100 MHz,  $\text{CDCl}_3$ ):  $\delta$  155.8, 142.9, 141.0, 131.9, 129.7, 129.6, 128.4, 126.7, 123.9, 64.4, 54.8, 17.8; HRMS (ESI+): Calcd for  $\text{C}_{10}\text{H}_{10}\text{Cl}$   $[\text{M}-\text{OCO}_2\text{Me}]^+$ : 165.04710, Found: 165.04712.

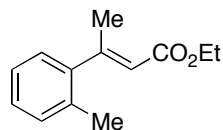

**(E)-Ethyl 3-(o-tolyl)but-2-enoate:** IR (neat): 2980 (w), 1712 (s), 1639 (m), 1601 (w), 1485 (w), 1446 (w), 1366 (w), 1338 (w), 1290 (w), 1262 (m), 1197 (w), 1158 (s), 1122 (w), 1095 (w), 1072 (w), 1041 (m), 942 (w), 876 (m), 811 (w), 760 (m), 726 (m), 601 (w), 578 (w), 556 (w), 512 (w), 455 (m)  $\text{cm}^{-1}$ ;  $^1\text{H}$  NMR (400 MHz,  $\text{CDCl}_3$ ):  $\delta$  7.22-7.15 (3H, m), 7.08-7.06 (1H, m), 5.76 (1H, q,  $J = 1.4$  Hz), 4.22 (2H, q,  $J = 7.2$  Hz), 2.44 (3H, d,  $J = 1.4$  Hz), 2.29 (3H, s), 1.31 (3H, t,  $J = 7.2$  Hz);  $^{13}\text{C}$  NMR (100 MHz,  $\text{CDCl}_3$ ):  $\delta$  166.5, 158.1, 143.8, 133.7, 130.3, 127.5, 126.9, 125.6, 119.3, 59.7, 20.7, 19.6, 14.2; HRMS (ESI+): Calcd for  $\text{C}_{13}\text{H}_{17}\text{O}_2$   $[\text{M}+\text{H}]^+$ : 205.12285, Found: 205.12373.

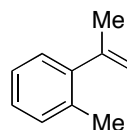

**(E)-3-(o-Tolyl)but-2-en-1-ol:** IR (neat): 3316 (br, w), 3059 (w), 3015 (w), 2920 (w), 2869 (w), 1658 (w), 1486 (w), 1439 (w), 1377 (w), 1306 (w), 1215 (w), 1098 (w), 1064 (w), 996 (s), 940 (w), 852 (w), 801 (w), 756 (s), 727 (s), 613 (w), 565 (w), 517 (w), 451 (w)  $\text{cm}^{-1}$ ;  $^1\text{H}$  NMR (400 MHz,  $\text{CDCl}_3$ ):  $\delta$  7.18-7.12 (3H, m), 7.09-7.06 (1H, m), 5.56-5.52 (1H, m), 4.34 (2H, t,  $J = 5.9$  Hz), 2.28 (3H, s), 1.98-1.97 (3H, m), 1.30-1.27 (1H, m);  $^{13}\text{C}$  NMR (100 MHz,  $\text{CDCl}_3$ ):  $\delta$  144.5, 139.4, 134.4, 130.0, 128.0, 127.9, 126.8, 125.5, 59.4, 19.6, 18.1; HRMS (ESI+): Calcd for  $\text{C}_{11}\text{H}_{13}$   $[\text{M}-\text{OH}]^+$ : 145.10173, Found: 145.10201.

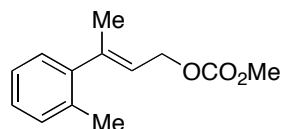

**(E)-Methyl (3-(o-tolyl)but-2-en-1-yl) carbonate:** IR (neat): 2956 (w), 1744 (s), 1661 (w), 1588 (w), 1486 (w), 1441 (m), 1377 (w), 1328 (w), 1252 (s), 1113 (w), 1046 (w), 998 (w), 941 (s), 904 (w), 852 (w), 791 (m), 759 (s), 728 (m), 564 (w), 516 (w), 460 (m)  $\text{cm}^{-1}$ ;  $^1\text{H}$  NMR (400 MHz,  $\text{CDCl}_3$ ):  $\delta$  7.18-7.12 (3H, m), 7.08-7.05 (1H, m), 5.52-5.47 (1H, m), 4.82 (2H, dd,  $J = 7.0, 0.6$  Hz), 3.80 (3H, s), 2.27 (3H, s), 2.02-2.01 (3H, m);  $^{13}\text{C}$  NMR (100 MHz,  $\text{CDCl}_3$ ):  $\delta$  155.8, 144.1, 142.9, 134.4, 130.1, 127.8, 127.0, 125.6, 122.4, 64.6, 54.7, 19.6, 18.4; HRMS (ESI+): Calcd for  $\text{C}_{11}\text{H}_{13}$   $[\text{M}-\text{OCO}_2\text{Me}]^+$ : 145.10173, Found: 145.10187.

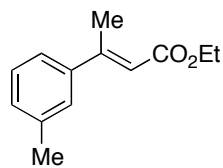

**(E)-Ethyl-3-(m-tolyl)but-2-enoate:** IR (neat): 2979 (w), 1710 (s), 1627 (m), 1605 (w), 1584 (w), 1444 (w), 1366 (w), 1340 (w), 1283 (w), 1199 (m), 1155 (s), 1096 (w), 1043 (m), 1000 (w), 870 (w), 786 (m), 747 (w), 696 (w), 581 (w), 449 (w)  $\text{cm}^{-1}$ ;  $^1\text{H}$  NMR (400 MHz,  $\text{CDCl}_3$ ):  $\delta$  7.29-7.24 (3H, m), 7.19-7.16 (1H, m), 6.12 (1H, q,  $J = 1.4$  Hz), 4.22 (2H, q,  $J = 7.2$  Hz), 2.57 (3H, d,  $J = 1.4$  Hz), 2.38 (3H, s), 1.32 (3H, t,  $J = 7.1$  Hz);  $^{13}\text{C}$  NMR (100 MHz,  $\text{CDCl}_3$ ):  $\delta$  166.9, 155.7, 142.2, 138.1, 129.7, 128.3,

127.0, 123.4, 116.9, 59.8, 21.4, 17.9, 14.3; HRMS (ESI+): Calcd for C<sub>13</sub>H<sub>17</sub>O<sub>2</sub> [M+H]<sup>+</sup>: 205.12285, Found: 205.12314.

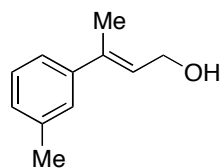

**(E)-3-(m-Tolyl)but-2-en-1-ol:** IR (neat): 3318 (br. w), 3028 (w), 2919 (w), 2861 (w), 1646 (w), 1603 (w), 1582 (w), 1486 (w), 1441 (w), 1377 (w), 1282 (w), 1222 (w), 1189 (w), 1171 (w), 1100 (w), 1066 (w), 993 (s), 904 (w), 878 (w), 776 (s), 697 (s), 613 (w), 582 (w), 533 (w), 441 (w) cm<sup>-1</sup>; <sup>1</sup>H NMR (400 MHz, CDCl<sub>3</sub>): δ 7.23-7.21 (3H, m), 7.10-7.07 (1H, m), 5.99-5.94 (1H, m), 4.36 (2H, t, *J* = 5.9 Hz), 2.36 (3H, s), 2.08-2.07 (3H, m), 1.30 (1H, t, *J* = 5.5 Hz); <sup>13</sup>C NMR (100 MHz, CDCl<sub>3</sub>): δ 142.8, 137.8, 137.7, 128.1, 127.9, 126.5, 126.3, 122.8, 59.8, 21.4, 16.0; HRMS (ESI+): Calcd for C<sub>11</sub>H<sub>13</sub> [M-OH]<sup>+</sup>: 145.10173, Found: 145.10243.

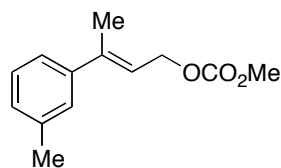

**(E)-Methyl (3-(m-tolyl)but-2-en-1-yl) carbonate:** IR (neat): 2956 (w), 1743 (s), 1647 (w), 1603 (w), 1583 (w), 1441 (m), 1376 (w), 1332 (w), 1251 (s), 1173 (w), 1125 (w), 941 (s), 903 (w), 833 (w), 779 (s), 698 (m), 584 (w), 536 (w), 453 (w) cm<sup>-1</sup>; <sup>1</sup>H NMR (400 MHz, CDCl<sub>3</sub>): δ 7.24-7.19 (3H, m), 7.11-7.09 (1H, m), 5.93-5.88 (1H, m), 4.84 (2H, dd, *J* = 7.0, 0.6 Hz), 3.80 (3H, s), 2.36 (3H, s), 2.12 (3H, s); <sup>13</sup>C NMR (100 MHz, CDCl<sub>3</sub>): δ 155.8, 142.4, 141.1, 137.8, 128.3, 128.2, 126.6, 123.0, 120.4, 64.9, 54.7, 21.4, 16.3; HRMS (ESI+): Calcd for C<sub>11</sub>H<sub>13</sub> [M-OCO<sub>2</sub>Me]<sup>+</sup>: 145.10173, Found: 145.10203.

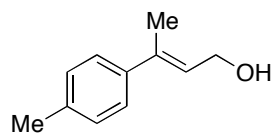

**(E)-3-(p-Tolyl)but-2-en-1-ol:** IR (neat): 3316 (br. w), 3085 (w), 3024 (w), 2920 (w), 2864 (w), 1645 (w), 1512 (m), 1441 (w), 1409 (w), 1377 (w), 1312 (w), 1275 (w), 1216 (w), 1189 (w), 1112 (w), 1064 (w), 994 (s), 925 (w), 808 (s), 717 (w), 699 (w), 642 (w), 547 (m), 512 (w), 458 (w), 407 (w) cm<sup>-1</sup>; <sup>1</sup>H NMR (400 MHz, CDCl<sub>3</sub>): δ 7.33-7.30 (2H, m), 7.16-7.13 (2H, m), 5.98-5.94 (1H, m), 4.36 (2H, t, *J* = 5.9 Hz), 2.35 (3H, s), 2.08-2.07 (3H, m), 1.32-1.29 (1H, m); <sup>13</sup>C NMR (100 MHz, CDCl<sub>3</sub>): δ 139.9, 137.6, 137.0, 128.9, 125.6, 59.9, 21.0, 15.9; HRMS (ESI+): Calcd for C<sub>11</sub>H<sub>13</sub> [M-OH]<sup>+</sup>: 145.10173, Found: 145.10189.

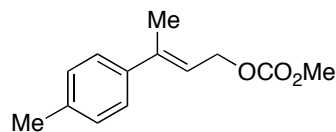

**(E)-Methyl (3-(p-tolyl)but-2-en-1-yl) carbonate:** IR (neat): 2956 (w), 1747 (s), 1514 (w), 1443 (m), 1378 (w), 1333 (w), 1261 (s), 1128 (w), 943 (m), 904 (w), 812 (w), 792 (w) cm<sup>-1</sup>; <sup>1</sup>H NMR (400 MHz, CDCl<sub>3</sub>): δ 7.32-7.29 (2H, m), 7.13 (2H, d, *J* = 8.0 Hz), 5.93-5.88 (1H, m), 4.84 (2H, d, *J* = 7.0 Hz), 3.80 (3H, s), 2.35 (3H, s), 2.11 (3H, s); <sup>13</sup>C NMR (100 MHz, CDCl<sub>3</sub>): δ 155.8, 140.9, 139.5, 137.4, 129.0, 125.7, 119.7, 65.0, 54.7, 21.0, 16.2; HRMS (ESI+): Calcd for C<sub>13</sub>H<sub>16</sub>O<sub>3</sub> [M]<sup>+</sup>: 220.10994, Found: 220.10914.

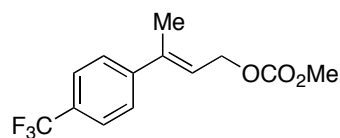**(E)-Methyl (3-(4-(trifluoromethyl)phenyl)but-2-en-1-yl) carbonate:**

IR (neat): 2959 (w), 1746 (s), 1617 (w), 1444 (m), 1412 (w), 1379 (w), 1323 (s), 1257 (s), 1195 (w), 1164 (m), 1113 (s), 1073 (m), 1059 (m), 1014 (m), 944 (m), 906 (w), 829 (m), 791 (m), 727 (w), 631 (w), 604 (m), 540 (w), 509 (w)  $\text{cm}^{-1}$ ;  $^1\text{H}$  NMR (400 MHz,  $\text{CDCl}_3$ ):  $\delta$  7.58 (2H, d,  $J = 8.4$  Hz), 7.49 (2H, d,  $J = 8.4$  Hz), 5.99-5.95 (1H, m), 4.86 (2H, d,  $J = 6.8$  Hz), 3.81 (3H, s), 2.14 (3H, d,  $J = 0.8$  Hz);  $^{13}\text{C}$  NMR (100 MHz,  $\text{CDCl}_3$ ):  $\delta$  155.8, 145.9, 139.6, 129.7, 129.4, 126.1, 125.5, 125.3, 125.2, 122.7, 64.6, 54.8, 16.2; HRMS (ESI+): Calcd for  $\text{C}_{11}\text{H}_{10}\text{F}_3$   $[\text{M}-\text{OCO}_2\text{Me}]^+$ : 199.07346, Found: 199.07287.

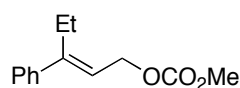**(E)-Methyl (3-phenylpent-2-en-1-yl) carbonate (12):**

IR (neat): 2967 (w), 2875 (w), 1743 (s), 1644 (w), 1598 (w), 1492 (w), 1442 (m), 1376 (w), 1346 (w), 1306 (w), 1251 (s), 1128 (w), 1065 (w), 1031 (w), 937 (m), 904 (m), 852 (w), 791 (m), 760 (s), 696 (s), 514 (w), 445 (w)  $\text{cm}^{-1}$ ;  $^1\text{H}$  NMR (400 MHz,  $\text{CDCl}_3$ ):  $\delta$  7.38-7.27 (5H, m), 5.79 (1H, t,  $J = 7.0$  Hz), 4.85 (2H, d,  $J = 7.0$  Hz), 3.80 (3H, s), 2.59 (2H, q,  $J = 7.5$  Hz), 1.00 (3H, t,  $J = 7.5$  Hz);  $^{13}\text{C}$  NMR (100 MHz,  $\text{CDCl}_3$ ):  $\delta$  155.8, 147.9, 141.4, 128.3, 127.5, 126.5, 120.3, 64.7, 54.7, 23.4, 13.7; HRMS (ESI+): Calcd for  $\text{C}_{11}\text{H}_{13}$   $[\text{M}-\text{OCO}_2\text{Me}]^+$ : 145.10173, Found: 145.10203.

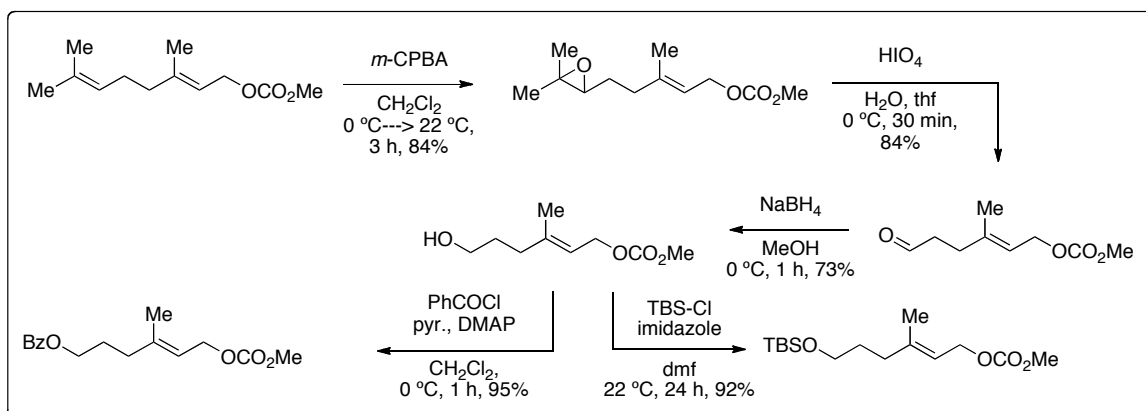

**Preparation of ether-containing substrates:** Allylic carbonate **12** was converted to the corresponding ether-containing allylic carbonates based on previously established methods.<sup>9</sup>

**(E)-5-(3,3-Dimethyloxiran-2-yl)-3-methylpent-2-en-1-yl methyl carbonate:**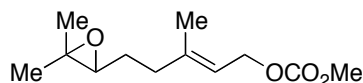

Chloroperbenzoic acid (1.7 g, 10 mmol) was added to a solution of (*E*)-3,7-dimethylocta-2,6-dien-1-yl methyl carbonate (2.1 g, 10 mmol) in  $\text{CH}_2\text{Cl}_2$  (70 mL) at 0 °C. The mixture was allowed to warm to 22 °C and stir for 4 hours. Calcium hydroxide (2.8 g, 37 mmol) was added and the reaction was allowed to stir for 40 min. The reaction was filtered, eluting with  $\text{Et}_2\text{O}$ , and

(9) Tago, K; Arai, M.; Kogen, H. *J. Chem. Soc., Perkin Trans. 1* **2000**, 2073–2078.

concentrated in vacuo to provide a yellow oil. The resulting residue was purified by silica gel column chromatography (gradient 10% to 12% Et<sub>2</sub>O in hexanes) to afford the desired compound as clear oil (1.9 g, 8.4 mmol, 84%). IR (neat): 2959 (br, w), 1744 (s), 1670 (w), 1442 (m), 1378 (w), 1340 (w), 1252 (s), 1121 (w), 1049 (m), 936 (m), 903 (w), 874 (w), 792 (m), 737 (w), 679 (w) cm<sup>-1</sup>; <sup>1</sup>H NMR (400 MHz, CDCl<sub>3</sub>): δ 5.44-5.40 (1H, m), 4.66 (2H, d, *J* = 7.2 Hz), 3.77 (3H, s), 2.70 (1H, t, *J* = 6.4 Hz), 2.27-2.11 (2H, m), 1.74 (3H, s), 1.69-1.63 (2H, m), 1.30 (3H, s), 1.26 (3H, s); <sup>13</sup>C NMR (100 MHz, CDCl<sub>3</sub>): δ 155.8, 142.2, 118.3, 65.8, 64.5, 63.8, 58.3, 54.6, 36.1, 27.0, 24.8, 18.7, 16.5, 15.2; HRMS (ESI+): Calcd for C<sub>12</sub>H<sub>24</sub>NO<sub>4</sub> [M+NH<sub>4</sub>]<sup>+</sup>: 246.1705, Found: 246.1711.

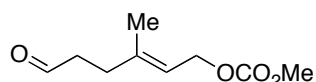

**(E)-Methyl (3-methyl-6-oxohex-2-en-1-yl) carbonate:** A solution of HIO<sub>4</sub>•2H<sub>2</sub>O (1.9 g, 8.5 mmol) in water (8 mL) was slowly added to a solution of the epoxide (1.8 g, 7.7 mmol) in THF (13 mL) at 0 °C. The reaction was allowed to stir for 30 min. Brine (15 mL) was added to the reaction and the solution was extracted with Et<sub>2</sub>O (10 mL x 3). The combined organic layers were washed with a saturated solution of NaHCO<sub>3</sub> (15 mL x 2), and brine (15 mL x 2). The organic layer was separated, dried over Na<sub>2</sub>SO<sub>4</sub>, filtered, and concentrated in vacuo. The resulting residue was purified by silica gel chromatography (10%→30% Et<sub>2</sub>O in hexanes) to provide the product as clear oil (1.2 g, 6.44 mmol, 84%). IR (neat): 2958 (br, w), 2857 (br, w), 2724 (w), 1742 (s), 1721 (m), 1672 (w), 1442 (m), 1386 (w), 1340 (w), 1251 (s), 1120 (w), 1065 (w), 933 (m), 904 (w), 791 (m) cm<sup>-1</sup>; <sup>1</sup>H NMR (400 MHz, CDCl<sub>3</sub>): δ 9.76 (1H, t, *J* = 1.6 Hz), 5.40-5.36 (1H, m), 4.64 (2H, dd, *J* = 7.2, 0.8 Hz), 3.77 (3H, s), 2.59-2.55 (2H, m), 2.37 (2H, t, *J* = 7.4 Hz), 1.73 (3H, s); <sup>13</sup>C NMR (100 MHz, CDCl<sub>3</sub>): δ 201.5, 155.7, 141.0, 118.7, 64.3, 62.4, 54.7, 41.6, 31.3, 16.6; HRMS (ESI+): Calcd for C<sub>9</sub>H<sub>18</sub>NO<sub>4</sub> [M+NH<sub>4</sub>]<sup>+</sup>: 204.1236, Found: 204.1245.

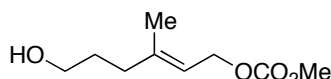

**(E)-6-Hydroxy-3-methylhex-2-en-1-yl methyl carbonate:** Sodium Borohydrate (0.19 g, 5.4 mmol) was added to a solution of aldehyde (1.0 g, 5.4 mmol) in methanol (60 mL) at 0 °C. The mixture was allowed to stir for one hour at 0 °C. Acetone (10 mL) and water (30 mL) were added and the reaction was allowed to warm to 22 °C and washed with Et<sub>2</sub>O (30 mL x 3). The combined organic layers were combined and washed with HCl (0.1 M aqueous solution, 25 mL x 2) and brine (25 mL x 2). The organic layer was separated, dried over Na<sub>2</sub>SO<sub>4</sub>, filtered, and concentrated under vacuo. The product was purified by silica gel chromatography with Et<sub>2</sub>O/hexanes (1:1), to provide the product as clear oil (0.73 g, 3.9 mmol, 73%). IR (neat): 2942 (br), 2870 (br), 1743 (s), 1670 (w), 1442 (m), 1382 (w), 1339 (w), 1252 (s), 1120 (w), 1058 (m), 1006 (w), 932 (m), 904 (w), 792 (m) cm<sup>-1</sup>; <sup>1</sup>H NMR (400 MHz, CDCl<sub>3</sub>): δ 5.42-5.38 (1H, m), 4.65 (2H, d, *J* = 7.2 Hz), 3.77 (3H, s), 3.65-3.61 (2H, m), 2.12 (2H, t, *J* = 7.8 Hz), 1.73 (3H, s), 1.71-1.66 (2H, m), 1.36 (1H, s); <sup>13</sup>C NMR (100 MHz, CDCl<sub>3</sub>): δ 155.8, 142.8, 118.0, 64.6, 62.4, 54.7, 35.7, 30.4, 16.4; HRMS (ESI+): Calcd for C<sub>9</sub>H<sub>20</sub>NO<sub>4</sub> [M+NH<sub>4</sub>]<sup>+</sup>: 206.1392, Found: 206.1396.

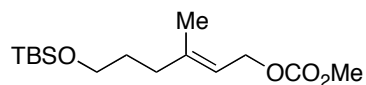**(E)-6-((tert-Butyldimethylsilyl)oxy)-3-methylhex-2-en-1-yl**

**methyl carbonate:** *t*-Butyldimethylsilyl chloride (280 mg, 1.80 mmol) was added to a solution of the alcohol (300 mg, 1.60 mmol) and imidazole (440 mg, 6.40 mmol) in DMF (20 mL) at 22 °C. The mixture was allowed to stir for 24 h. Water (20 mL) was added and washed with Et<sub>2</sub>O (20 mL x 3). The combined organic layers were washed with water (25 mL x 2) and brine (25 mL x 2), dried over Na<sub>2</sub>SO<sub>4</sub>, filtered, and concentrated under vacuo. The product was purified by silica gel column chromatography (5% Et<sub>2</sub>O in hexanes) to provide the product as clear yellow oil (445 mg, 1.47 mmol, 92%). IR (neat): 2953 (w), 2930 (w), 2890 (w), 2857 (w), 1747 (s), 1671 (w), 1442 (m), 1385 (w), 1361 (w), 1338 (w), 1252 (s), 1096 (m), 1006 (w), 939 (m), 904 (w), 833 (m), 792 (w), 774 (m), 714 (w), 662 (w) cm<sup>-1</sup>; <sup>1</sup>H NMR (400 MHz, CDCl<sub>3</sub>): δ 5.42-5.38 (1H, m), 4.65 (2H, dd, *J* = 7.2, 0.6 Hz), 3.77 (3H, s), 3.59 (2H, t, *J* = 6.5 Hz), 2.08 (2H, t, *J* = 7.8 Hz), 1.72 (3H, s), 1.67-1.60 (2H, m), 0.90 (9H, s), 0.04 (6H, s); <sup>13</sup>C NMR (100 MHz, CDCl<sub>3</sub>): δ 155.9, 143.1, 117.7, 64.7, 62.6, 54.6, 35.7, 30.7, 25.9, 18.3, 16.5, -5.3; HRMS (ESI<sup>+</sup>): Calcd for C<sub>15</sub>H<sub>34</sub>NO<sub>4</sub>Si [M+NH<sub>4</sub>]<sup>+</sup>: 320.2257, Found: 320.2249.

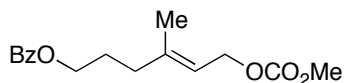**(E)-6-((Methoxycarbonyl)oxy)-4-methylhex-4-en-1-yl benzoate:**

Benzoyl chloride (170 μL, 1.50 mmol) was added to a solution of alcohol (200 mg, 1.10 mmol), pyridine (450 μL, 5.50 mmol), and *N,N*-dimethylaminopyridine (8.0 mg, 70.0 μmol) in CH<sub>2</sub>Cl<sub>2</sub> (3 mL) at 0 °C. The mixture was allowed to stir for 1 hour at 0 °C. Water (10 mL) was added and the solution was allowed to warm to 22 °C, and washed with Et<sub>2</sub>O (10 mL x 3). The combined organic layers were washed with brine (15 mL x 2), dried over Na<sub>2</sub>SO<sub>4</sub>, filtered, and concentrated under vacuo. The residue was purified by silica gel chromatography (6%→12% Et<sub>2</sub>O in hexanes) to provide the product as clear yellow oil (310 mg, 1.06 mmol, 95%). IR (neat): 2956 (b), 1744 (s), 1716 (s), 1602 (w), 1584 (w), 1442 (m), 1383 (w), 1338 (w), 1314 (w), 1251 (s), 1175 (w), 1111 (m), 1070 (w), 1026 (w), 935 (m), 904 (w), 852 (w), 792 (w), 710 (s) 688 (w), 675 (w) cm<sup>-1</sup>; <sup>1</sup>H NMR (400 MHz, CDCl<sub>3</sub>): δ 8.05-8.02 (2H, m), 7.58-7.53 (1H, m), 7.46-7.42 (2H, m), 5.46-5.41 (1H, m), 4.65 (2H, dd, *J* = 7.0, 0.6 Hz), 4.31 (2H, t, *J* = 6.5 Hz), 3.77 (3H, s), 2.21 (2H, t, *J* = 8.2, 6.8 Hz), 1.95-1.88 (2H, m), 1.76 (3H, s); <sup>13</sup>C NMR (100 MHz, CDCl<sub>3</sub>): δ 166.5, 155.8, 142.0, 132.9, 130.3, 129.5, 128.3, 118.5, 64.5, 64.3, 54.7, 35.8, 26.6, 16.4; HRMS (ESI<sup>+</sup>): Calcd for C<sub>16</sub>H<sub>24</sub>NO<sub>5</sub> [M+NH<sub>4</sub>]<sup>+</sup>: 310.1655, Found: 310.1659.

**Representative experimental procedure for enantioselective Cu-catalyzed substitution reaction of (E)-methyl(3-methyl-5-phenylpent-2-en-1-yl)carbonate with bis(pinacolato) diboron:**

**(R)-3-Methyl-5-phenylpent-1-en-3-ol:** In an N<sub>2</sub>-filled glove-box, an oven-dried vial (4 mL, 17 x 38 mm) with magnetic stir bar was charged with imidazolium salt **4a** (6.0 mg, 0.012 mmol, 6.0 mol %), Cu(OTf)<sub>2</sub> (3.7 mg, 0.010 mmol, 5.0 mol %), NaOMe (8.8 mg, 0.16 mmol, 80 mol %) and DME (1.0 mL) under a N<sub>2</sub> atmosphere. The vessel was sealed with a cap (phenolic open top cap with red PTFE/white silicone) and the green solution was allowed to stir for 30

min. The color of the solution was then clear blue. Bis(pinacolato)diboron (102 mg, 0.400 mmol, 2.0 equiv) was added to the solution. The color of the solution immediately turned dark brown. The vial was resealed with a cap (phenolic open top cap with red PTFE/white silicone). After 30 min, (*E*)-methyl(3-methyl-5-phenylpent-2-en-1-yl)carbonate (46.9 mg, 0.200 mmol, 1.0 equiv) was added neat by syringe. After 24 h, the solution was quenched by passing through a short plug of celite and silica gel and washed with (reagent grade) thf (3 x 2 mL). The filtrate was allowed to cool to at 0 °C (ice bath) and H<sub>2</sub>O<sub>2</sub> (217 μL, 2.23 mmol) and 2 N NaOH (0.500 mL, 1.00 mmol) were added. The resulting solution was allowed to stir for 1 hour. After this time, the mixture was diluted with water (3 mL), washed with Et<sub>2</sub>O (3 x 1 mL) and filtered through a plug of MgSO<sub>4</sub> and silica gel. The filtrate was concentrated in vacuo to provide colorless oil, which was purified by silica gel chromatography (5%→15% Et<sub>2</sub>O in hexanes) to afford the allylic alcohol, (*R*)-3-methyl-5-phenylpent-1-en-3-ol, as colorless oil (33.8 mg, 0.192 mmol, 96% yield).

**(*R*)-5-Phenylpent-1-en-3-ol (*R*-9):** This product isolated as colorless oil. <sup>1</sup>H NMR (400 MHz, CDCl<sub>3</sub>): δ 7.31–7.36 (m, 2H), 7.22–7.17 (m, 2H), 5.95–5.87 (1H, ddd, *J* = 16.6, 10.4, 6.1 Hz), 5.28–5.23 (1H, m), 5.16–5.13 (1H, m), 4.13 (1H, q, *J* = 6.5 Hz), 2.75–2.66 (2H, m), 1.89–1.83 (2H, m), 1.58 (1H, s). Optical rotation: [α]<sub>D</sub><sup>20</sup> –5.8 (*c* 1.0, CHCl<sub>3</sub>) for a sample with 95:5 er. The spectroscopic data match those reported previously.<sup>10</sup> Enantiomeric purity was determined by GLC analysis in comparison with authentic racemic material (95:5 er shown below; CDB/DM, 15 psi, 100 °C; the GC trace was taken with the *R* enantiomer of product prepared by using the *R* enantiomer of ligand).

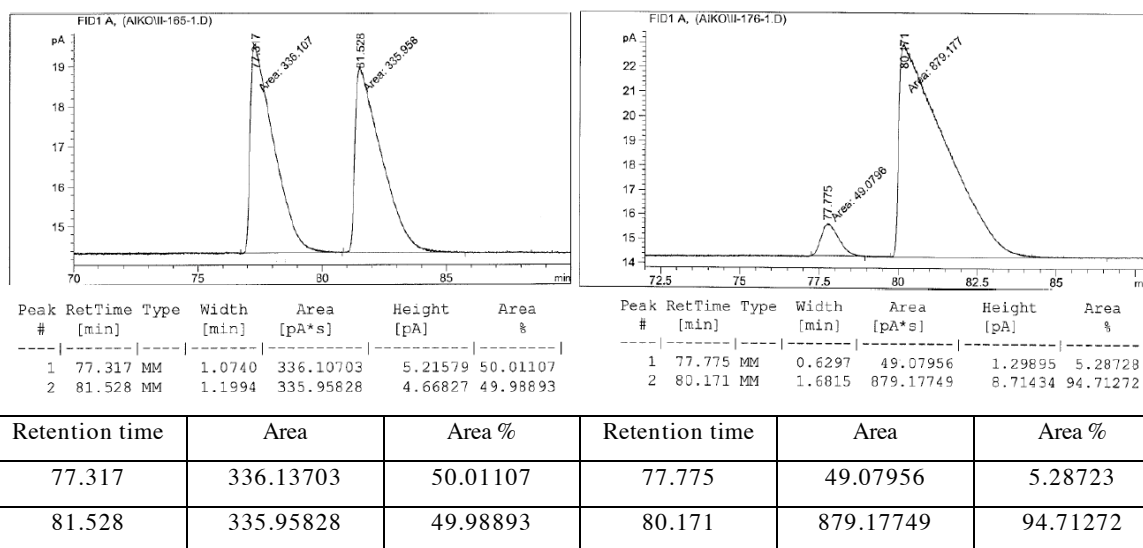

■ **Proof of Stereochemistry:** Literature value ([α]<sub>D</sub><sup>21</sup> +4.96 is assigned for the (*S*) enantiomer<sup>10a</sup> and ([α]<sub>D</sub><sup>21</sup> –5.8 (*c* 1.3, CHCl<sub>3</sub>) is assigned for the (*R*) enantiomer.<sup>10b</sup>

(10) (a) Discordia, R. P.; Dittmer, D. C. *J. Org. Chem.* **1990**, *55*, 1414–1415. (b) Sato, I.; Asakura, N.; Iwashita, T. *Tetrahedron: Asym.* **2007**, *18*, 2638–2642.

**(S)-5-Phenylpent-1-en-3-ol (S-9):** prepared from **Z-8**. Optical rotation:  $[\alpha]_D^{20} +5.8$  ( $c$  1.0,  $\text{CHCl}_3$ ) for a sample with 95:5 er. Enantiomeric purity was determined by GLC analysis in comparison with authentic racemic material (95:5 er shown below; CDB/DM, 15 psi, 100 °C; the chiral GC trace was taken with the *S* enantiomer of product prepared by using the *R* enantiomer of ligand).

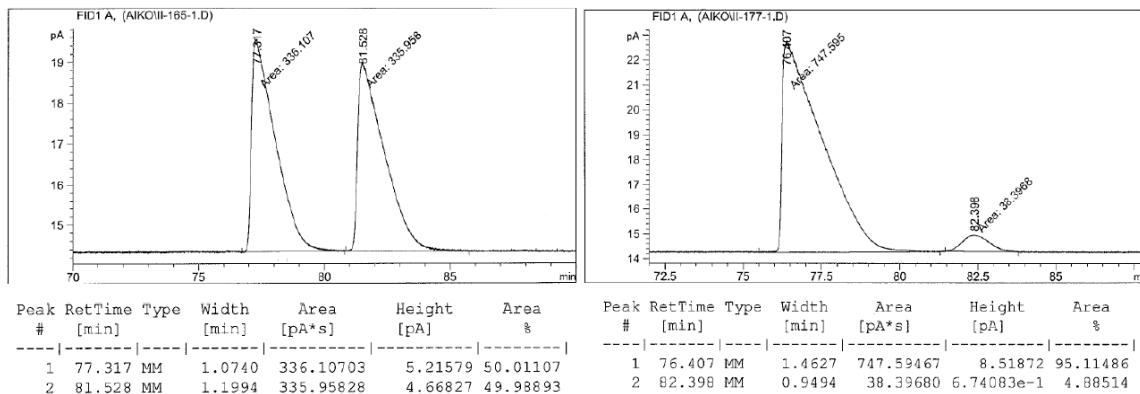

| Retention time | Area      | Area %   | Retention time | Area      | Area %   |
|----------------|-----------|----------|----------------|-----------|----------|
| 77.317         | 336.13703 | 50.01107 | 76.407         | 747.59467 | 95.11486 |
| 81.528         | 335.95828 | 49.98893 | 82.398         | 38.39680  | 4.88514  |

**(R)-1-Cyclohexylbut-3-en-2-ol (10):** IR (neat): 3332 (b), 3077 (w), 2920 (s), 2851 (m), 1644 (w), 1447 (w), 1425 (w), 1321 (w), 1262 (w), 1201 (m), 1148 (w), 1103 (w), 1080 (w), 1060 (w), 1043 (w), 1016 (w), 989 (m), 964 (w), 917 (m), 896 (w), 878 (w), 825 (w), 687 (w)  $\text{cm}^{-1}$ ;  $^1\text{H}$  NMR (400 MHz,  $\text{CDCl}_3$ ):  $\delta$  5.86 (1H, ddd,  $J = 17.2, 10.4, 6.26$  Hz), 5.22 (1H, dt,  $J = 17.2, 1.4$  Hz), 5.08 (1H, dt,  $J = 10.4, 1.4$  Hz), 4.20 (1H, q,  $J = 6.5$  Hz), 1.81-1.62 (5H, m), 1.48-1.10 (7H, m), 0.99-0.86 (2H, m);  $^{13}\text{C}$  NMR (100 MHz,  $\text{CDCl}_3$ ):  $\delta$  141.8, 114.3, 70.8, 44.9, 33.9, 33.8, 33.1, 26.5, 26.3, 26.2; HRMS (ESI+): Calcd for  $\text{C}_{10}\text{H}_{22}\text{NO}$   $[\text{M}+\text{NH}_4]^+$ : 172.17014, Found: 172.17043.  $[\alpha]_D^{20} +5.4$  ( $c = 1.0, \text{CHCl}_3$ ) for an enantiomerically enriched sample of 91.5:8.5 er. Enantiomeric purity was determined by GLC analysis in comparison with authentic racemic material (91.5:8.5 er shown; CDB/DM column, 15 psi, 100 °C; the chiral GC trace was taken with the *R* enantiomer of product prepared by using the *R* enantiomer of ligand).

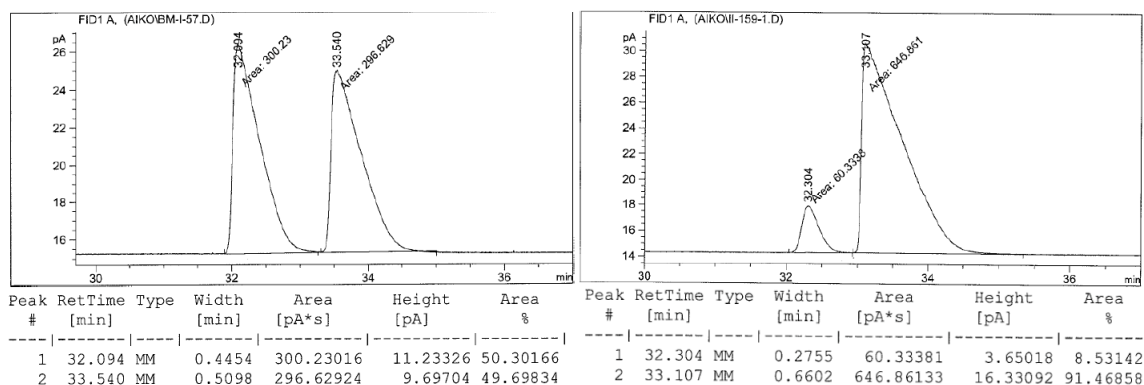

| Retention time | Area      | Area %   | Retention time | Area      | Area %   |
|----------------|-----------|----------|----------------|-----------|----------|
| 32.094         | 300.23016 | 50.30166 | 32.304         | 60.33381  | 8.53142  |
| 33.540         | 296.62924 | 49.69834 | 33.107         | 646.86133 | 91.46858 |

**(S)-1-Cyclohexylprop-2-en-1-ol (11):** IR (neat): 3353 (br, m), 3076 (w), 2921 (s), 2851 (m), 1644 (w), 1449 (m), 1424 (w), 1307 (w), 1260 (w), 1232 (w), 1213 (w), 1184 (w), 1145 (w), 1094 (w), 1081 (w), 1051 (w), 1017 (m), 990 (m), 973 (m), 918 (s), 891 (m), 862 (w), 840 (w), 779 (w), 728 (w), 690 (w), 617 (w)  $\text{cm}^{-1}$ ;  $^1\text{H}$  NMR (400 MHz,  $\text{CDCl}_3$ ):  $\delta$  5.86 (1H, ddd,  $J = 17.2, 10.4, 6.6$  Hz), 5.21 (1H, dt,  $J = 17.2, 1.4$  Hz), 5.14 (1H, dt,  $J = 10.4, 1.2$  Hz), 3.85 (1H, t,  $J = 6.4$  Hz), 1.80-1.62 (5H, m), 1.48-1.36 (2H, m), 1.29-0.95 (5H, m);  $^{13}\text{C}$  NMR (100 MHz,  $\text{CDCl}_3$ ):  $\delta$  139.8, 115.5, 77.8, 43.5, 28.7, 28.2, 26.5, 26.13, 26.06; HRMS (ESI+): Calcd for  $\text{C}_9\text{H}_{20}\text{NO}$   $[\text{M}+\text{NH}_4]^+$ : 158.15449, Found: 158.15489.  $[\alpha]_D^{20} +13.4$  ( $c = 1.00, \text{CHCl}_3$ ) for an enantiomerically enriched sample of 97:3 er. Enantiomeric purity was determined by GLC analysis in comparison with authentic racemic material (97:3 er shown;  $\alpha$ -dex column, 15 psi, 70  $^\circ\text{C}$ ; the GC trace was taken with the *S*-enantiomer of product prepared by using the *R* enantiomer of ligand).

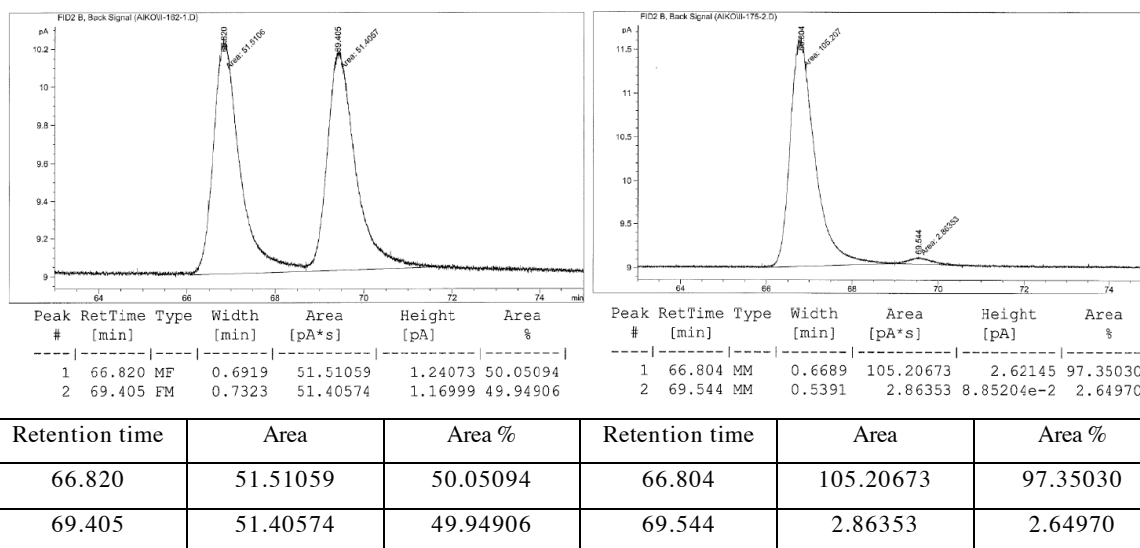

**(-)-Linalool (Table 2, entry 1 and 2):**  $^1\text{H}$  NMR (400 MHz,  $\text{CDCl}_3$ ):  $\delta$  5.91 (1H, dd,  $J = 17.4, 10.8$  Hz), 5.22 (1H, dd,  $J = 17.4, 1.4$  Hz), 5.14-5.10 (1H, m), 5.06 (1H, dd,  $J = 10.8, 1.2$  Hz), 2.10-1.95 (2H, m), 1.68 (3H, d,  $J = 1.2$  Hz), 1.60-1.53 (6H, m), 1.28 (1H, s); HRMS (ESI+): Calcd for  $\text{C}_{10}\text{H}_{22}\text{NO}$   $[\text{M}+\text{NH}_4]^+$ : 172.17014, Found: 172.17095.  $[\alpha]_D^{20} -17.2$  ( $c = 1.00, \text{CHCl}_3$ ) for a sample with 97:3 er. The spectroscopic data match those reported previously.<sup>11</sup> Enantiomeric purity was determined by GLC analysis in comparison with authentic racemic material (97:3 er shown below;  $\beta$ -dex column, 15 psi, 70  $^\circ\text{C}$ ).

(11) (a) Ohloff, G.; Klein, E. *Tetrahedron* **1962**, *18*, 37-42. (b) Schneider, J. S.; Yoshihara, K.; Nakanishi, K. *J. Chem. Soc., Chem. Comm.* **1983**, *7*, 352-353. (c) Reich, H. J.; Yelm, K. E. *J. Org. Chem.* **1991**, *56*, 5672-5679.



■ **Proof of Stereochemistry:** Value reported previously ( $[\alpha]_D^{20} -19.4$ ,  $c$  8.15,  $\text{CHCl}_3$ ) is assigned for the (*R*)-(-)-Linalool.<sup>11</sup>

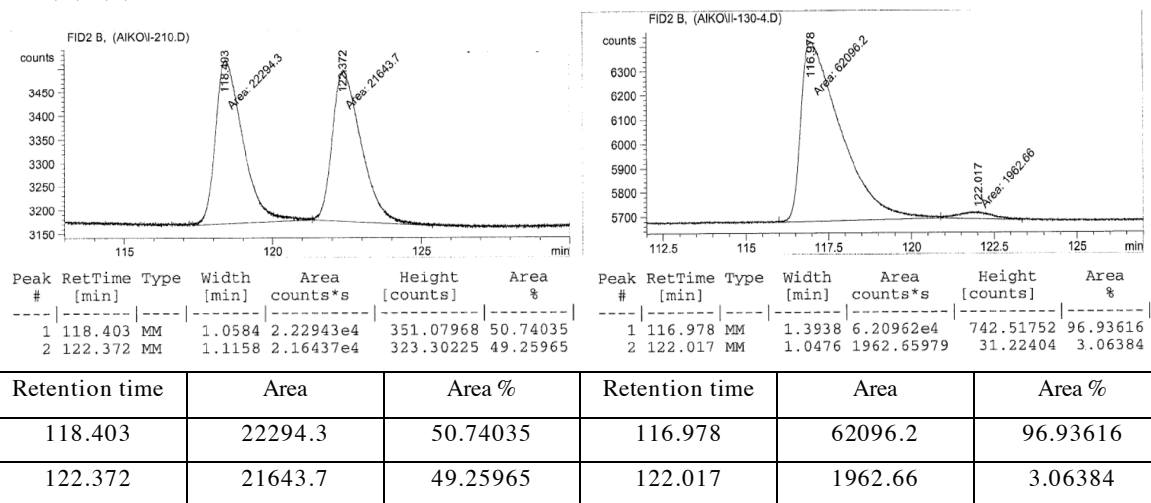

**(*R*)-3-Methyl-5-phenylpent-1-en-3-ol, (Table 2, entry 3):** IR (neat): 3409 (br, w), 3085 (w), 3062 (w), 3026 (w), 2971 (w), 2930 (w), 2864 (w), 1643 (w), 1603 (w), 1497 (w), 1454 (w), 1411 (w), 1370 (w), 1266 (w), 1216 (w), 1155 (w), 1105 (w), 1069 (w), 1030 (w), 996 (w), 917 (m), 828 (w), 756 (w), 730 (m), 697 (s), 620 (w), 558 (w), 503 (w), 425 (w)  $\text{cm}^{-1}$ ;  $^1\text{H}$  NMR (400 MHz,  $\text{CDCl}_3$ ):  $\delta$  7.30-7.25 (2H, m), 7.20-7.16 (3H, m), 5.98 (1H, dd,  $J = 17.4, 10.8$  Hz), 5.27 (1H, dd,  $J = 17.2, 1.2$  Hz), 5.12 (1H, dd,  $J = 10.8, 1.2$  Hz), 2.722.60 (2H, m), 1.92-1.78 (2H, m), 1.45 (1H, bs), 1.35 (3H, s);  $^{13}\text{C}$  NMR (100 MHz,  $\text{CDCl}_3$ ):  $\delta$  144.8, 142.3, 128.4, 128.3, 125.7, 112.0, 73.2, 44.0, 30.3, 28.0; HRMS (ESI+): Calcd for  $\text{C}_{12}\text{H}_{20}\text{NO}$   $[\text{M}+\text{NH}_4]^+$ : 194.15449, Found: 194.15449.  $[\alpha]_D^{20} -25.0$  ( $c = 1.00$ ,  $\text{CHCl}_3$ ) for an enantiomerically enriched sample of 96.5:3.5 er. Enantiomeric purity was determined by GLC analysis in comparison with authentic racemic material (96.5:3.5 er shown;  $\beta$ -dex column, 15 psi, 120  $^\circ\text{C}$ ).

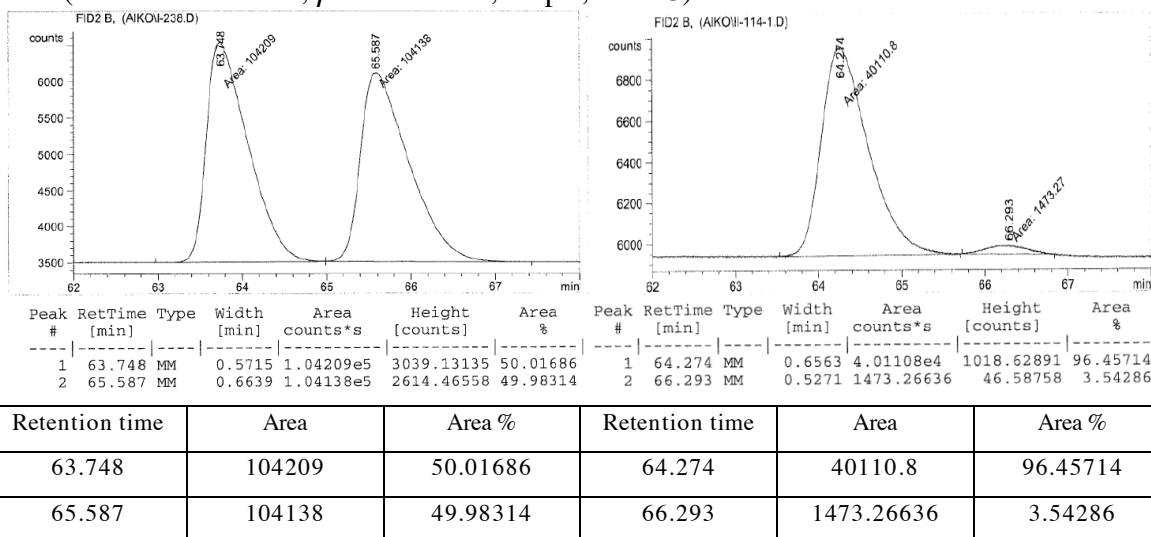

**(R)-6-((tert-Butyldimethylsilyl)oxy)-3-methylhex-1-en-3-ol**, (Table 2, entry 4): IR (neat): 3413 (br, w), 2953 (w), 2929 (w), 2857 (w), 1645 (w), 1472 (w), 1462 (w), 1409 (w), 1388 (w), 1362 (w), 1254 (m), 1095 (s), 1004 (w), 938 (w), 918 (m), 832 (s), 773 (s), 712 (w), 682 (w), 661 (w)  $\text{cm}^{-1}$ ;  $^1\text{H}$  NMR (400 MHz,  $\text{CDCl}_3$ ):  $\delta$  5.89 (1H, dd,  $J = 17.2, 10.6$  Hz), 5.23 (1H, dd,  $J = 17.2, 1.4$  Hz), 5.04 (1H, dd,  $J = 10.8, 1.6$  Hz), 3.69-3.59 (2H, m), 2.72 (1H, br s), 1.68-1.55 (4H, m), 1.27 (3H, s), 0.90 (9H, s), 0.06 (6H, s);  $^{13}\text{C}$  NMR (100 MHz,  $\text{CDCl}_3$ ):  $\delta$  145.3, 111.7, 72.6, 63.8, 39.5, 28.2, 27.3, 25.9, 18.3, -5.40; HRMS (ESI+): Calcd for  $\text{C}_{13}\text{H}_{27}\text{OSi}$  [M-OH]: 227.1831, Found: 227.1829.  $[\alpha]_D^{20} -3.2$  ( $c = 1.00, \text{CHCl}_3$ ) for an enantiomerically enriched sample of 95:5 er. Enantiomeric purity was determined by GLC analysis in comparison with authentic racemic material (95:5 er shown;  $\beta$ -dex column, 15 psi, 110  $^\circ\text{C}$ ).

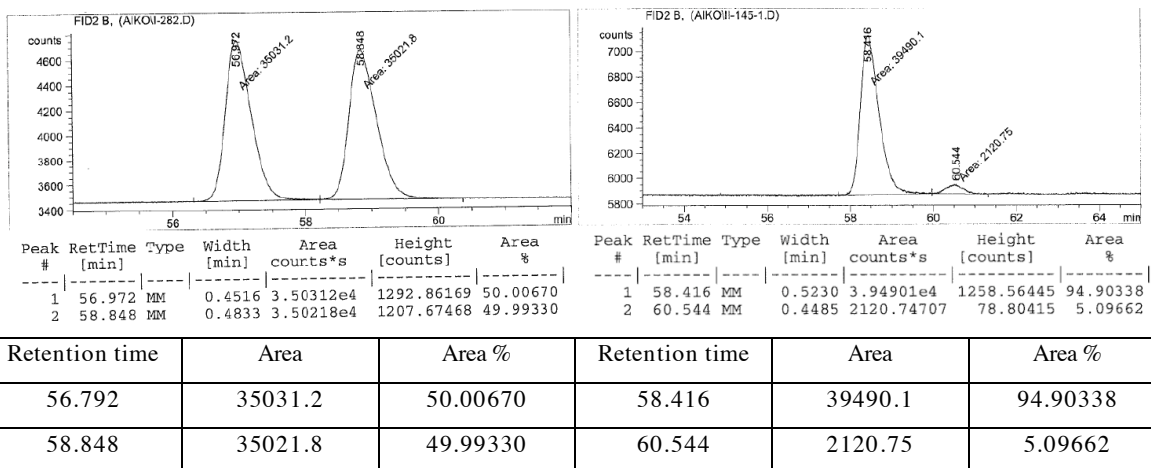

**(R)-4-Hydroxy-4-methylhex-5-en-1-yl benzoate** (Table 2, entry 5): IR (neat): 3494 (b, w), 3064 (w), 2965 (w), 1716 (m), 1703 (m), 1602 (w), 1584 (w), 1452 (w), 1315 (w), 1272 (s), 1176 (w), 1111 (m), 1070 (w), 1026 (w), 995 (w), 920 (m), 852 (w), 709 (s), 687 (m), 675 (w)  $\text{cm}^{-1}$ ;  $^1\text{H}$  NMR (400 MHz,  $\text{CDCl}_3$ ):  $\delta$  8.06-8.03 (2H, m), 7.58-7.54 (1H, m), 7.46-7.42 (2H, m), 5.93 (1H, dd,  $J = 17.4, 10.8$  Hz), 5.24 (1H, dd,  $J = 17.4, 1.2$  Hz), 5.09 (1H, dd,  $J = 10.8, 1.2$  Hz), 4.33 (2H, t,  $J = 6.6$  Hz), 1.87-1.79 (2H, m), 1.71-1.65 (2H, m), 1.44-1.43 (1H, m), 1.32 (3H, s);  $^{13}\text{C}$  NMR (100 MHz,  $\text{CDCl}_3$ ):  $\delta$  166.6, 144.7, 132.8, 130.3, 129.5, 128.3, 112.1, 72.9, 65.2, 38.4, 28.0, 23.5; HRMS (ESI+): Calcd for  $\text{C}_{14}\text{H}_{22}\text{NO}_3$  [M+ $\text{NH}_4$ ] $^+$ : 252.15997, Found: 252.16059.  $[\alpha]_D^{20} -8.6$  ( $c = 1.00, \text{CHCl}_3$ ) for an enantiomerically enriched sample of 95:5 er. Enantiomeric purity was determined by GLC analysis in comparison with authentic racemic material (95:5 er shown; CDB/DM column, 15 psi, 140  $^\circ\text{C}$ ).

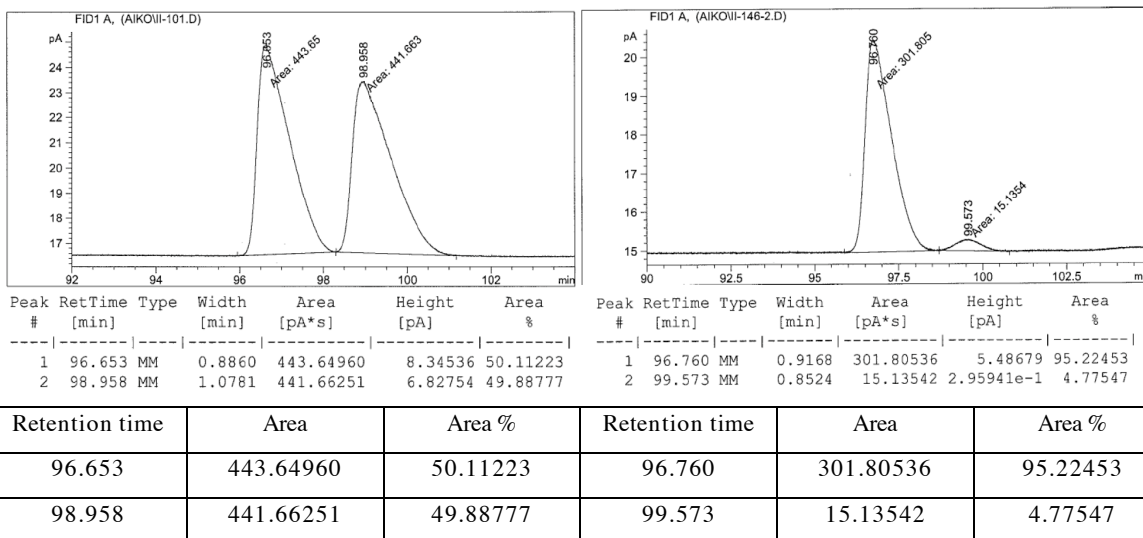

**(R)-1-Cyclohexyl-2-methylbut-3-en-2-ol (Table 2, entry 6):** IR (neat): 3423 (b, m), 3085 (w), 2919 (s), 2850 (m), 1642 (w), 1448 (m), 1411 (w), 1369 (w), 1283 (w), 1259 (w), 1228 (w), 1102 (w), 995 (w), 975 (m), 916 (s), 892 (w), 845 (w), 744 (w), 690 (w)  $\text{cm}^{-1}$ ;  $^1\text{H}$  NMR (400 MHz,  $\text{CDCl}_3$ ):  $\delta$  5.93 (1H, dd,  $J = 17.6, 10.8$  Hz), 5.20 (1H, dd,  $J = 17.2, 1.2$  Hz), 5.02 (1H, dd,  $J = 10.4, 1.2$  Hz), 1.77-1.73 (2H, m), 1.67-1.57 (3H, m), 1.45-1.36 (4H, m), 1.27-1.07 (6H, m), 1.01-0.88 (2H, m);  $^{13}\text{C}$  NMR (100 MHz,  $\text{CDCl}_3$ ):  $\delta$  145.7, 111.0, 73.8, 49.8, 35.11, 35.07, 33.7, 28.7, 26.4, 26.3, 26.2; HRMS (ESI+): Calcd for  $\text{C}_{11}\text{H}_{19}$  [M-OH]: 151.14868, Found: 151.14920.  $[\alpha]_{\text{D}}^{20} -25.0$  ( $c = 1.00, \text{CHCl}_3$ ) for an enantiomerically enriched sample of 81:19 er. Enantiomeric purity was determined by GLC analysis in comparison with authentic racemic material (81:19 er shown;  $\beta$ -dex column, 15 psi, 80  $^\circ\text{C}$ ).

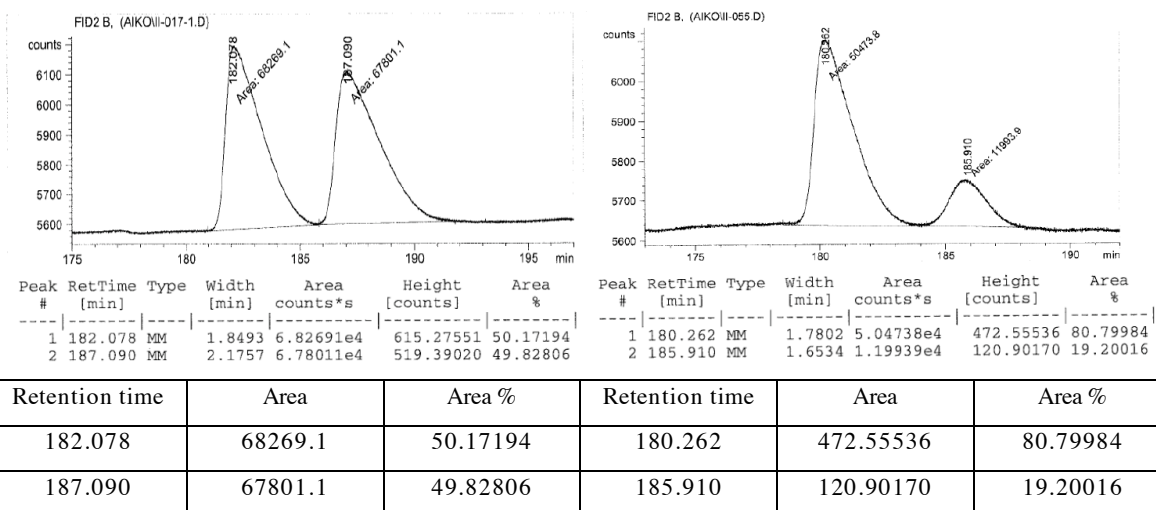

**(S)-2-Cyclohexylbut-3-en-2-ol (Table 2, entry 7):** IR (neat): 3436 (b, m), 3085 (w), 2923 (s), 2852 (m), 1642 (w), 1450 (m), 1411 (w), 1369 (w), 1291 (w), 1244 (w), 1194 (w), 1157 (w), 1130 (w), 1090 (w), 1015 (w), 996 (m), 917 (s), 892 (m), 848 (w), 809 (w), 761 (w), 744 (w), 696 (w)  $\text{cm}^{-1}$

$^1\text{H}$  NMR (400 MHz,  $\text{CDCl}_3$ ):  $\delta$  5.91 (1H, dd,  $J = 17.4, 10.8$  Hz), 5.18 (1H, dd,  $J = 17.2, 1.4$  Hz), 5.06 (1H, dd,  $J = 10.8, 1.5$  Hz), 1.82-1.75 (4H, m), 1.68-1.63 (1H, m), 1.43-0.92 (10H, m);  $^{13}\text{C}$  NMR (100 MHz,  $\text{CDCl}_3$ ):  $\delta$  144.4, 111.9, 75.3, 48.0, 27.4, 27.0, 26.6, 26.5, 26.4, 25.1; HRMS (ESI+): Calcd for  $\text{C}_{10}\text{H}_{17}[\text{M-OH}]^+$ : 137.13303, Found: 137.13258.  $[\alpha]_{\text{D}}^{20} -13.6$  ( $c = 1.00, \text{CHCl}_3$ ) for an enantiomerically enriched sample of 98:2 er. Enantiomeric purity was determined by GLC analysis in comparison with authentic racemic material (98:2 er shown; CDB/DM column, 15 psi, 100 °C).

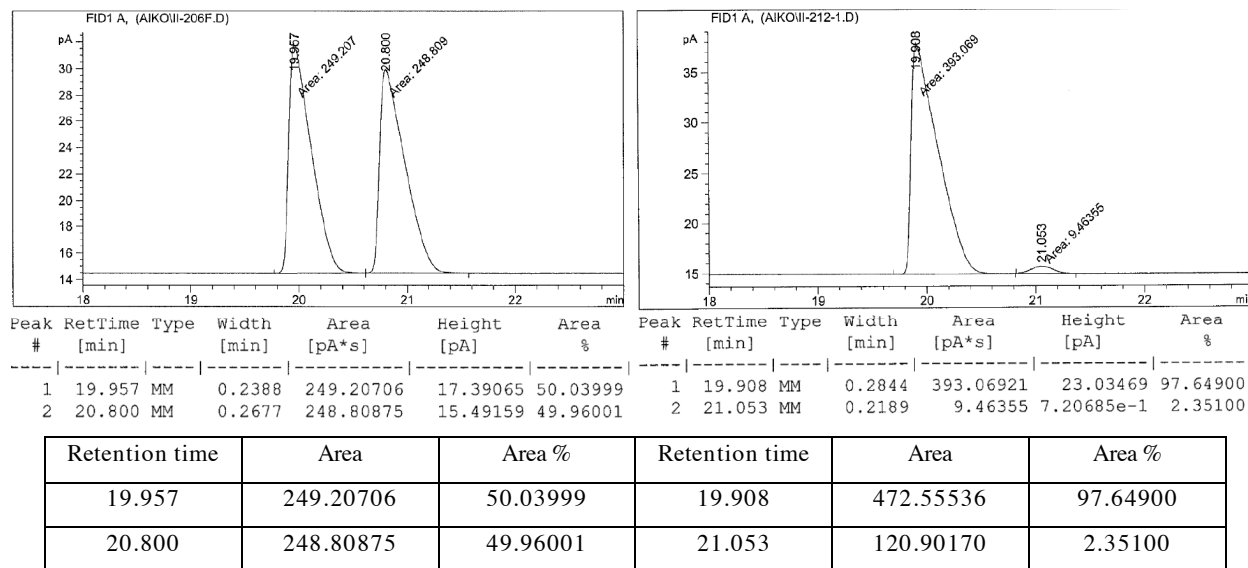

**(S)-2-Phenylbut-3-en-2-ol (Table 3, entry 1):** IR (neat): 3411 (b), 3086 (w), 3059 (w), 3026 (w), 2979 (w), 2927 (w), 1645 (w), 1601 (w), 1492 (w), 1446 (w), 1367 (w), 1218 (w), 1177 (w), 1123 (w), 1064 (w), 1027 (w), 993 (w), 921 (m), 874 (w), 765 (m), 715 (w), 699 (s), 591 (w), 539 (w)  $\text{cm}^{-1}$ ;  $^1\text{H}$  NMR (400 MHz,  $\text{CDCl}_3$ ):  $\delta$  7.49-7.46 (2H, m), 7.37-7.32 (2H, m), 7.28-7.23 (1H, m), 6.18 (1H, dd,  $J = 17.2, 10.8$  Hz), 5.30 (1H, dd,  $J = 17.2, 1.2$  Hz), 5.15 (1H, dd,  $J = 10.8, 1.2$  Hz), 1.89 (1H, br. s), 1.66 (3H, s);  $^{13}\text{C}$  NMR (100 MHz,  $\text{CDCl}_3$ ):  $\delta$  146.4, 144.8, 128.2, 127.0, 125.1, 112.3, 74.7, 29.3; HRMS (ESI+): Calcd for  $\text{C}_{10}\text{H}_{11}[\text{M-OH}]$ : 131.0861, Found: 131.0854. All spectral data matched the published values.<sup>12</sup>  $[\alpha]_{\text{D}}^{20} -23.3$  ( $c = 1.00, \text{CHCl}_3$ ) for an enantiomerically enriched sample of 90:10 er. Enantiomeric purity was determined by GLC analysis in comparison with authentic racemic material (90:10 er shown; CDB/DM column, 15 psi, 100 °C).

■ **Proof of Stereochemistry:** Literature value ( $[\alpha]_{\text{D}}^{20} -28.3$ ,  $c$  2.1, acetone) is assigned for the (S) enantiomer with 98:2 er.<sup>12</sup>

(12) (a) Ruano, J. L. G.; Rodriguez-Fernández, M. M.; Maestro, M. C. *Tetrahedron* **2004**, *60*, 5701–5710. (b) Szymiest, J. L.; Bagutskil, V.; French, R. M.; Aggarwal, V. K. *Nature* **2008**, *456*, 778–783.

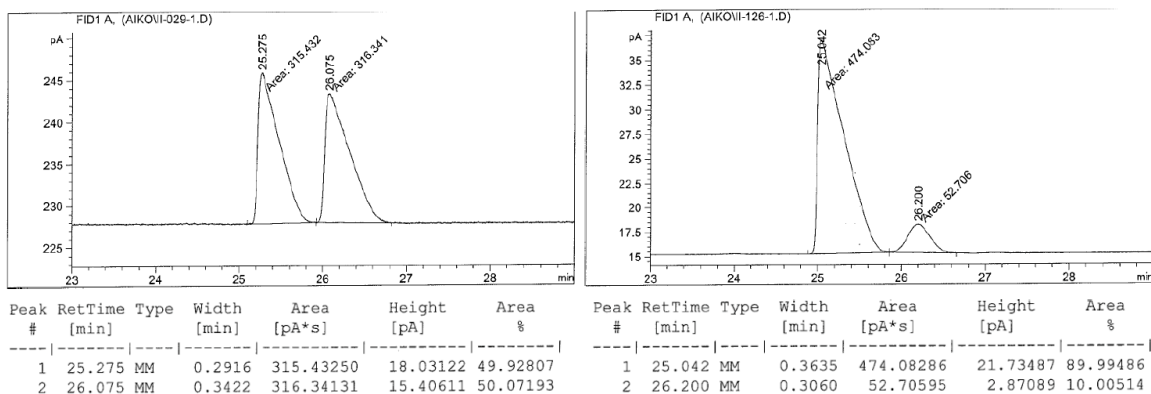

| Retention time | Area      | Area %   | Retention time | Area      | Area %   |
|----------------|-----------|----------|----------------|-----------|----------|
| 25.275         | 315.43250 | 49.92807 | 25.042         | 474.08286 | 89.99486 |
| 26.075         | 316.34131 | 50.07193 | 26.200         | 52.70595  | 10.00514 |

**(S)-2-(Naphthalen-1-yl)but-3-en-2-ol (Table 3, entry 2):** IR (neat): 3413 (b, w), 3086 (w), 3048 (w), 2975 (w), 2930 (w), 1598 (w), 1509 (w), 1453 (w), 1408 (w), 1395 (w), 1367 (w), 1265 (w), 1233 (w), 1162 (w), 1096 (m), 1068 (w), 1015 (w), 991 (m), 921 (m), 882 (w), 862 (w), 802 (m), 775 (s), 737 (w), 704 (w), 666 (w), 612 (w), 572 (w), 546 (w)  $\text{cm}^{-1}$ ;  $^1\text{H}$  NMR (400 MHz,  $\text{CDCl}_3$ ):  $\delta$  8.52-8.50 (1H, m), 7.87-7.85 (1H, m), 7.80 (1H, d,  $J = 8.2$  Hz), 7.70 (1H, dd,  $J = 7.2, 1.0$  Hz), 7.48-7.42 (3H, m), 6.40 (1H, dd,  $J = 17.4, 10.6$  Hz), 5.28 (1H, d,  $J = 17.4$  Hz), 5.22 (1H, d,  $J = 10.6$  Hz), 2.09 (1H, br. s), 1.90 (3H, s);  $^{13}\text{C}$  NMR (100 MHz,  $\text{CDCl}_3$ ):  $\delta$  145.3, 141.3, 134.7, 130.7, 128.8, 128.8, 127.4, 125.2, 125.1, 124.8, 123.6, 113.7, 75.7, 29.8; HRMS (ESI+): Calcd for  $\text{C}_{14}\text{H}_{13}$  [M-OH]: 181.1017, Found: 181.1016. All spectral data matched the published values (racemic compound).  $^{13}$   $[\alpha]_{\text{D}}^{20} -16.6$  ( $c = 1.00$ ,  $\text{CHCl}_3$ ) for an enantiomerically enriched sample of 94.4:5.6 er. Enantiomeric purity was determined by GLC analysis in comparison with authentic racemic material (94.4:5.6 er shown; CDB/DM column, 15 psi, 120 °C).

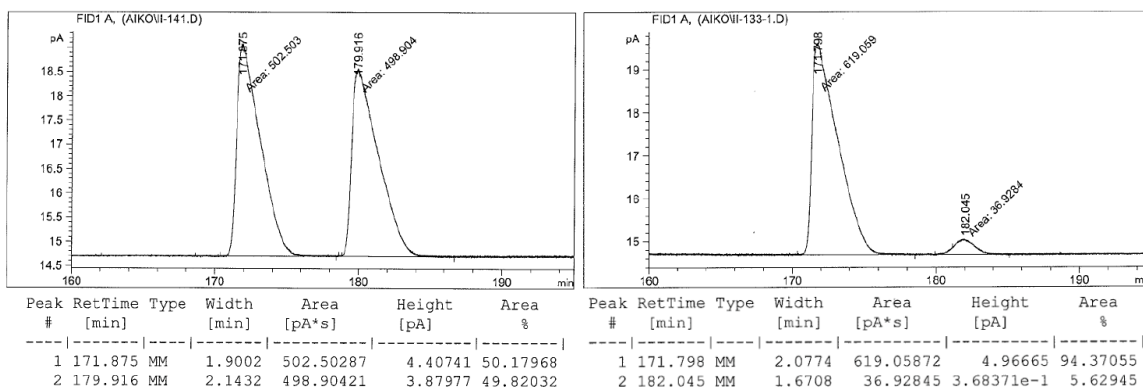

| Retention time | Area      | Area %   | Retention time | Area      | Area %   |
|----------------|-----------|----------|----------------|-----------|----------|
| 171.875        | 502.50287 | 50.17968 | 171.798        | 619.05872 | 94.37055 |

|         |           |          |         |          |         |
|---------|-----------|----------|---------|----------|---------|
| 179.916 | 498.90421 | 49.82032 | 182.045 | 36.92845 | 5.62945 |
|---------|-----------|----------|---------|----------|---------|

**(S)-2-(2-Bromophenyl)but-3-en-2-ol (Table 3, entry 3):** IR (neat): 3441 (b, w), 3062 (w), 2978 (w), 2927 (w), 2850 (w), 1588 (w), 1563 (w), 1463 (w), 1428 (w), 1408 (w), 1370 (w), 1328 (w), 1268 (w), 1233 (w), 1206 (w), 1164 (w), 1130 (w), 1074 (w), 1044 (w), 1017 (m), 988 (w), 921 (m), 872 (w), 755 (s), 729 (m), 683 (w), 650 (w), 596 (w), 553 (w), 457 (w)  $\text{cm}^{-1}$ ;  $^1\text{H}$  NMR (400 MHz,  $\text{CDCl}_3$ ):  $\delta$  7.69 (1H, dd,  $J = 8.0, 1.8$  Hz), 7.58 (1H, dd,  $J = 7.8, 1.4$  Hz), 7.32 (1H, dt,  $J = 7.6, 1.4$  Hz), 7.13 (1H, dt,  $J = 7.6, 1.8$  Hz), 6.31 (1H, dd,  $J = 17.6, 10.4$  Hz), 5.21 (1H, d,  $J = 0.8$  Hz), 5.17 (1H, dd,  $J = 5.3, 0.8$  Hz), 2.93 (1H, s), 1.80 (3H, s);  $^{13}\text{C}$  NMR (100 MHz,  $\text{CDCl}_3$ ):  $\delta$  144.2, 143.8, 134.9, 128.8, 127.9, 127.4, 121.3, 114.2, 75.5, 27.9; HRMS (ESI+): Calcd for  $\text{C}_{10}\text{H}_{15}\text{BrNO}[\text{M}+\text{NH}_4]^+$ : 244.03370, Found: 244.03358.  $[\alpha]_{\text{D}}^{20} -19.2$  ( $c = 1.00, \text{CHCl}_3$ ) for an enantiomerically enriched sample of 99:1 er. Enantiomeric purity was determined by GLC analysis in comparison with authentic racemic material (99:1 er shown; CDB/DM column, 15 psi, 100 °C).

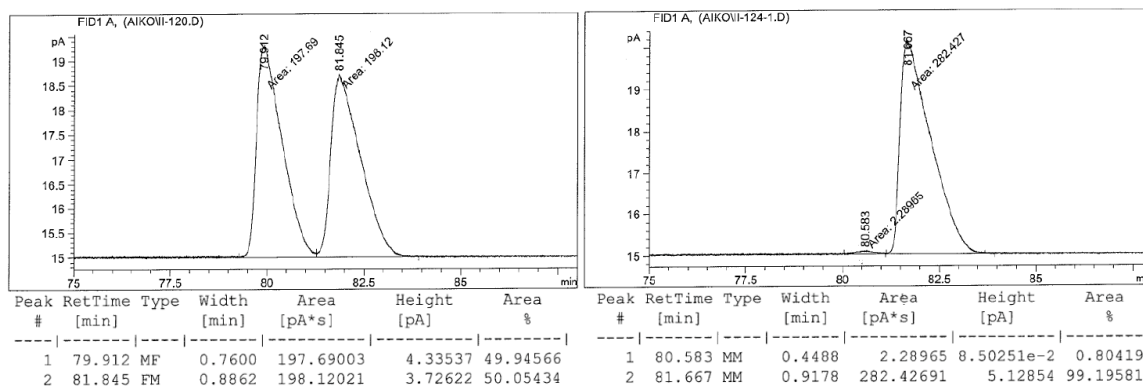

| Retention time | Area      | Area %   | Retention time | Area      | Area %   |
|----------------|-----------|----------|----------------|-----------|----------|
| 79.912         | 197.69003 | 49.94566 | 80.583         | 2.28965   | 0.80419  |
| 81.845         | 198.12021 | 50.05434 | 81.667         | 282.42691 | 99.19581 |

**(S)-2-(2-Chlorophenyl)but-3-en-2-ol (Table 3, entry 4):** IR (neat): 3566 (w), 3426 (b, w), 3063 (w), 2979 (w), 2931 (w), 1638 (w), 1592 (w), 1567 (w), 1467 (w), 1432 (w), 1409 (w), 1370 (w), 1329 (w), 1271 (w), 1162 (w), 1134 (w), 1097 (w), 1035 (m), 989 (w), 921 (m), 874 (w), 755 (s), 738 (m), 731 (m), 689 (w), 660 (w), 596 (w), 555 (w), 466 (w), 418 (w)  $\text{cm}^{-1}$ ;  $^1\text{H}$  NMR (400 MHz,  $\text{CDCl}_3$ ):  $\delta$  7.68 (1H, dd,  $J = 7.6, 1.8$  Hz), 7.36 (1H, dd,  $J = 7.6, 1.5$  Hz), 7.30-7.20 (2H, m), 6.31 (1H, dd,  $J = 17.2, 10.7$  Hz), 5.22-5.16 (2H, m), 2.81 (1H, s), 1.78 (3H, s);  $^{13}\text{C}$  NMR (100 MHz,  $\text{CDCl}_3$ ):  $\delta$  143.6, 142.8, 131.9, 131.2, 128.6, 127.5, 126.9, 113.7, 75.0, 27.7; HRMS (ESI+): Calcd for  $\text{C}_{10}\text{H}_{10}\text{Cl}[\text{M}+\text{H}-\text{H}_2\text{O}]^+$ : 165.04710, Found: 165.04647.  $[\alpha]_{\text{D}}^{20} -23.4$  ( $c = 1.00, \text{CHCl}_3$ ) for an enantiomerically enriched sample of 99:1 er. Enantiomeric purity was determined by GLC analysis in comparison with authentic racemic material (99:1 er shown; CDB/DM column, 15 psi, 80 °C).

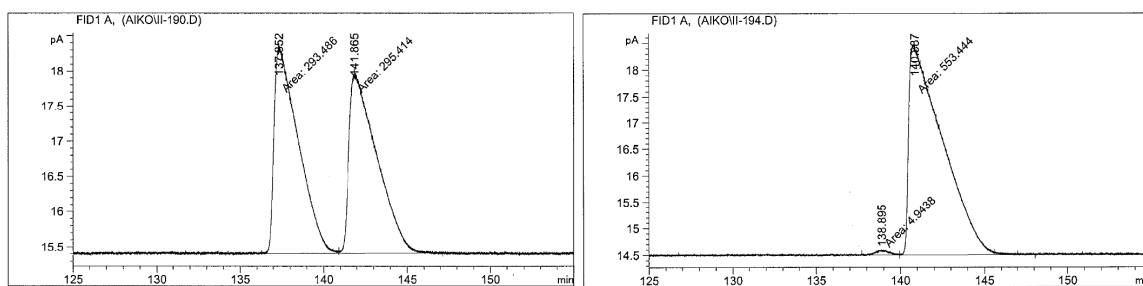

| Peak # | RetTime [min] | Type | Width [min] | Area [pA*s] | Height [pA] | Area %   |
|--------|---------------|------|-------------|-------------|-------------|----------|
| 1      | 137.352       | MF   | 1.6454      | 293.48584   | 2.97279     | 49.83628 |
| 2      | 141.865       | FM   | 1.8744      | 295.41409   | 2.62681     | 50.16372 |

| Peak # | RetTime [min] | Type | Width [min] | Area [pA*s] | Height [pA] | Area %   |
|--------|---------------|------|-------------|-------------|-------------|----------|
| 1      | 138.895       | MF   | 0.8626      | 4.94380     | 9.55228e-2  | 0.88537  |
| 2      | 140.887       | FM   | 2.3169      | 553.44440   | 3.98127     | 99.11463 |

| Retention time | Area      | Area %   | Retention time | Area      | Area %   |
|----------------|-----------|----------|----------------|-----------|----------|
| 137.352        | 293.43584 | 49.83628 | 138.895        | 4.94380   | 0.88537  |
| 141.865        | 295.41409 | 50.16372 | 140.887        | 553.44440 | 99.11463 |

**(S)-2-(*o*-Tolyl)but-3-en-2-ol (Table 4, entry 5):** IR (neat): 3397 (b, w), 3063 (w), 3015 (w), 2976 (w), 2930 (w), 1639 (w), 1602 (w), 1486 (w), 1455 (w), 1407 (w), 1367 (w), 1290 (w), 1213 (w), 1164 (w), 1129 (w), 1099 (m), 1049 (m), 993 (w), 917 (s), 876 (w), 794 (w), 760 (s), 728 (s), 702 (w), 676 (w), 614 (w), 558 (w), 462 (w)  $\text{cm}^{-1}$ ;  $^1\text{H}$  NMR (400 MHz,  $\text{CDCl}_3$ ):  $\delta$  7.54-7.50 (1H, m), 7.19-7.14 (3H, m), 6.18 (1H, dd,  $J = 17.4, 10.6$  Hz), 5.20-5.13 (2H, m), 2.46 (3H, s), 1.80 (1H, s), 1.72 (3H, s);  $^{13}\text{C}$  NMR (100 MHz,  $\text{CDCl}_3$ ):  $\delta$  144.4, 143.3, 136.4, 132.3, 127.3, 125.7, 125.5, 112.9, 75.5, 29.0, 21.9; HRMS (ESI+): Calcd for  $\text{C}_{11}\text{H}_{13}[\text{M}+\text{H}-\text{H}_2\text{O}]^+$ : 145.10173, Found: 145.10113.  $[\alpha]_{\text{D}}^{20} -19.8$  ( $c = 1.00$ ,  $\text{CHCl}_3$ ) for an enantiomerically enriched sample of 98:2 er. Enantiomeric purity was determined by GLC analysis in comparison with authentic racemic material (98:2 er shown; CDB/DM column, 15 psi, 120 °C).

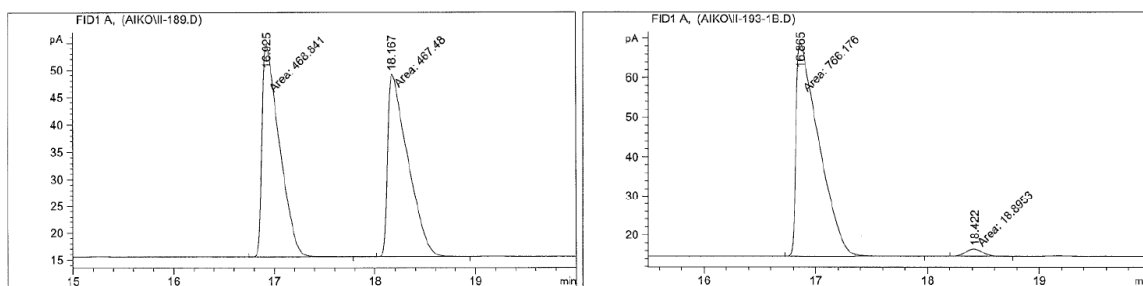

| Peak # | RetTime [min] | Type | Width [min] | Area [pA*s] | Height [pA] | Area %   |
|--------|---------------|------|-------------|-------------|-------------|----------|
| 1      | 16.925        | MM   | 0.1978      | 468.84094   | 39.50091    | 50.07267 |
| 2      | 18.167        | MM   | 0.2312      | 467.48010   | 33.69860    | 49.92733 |

| Peak # | RetTime [min] | Type | Width [min] | Area [pA*s] | Height [pA] | Area %   |
|--------|---------------|------|-------------|-------------|-------------|----------|
| 1      | 16.865        | MM   | 0.2352      | 766.17639   | 54.28933    | 97.59317 |
| 2      | 18.422        | MM   | 0.1721      | 18.89531    | 1.82994     | 2.40683  |

| Retention time | Area      | Area %   | Retention time | Area      | Area %   |
|----------------|-----------|----------|----------------|-----------|----------|
| 16.925         | 468.84094 | 50.07267 | 16.865         | 766.17639 | 97.59317 |
| 18.167         | 467.48010 | 49.92733 | 18.422         | 18.89531  | 2.40683  |

**(S)-2-(*m*-Tolyl)but-3-en-2-ol (Table 3, entry 6):** IR (neat): 3407 (br), 3087 (w), 2979 (w), 2925 (w), 2862 (w), 1640 (w), 1607 (w), 1588 (w), 1487 (w), 1451 (w), 1411 (w), 1367 (w), 1249 (w), 1170 (w), 1122 (w), 1092 (w), 1070 (w), 993 (m), 920 (s), 820 (w), 785 (s), 700 (s), 680 (w), 616

(w), 529 (w), 475 (w), 448 (w)  $\text{cm}^{-1}$ ;  $^1\text{H}$  NMR (400 MHz,  $\text{CDCl}_3$ ):  $\delta$  7.30-7.21 (3H, m), 7.09-7.06 (1H, m), 6.17 (1H, dd,  $J = 17.2, 10.6$  Hz), 5.31 (1H, dd,  $J = 17.2, 1.2$  Hz), 5.14 (1H, dd,  $J = 10.8, 1.2$  Hz), 2.36 (3H, s), 1.86 (1H, s), 1.65 (3H, s);  $^{13}\text{C}$  NMR (100 MHz,  $\text{CDCl}_3$ ):  $\delta$  146.4, 144.9, 137.8, 128.1, 127.7, 125.8, 122.2, 112.2, 74.7, 29.3, 21.6; HRMS (ESI+): Calcd for  $\text{C}_{11}\text{H}_{13}[\text{M}+\text{H}-\text{H}_2\text{O}]^+$ : 145.10173, Found: 145.10185.  $[\alpha]_{\text{D}}^{20} -13.7$  ( $c = 1.00, \text{CHCl}_3$ ) for an enantiomerically enriched sample of 93:7 er. Enantiomeric purity was determined by GLC analysis in comparison with authentic racemic material (93:7 er shown; CDB/DM column, 15 psi, 110 °C).

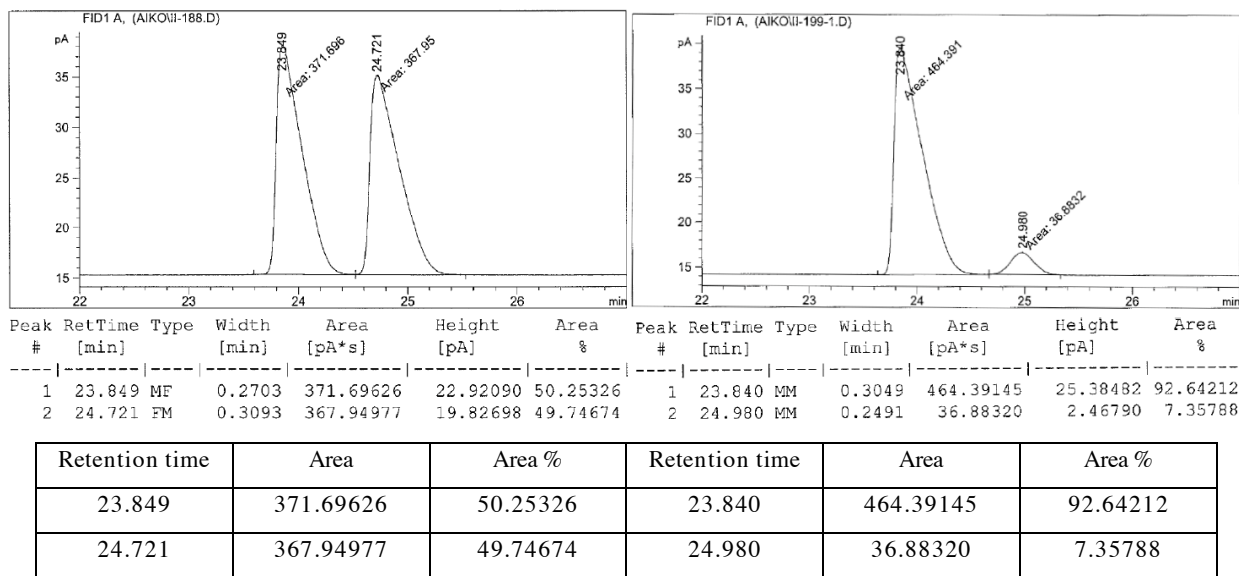

**(S)-2-(p-Tolyl)but-3-en-2-ol (Table 4, entry 7):** IR (neat): 3397 (b, w), 3087 (w), 2978 (w), 2924 (w), 2870 (w), 1641 (w), 1511 (w), 1450 (w), 1410 (w), 1367 (w), 1225 (w), 1183 (w), 1126 (w), 1105 (w), 1067 (w), 1019 (w), 993 (w), 918 (s), 875 (w), 816 (s), 725 (w), 701 (w), 655 (w), 579 (w), 536 (w)  $\text{cm}^{-1}$ ;  $^1\text{H}$  NMR (400 MHz,  $\text{CDCl}_3$ ):  $\delta$  7.38-7.35 (2H, m), 7.18-7.15 (2H, m), 6.17 (1H, dd,  $J = 17.2, 10.7$  Hz), 5.30 (1H, dd,  $J = 17.2, 1.1$  Hz), 5.14 (1H, dd,  $J = 10.8, 1.1$  Hz), 2.56 (3H, s), 1.91 (1H, s), 1.65 (3H, s);  $^{13}\text{C}$  NMR (100 MHz,  $\text{CDCl}_3$ ):  $\delta$  145.0, 143.5, 136.6, 128.9, 125.1, 112.1, 74.6, 29.3, 20.9; HRMS (ESI+): Calcd for  $\text{C}_{11}\text{H}_{13}[\text{M}+\text{H}-\text{H}_2\text{O}]^+$ : 145.10173, Found: 145.10243.  $[\alpha]_{\text{D}}^{20} -17.4$  ( $c = 1.00, \text{CHCl}_3$ ) for an enantiomerically enriched sample of 92:8 er. Enantiomeric purity was determined by GLC analysis in comparison with authentic racemic material (92:8 er shown; CDB/DM column, 15 psi, 130 °C).



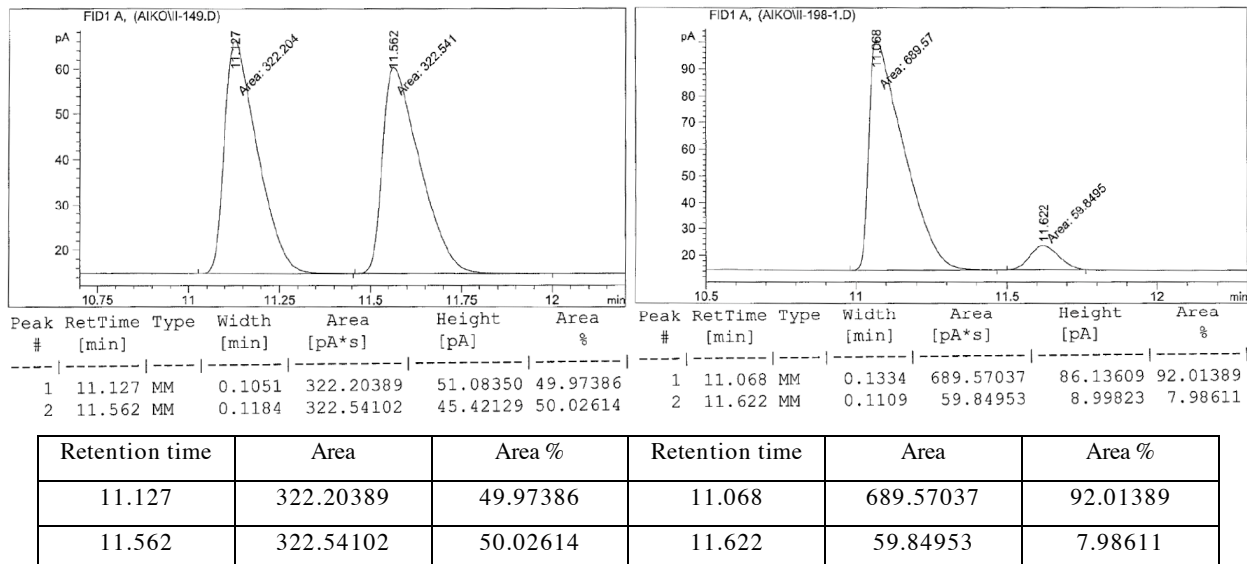

**(S)-3-Phenylpent-1-en-3-ol (13):** IR (neat): 3455 (b, w), 3086 (w), 3060 (w), 3027 (w), 2969 (w), 2934 (w), 2879 (w), 1638 (w), 1601 (w), 1492 (w), 1447 (w), 1410 (w), 1377 (w), 1348 (w), 1262 (w), 1167 (w), 1101 (w), 1059 (w), 1030 (w), 975 (w), 917 (m), 905 (m), 787 (w), 759 (s), 698 (s), 614 (w), 557 (w)  $\text{cm}^{-1}$ ;  $^1\text{H}$  NMR (400 MHz,  $\text{CDCl}_3$ ):  $\delta$  7.46-7.42 (2H, m), 7.37-7.32 (2H, m), 7.27-7.22 (1H, m), 6.19 (1H, dd,  $J = 17.2, 10.7$  Hz), 5.30 (1H, dd,  $J = 17.2, 1.2$  Hz), 5.17 (1H, dd,  $J = 10.6, 1.1$  Hz), 2.02-1.86 (2H, m), 1.79 (11H, s), 0.85 (3H, t,  $J = 7.4$  Hz);  $^{13}\text{C}$  NMR (100 MHz,  $\text{CDCl}_3$ ):  $\delta$  145.4, 144.1, 128.1, 126.8, 125.4, 112.7, 77.1, 34.6, 7.86; HRMS (ESI+): Calcd for  $\text{C}_{11}\text{H}_{13}$  [M-OH]: 145.10173, Found: 145.10191.  $[\alpha]_D^{20} -16.4$  ( $c = 1.00$ ,  $\text{CHCl}_3$ ) for an enantiomerically enriched sample of 80:20 er. Enantiomeric purity was determined by HPLC analysis in comparison with authentic racemic material (80:20 er shown; Chiralcel HPLC column OD(H)).

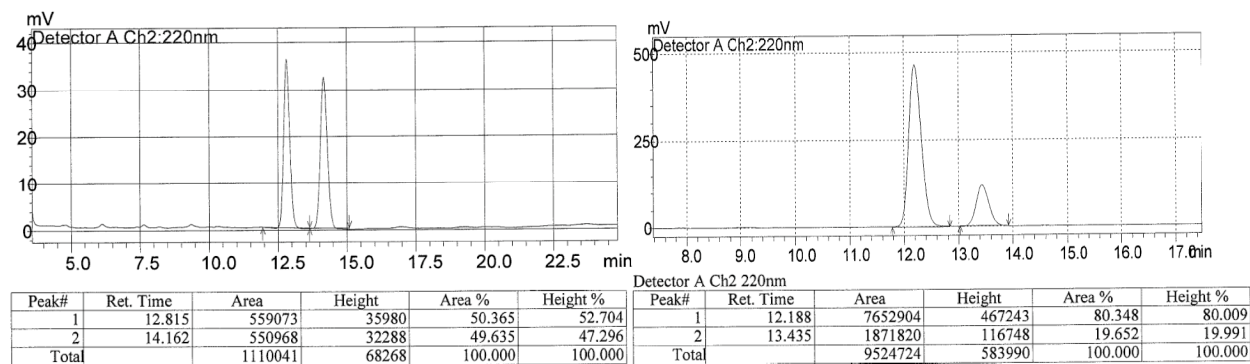

| Retention time | Area   | Area % | Retention time | Area    | Area % |
|----------------|--------|--------|----------------|---------|--------|
| 12.815         | 559073 | 50.365 | 12.188         | 7652904 | 80.348 |
| 14.162         | 550968 | 49.635 | 13.435         | 187120  | 19.652 |

**Representative experimental procedure for enantioselective Cu-catalyzed substitution reaction of (*E*)-3-Cyclohexylbut-2-en-1-yl methyl carbonate with bis(pinacolato) diboron: (*R*)-2-(2-Cyclohexylbut-3-en-2-yl)-4,4,5,5-tetramethyl-1,3,2-dioxaborolane (**14**):** In an N<sub>2</sub>-filled glovebox, an oven-dried vial (4 mL, 17 x 38 mm) with magnetic stir bar was charged with imidazolium salt **4a** (6.0 mg, 0.012 mmol, 6.0 mol %), Cu(OTf)<sub>2</sub> (3.7 mg, 0.010 mmol, 5.0 mol %), NaOMe (8.8 mg, 0.16 mmol, 80 mol %) and DME (1.0 mL) under N<sub>2</sub> atmosphere. The mixture was sealed with a cap (phenolic open top cap with red PTFE/white silicone) and allowed to stir for 30 min. The color of the solution was clear blue. Bis(pinacolato)diboron (102 mg, 0.400 mmol, 2.0 equiv) was added to the solution. The color of the solution immediately turned dark brown. The vial was resealed with a cap (phenolic open top cap with red PTFE/white silicone). After 30 min the vial removed from the glove box and was allowed to cool to -30 °C (cryocool), and stir for 10 min, and (*E*)-3-cyclohexylbut-2-en-1-yl methyl carbonate (42.5 mg, 0.200 mmol, 1.0 equiv) was added neat by syringe. The reaction was allowed to stir 24 h at -30 °C. The solution was quenched by the addition of THF (reagent grade), was allowed to warm to 22 °C, and passed through a short plug of celite and silica gel, eluting with Et<sub>2</sub>O (3 x 2 mL). The filtrate was concentrated in vacuo to provide dark brown oil, which was purified by silica gel chromatography (0% → 1% Et<sub>2</sub>O in hexanes) to afford the allylic boronate, (*R*)-2-(2-cyclohexylbut-3-en-2-yl)-4,4,5,5-tetramethyl-1,3,2-dioxaborolane (**15**), as a colorless oil (30.8 mg, 0.200 mmol, >98% yield). IR (neat): 3081 (w), 2977 (w), 2923 (m), 2852 (w), 1626 (w), 1449 (w), 1410 (w), 1371 (w), 1341 (m), 1308 (s), 1271 (w), 1245 (w), 1232 (w), 1193 (w), 1165 (w), 1143 (s), 1110 (m), 1087 (m), 1037 (w), 1004 (w), 966 (w), 898 (m), 886 (w), 852 (m), 808 (w), 772 (w), 722 (w), 671 (w), 662 (w), 579 (w), 520 (w), 445 (w) cm<sup>-1</sup>; <sup>1</sup>H NMR (400 MHz, CDCl<sub>3</sub>): δ 5.90 (1H, dd, *J* = 17.4, 10.8 Hz), 4.98 (1H, dd, *J* = 10.8, 1.6 Hz), 4.89 (1H, dd, *J* = 17.6, 1.6 Hz), 1.73-1.51 (5H, m), 1.30-0.94 (21H, m); <sup>13</sup>C NMR (100 MHz, CDCl<sub>3</sub>): δ 144.9, 111.5, 83.0, 44.2, 30.3, 29.8, 27.6, 27.1, 27.0, 26.8, 24.7, 24.5, 14.3; HRMS (ESI+): Calcd for C<sub>16</sub>H<sub>30</sub>BO<sub>2</sub>[M+H]: 265.23388, Found: 265.23501. [α]<sub>D</sub><sup>20</sup> -12.6 (*c* = 1.00, CHCl<sub>3</sub>) for an enantiomerically enriched sample of 98:2 er (enantiomeric purity was confirmed after oxidation to the alcohol (*S*)-2-cyclohexylbut-3-en-2-ol, page S-21).

**(*R*)-2-(2-(2-Bromophenyl)but-3-en-2-yl)-4,4,5,5-tetramethyl-1,3,2-dioxaborolane (**15**):** IR (neat): 2976 (m), 2929 (w), 1466 (m), 1370 (m), 1315 (s), 1264 (m), 1141 (s), 1125 (s), 1082 (m), 1020 (m), 965 (m), 907 (m), 876 (m), 847 (m), 752 (m), 727 (m), 660 (m), 643 (m) cm<sup>-1</sup>; <sup>1</sup>H NMR (CDCl<sub>3</sub>, 400 MHz): δ 7.53 (1H, dd, *J* = 8.0, 1.2 Hz), 7.30–7.24 (2H, m), 7.05 (1H, ddd, *J* = 8.0, 6.4, 2.4 Hz), 6.26 (1H, dd, *J* = 17.6, 10.8 Hz), 5.21 (1H, dd, *J* = 10.4, 1.2 Hz), 5.03 (1H, dd, *J* = 17.2, 0.8 Hz), 1.40 (3H, s), 1.19 (6H, s), 1.18 (6H, s); <sup>13</sup>C NMR (CDCl<sub>3</sub>, 100 MHz): δ 145.9, 142.7, 133.2, 129.3, 127.6, 127.4, 125.0, 113.8, 83.6, 30.3, 24.8, 24.7, 20.6; HRMS (ESI+): Calcd for C<sub>16</sub>H<sub>23</sub>BBro<sub>2</sub> [M+H]: 337.09745, Found: 337.09691. [α]<sub>D</sub><sup>20</sup> -41.3 (*c* = 1.00, CHCl<sub>3</sub>) for an enantiomerically enriched sample of 99:1 er (enantiomeric purity was confirmed after oxidation to the alcohol (*S*)-2-(2-bromophenyl)but-3-en-2-ol, page S-23).
